# Supplementary material for: Deciphering Mineral Homeostasis in Barley Seed Transfer Cells at Transcriptional Level
Source: PLoS One. 2015 Nov 4;10(11):e0141398. doi: 10.1371/journal.pone.0141398 (PMC4633283; doi:10.1371/journal.pone.0141398)
Supplement: S2 File — (XLSX) [file pone.0141398.s008.xlsx]

## Sheet: S2 File
S2 File: Differentially expressed events found in different comparisons.
	Fe and Zn represent iron and zinc treatments. UT is for the untreated sample. Labels 6 and 24 represent samples collected 6 h and 24 h after either of the treatments. For example, 24Fe/UT represents the comparison of 24Fe with UT.
	Accession numbers are based on Ensemblplants database available at http://plants.ensembl.org/index.html.
Chromosome	Accession numbers in Ensemblplants at http://plants.ensembl.org/index.html	Gene name/Putative function	Homologue source	Gene ID	Transcript ID	Log2 fold change	Corrected P values (FDR)	Comparisons
chr1	MLOC_46003	B1-hordein; sulfur-rich seed storage protein		XLOC_000025	TCONS_00000085	3.93205	1.74e-06	24Fe/UT
chr1	XLOC_000176	Uncharacterized		XLOC_000176	TCONS_00000590	-8.96209	0.00800713	24Fe/UT
chr1	MLOC_60926	Mitogen-activated protein kinase 2;likely involved in defense signaling (see Plant J 2003, 34:149-60). MAP kinases function downstream of HSP90 and upstream of mitochondria in TMV resistance (see Plant Cell Physiol 2007, 48:498-510).	Triticum aestivum	XLOC_000260	TCONS_00000869	9.68652	0.00439991	24Fe/UT
chr1	MLOC_63208	CHY-type zinc finger protein; likely induced by stripe rust pathogen	Triticum aestivum	XLOC_000321	TCONS_00001092	-8.82992	0.00918833	24Fe/UT
chr1	MLOC_64658	Uncharacterized protein, Coiled-coil domain-containing protein 25-like	Brachypodium distachyon	XLOC_000452	TCONS_00001571	9.04647	0.00725957	24Fe/UT
chr1	MLOC_69831	E3 ubiquitin-protein ligase UPL4; probable E3 ubiquitin-protein ligase which mediates ubiquitination and subsequent proteasomal degradation of target proteins.	Aegilops tauschii	XLOC_000985	TCONS_00003496	-9.2162	0.0063877	24Fe/UT
chr1	MLOC_7079	Alpha tubulin-2A; tubulin is the major constituent of microtubules. It binds two moles of GTP, one at an exchangeable site on the beta chain and one at a non-exchangeable site on the alpha chain.	Triticum aestivum	XLOC_001178	TCONS_00004123	-1.18775	0.00368846	24Fe/UT
chr1	XLOC_001439	B1 hordein		XLOC_001439	TCONS_00004968	4.84398	0.000335555	24Fe/UT
chr1	MLOC_68591	Nuclear receptor coactivator 3-like (NCOA3); nuclear receptor coactivator that directly binds nuclear receptors and stimulates the transcriptional activities in a hormone-dependent fashion. Present in a complex containing NCOA2, IKKA, IKKB, IKBKG and the histone acetyltransferase protein CREBBP. For plants see Nucleic Acids Research 2002, 30:5036-5055. NCOA3 is frequently amplified or overexpress…	Setaria italica	XLOC_001469	TCONS_00005037	8.79401	0.00959128	24Fe/UT
chr1	MLOC_38832	Similar to CIPK1 interacting protein ECT2; Environmental stimuli, including light, pathogens, hormones, and abiotic stresses, elicit changes in the cytosolic Ca(2+) signatures of plant cells. However, little is known about the molecular mechanisms by which plants sense and transmit the specific cytoplasmic Ca(2+) signal into the nucleus, where gene regulation occurs to respond appropriately to th…	Arabidopsis thaliana	XLOC_001558	TCONS_00005327	-8.99949	0.00767755	24Fe/UT
chr1	MLOC_370	Cytochrome c oxidase subunit 1; catalyzes the reduction of oxygen to water. Electrons originating in cytochrome c are transferred via the copper A center of subunit 2 and heme A of subunit 1 to the bimetallic center formed by heme A3 and copper B.	Zea mays	XLOC_001563	TCONS_00005336	-1.11366	0.000256212	24Fe/UT
chr1	XLOC_001583	F-box/LRR-repeat protein 14, FBL14; ubiquitin-dependent protein catabolic process (DEGRADATION).	Triticum urartu	XLOC_001583	TCONS_00005411	-8.99949	0.00767755	24Fe/UT
chr1	XLOC_001806	Mediator of RNA polymerase II transcription subunit 16, ATSFR6, IEN1, INSENSITIVE TO EXOGENOUS NAD+ 1, MED16, MEDIATOR 16, SENSITIVE TO FREEZING 6, SFR6; involved in freezing tolerance (Plant J 2009, 58:97-108) and others like actin nucleation, cell adhesion, cell wall organization, circadian regulation of gene expression, cold acclimation, hydrogen peroxide biosynthetic process, positive regulat…	Arabidopsis thaliana	XLOC_001806	TCONS_00006215	-9.83525	0.00376777	24Fe/UT
chr1	MLOC_77892	Uncharacterized		XLOC_001852	TCONS_00006413	-8.74438	0.00895079	24Fe/UT
chr1	MLOC_75385	GDSL esterase/lipase At1g54790-like, ENOD8 (EARLY NODULIN8) like; involved in lipid metabolism.	Brachypodium distachyon	XLOC_002174	TCONS_00007594	-7.23021	0.00665278	24Fe/UT
chr1	XLOC_002298	Uncharacterized		XLOC_002298	TCONS_00008104	-9.97949	0.00327717	24Fe/UT
chr1	XLOC_002298	Uncharacterized		XLOC_002298	TCONS_00008105	-10.9279	0.00188645	24Fe/UT
chr1	ARF1	GTP-binding, small GTPase mediated signal transduction, positive regulation of floral organ abscission by small GTPase mediated signal transduction		XLOC_002308	TCONS_00008170	11.1768	0.00188645	24Fe/UT
chr1	XLOC_002350	Uncharacterized		XLOC_002350	TCONS_00008339	10.948	0.00188645	24Fe/UT
chr1	MLOC_68728	Putative glycosyltransferase AGO61 (GTDC2); secreted. Glycosyltransferases (abbre. GTFs, Gtfs) are enzymes (EC 2.4) that are responsible for the biosynthesis of disaccharides, oligosaccharides and polysaccharides. They catalyse the transfer of monosaccharide moieties from activated nucleotide sugar (also known as the "glycosyl donor") to a glycosyl acceptor molecule, usually an alcohol.	Triticum urartu	XLOC_002539	TCONS_00009006	-3.84472	0.00528005	24Fe/UT
chr1	MLOC_68728	Putative glycosyltransferase AGO61 (GTDC2); secreted. Glycosyltransferases (abbre. GTFs, Gtfs) are enzymes (EC 2.4) that are responsible for the biosynthesis of disaccharides, oligosaccharides and polysaccharides. They catalyse the transfer of monosaccharide moieties from activated nucleotide sugar (also known as the "glycosyl donor") to a glycosyl acceptor molecule, usually an alcohol.	Triticum urartu	XLOC_002539	TCONS_00009007	10.5215	0.00222212	24Fe/UT
chr1	MLOC_62780	Spastin; ATP-dependent microtubule severing protein. Microtubule severing may promote reorganization of cellular microtubule arrays and the release of microtubules from the centrosome following nucleation. Required for membrane traffic from the endoplasmic reticulum (ER) to the Golgi and for completion of the abscission stage of cytokinesis.	Aegilops tauschii	XLOC_002733	TCONS_00009625	-10.9344	0.00188645	24Fe/UT
chr1	MLOC_62780	Spastin; ATP-dependent microtubule severing protein. Microtubule severing may promote reorganization of cellular microtubule arrays and the release of microtubules from the centrosome following nucleation. Required for membrane traffic from the endoplasmic reticulum (ER) to the Golgi and for completion of the abscission stage of cytokinesis.	Aegilops tauschii	XLOC_002733	TCONS_00009626	-10.0876	0.00288151	24Fe/UT
1H	XLOC_007180	Uncharacterized		XLOC_007180	TCONS_00014483	8.65563	0.00940921	24Fe/UT
1H	MLOC_11953	GSK-like kinase 1A, protein serine/threonine kinase activity; it has a negative role in the BR signaling pathways (see BMC Plant Biology 2013, 13:64 ). BRs (Brassinosteroids) are steroid hormones belonging to the group of endogenous signals required for plant growth and organogenesis, controlling processes such as Cell Expansion, Vascular Differentiation, Etiolation and Reproductive Development.	Triticum aestivum	XLOC_008167	TCONS_00016577	8.74521	0.00988683	24Fe/UT
1H	MLOC_14978	LEC14B homolog; involved in glycosylation. Likely, has N-Acetylglucosaminyltransferase activity (J Biol Chem 1998, 273:14090-14098).	Brachypodium distachyon	XLOC_008584	TCONS_00017873	9.44818	0.005348	24Fe/UT
1H	XLOC_009088	Uncharacterized		XLOC_009088	TCONS_00018688	-3.45721	0.000228374	24Fe/UT
1H	XLOC_015155	B3-hordein		XLOC_015155	TCONS_00024756	3.63227	0.00911103	24Fe/UT
chr2	XLOC_016167	Mitochondrial large subunit ribosomal RNA	Sorghum bicolor , Spathiphyllum wallisii	XLOC_016167	TCONS_00025956	-1.49713	7.98e-06	24Fe/UT
chr2	ACC-1	Plastid acetyl-CoA carboxylase; this isoform does not have the 593 first N-terminal amino acids including chloroplast signal peptide. Acetyl-CoA carboxylase (ACCase) directs the flow of carbon from photosynthesis to primary and secondary metabolites in plants. One ACCase isozyme supplies malonyl-CoA for de novo fatty acid biosynthesis in plastids. A second ACCase isozyme supplies malonyl-CoA for …	Triticum aestivum	XLOC_016232	TCONS_00026143	6.97786	0.0064503	24Fe/UT
chr2	XLOC_016468	Trafficking protein particle complex subunit 3-like; may play a role in vesicular transport from endoplasmic reticulum to golgi.	Brachypodium distachyon	XLOC_016468	TCONS_00026918	8.69471	0.00895079	24Fe/UT
chr2	XLOC_016530	Partially similar to microRNA1126; similarity is from nucleotide 1 to 633 of the barley miRNA1126. SEE BMC Genomics 2013, 14:34		XLOC_016530	TCONS_00027115	-6.88714	0.00918833	24Fe/UT
chr2	MLOC_67100	Uncharacterized WD repeat-containing protein C2A9.03-like	Brachypodium distachyon	XLOC_016535	TCONS_00027153	-7.15607	0.00592486	24Fe/UT
chr2	MLOC_67100	Uncharacterized WD repeat-containing protein C2A9.03-like	Brachypodium distachyon	XLOC_016535	TCONS_00027165	8.76982	0.0096841	24Fe/UT
chr2	MLOC_12301	Putative homeodomain-like transcription factor superfamily protein; SANT domain containing proteins bind telomeric DNA tandem repeats as part of the capping complex.	Zea mays	XLOC_016748	TCONS_00027923	8.61547	0.00955084	24Fe/UT
chr2	MLOC_61752	Hydrolase, hydrolyzing O-glycosyl compound precursor	Zea mays	XLOC_016925	TCONS_00028640	-10.4582	0.00222212	24Fe/UT
chr2	MLOC_33688	F-box/LRR-repeat protein 13-like; likely acts for substrate-recognition component of the SCF (SKP1-CUL1-F-box protein)-type E3 ubiquitin ligase complex.	Setaria italica	XLOC_017148	TCONS_00029480	-9.94156	0.00338112	24Fe/UT
chr2	MLOC_62518	Putative glucose-6-phosphate 1-epimerase; catalyzes the interconversion between the alpha and beta anomers from at least three hexose 6-phosphate sugars (Glc6P, Gal6P, and Man6P). Involved in cellular carbohydrate metabolic process.	Triticum urartu	XLOC_017420	TCONS_00030381	10.8986	0.00188645	24Fe/UT
chr2	MLOC_64217	F-box/kelch-repeat protein At5g60570-like isoform 1, Galactose oxidase/kelch repeat superfamily protein. Galactose oxidase (GAO) is a Cu-containing oxidase found only in the genus Fusarium which contains many plant pathogens. It catalyses the oxidation of a terminal galactose residue to the corresponding aldehyde with the production of hydrogen peroxide.	Brachypodium distachyon	XLOC_017450	TCONS_00030505	-9.80035	0.0039013	24Fe/UT
chr2	HA2, MLOC_75846	Plasma membrane P-type proton pump ATPase, cation-transporting ATPase activity		XLOC_017610	TCONS_00031029	-11.7831	0.00139492	24Fe/UT
chr2	MLOC_14650	Sacsin-like; a specialized type of Zn-finger of 40 to 60 residues that binds two atoms of zinc, Sacsin is a Hsp70 co-chaperone in human (see Hum Mol Genet 2009, 18:1556-65).	Brachypodium distachyon	XLOC_017782	TCONS_00031701	-9.53764	0.00502045	24Fe/UT
chr2	XLOC_017991	Mitochondrial large subunit ribosomal RNA	Orontium aquaticum	XLOC_017991	TCONS_00032303	-1.50091	7.98e-06	24Fe/UT
chr2	MLOC_67779	Cullin-associated NEDD8-dissociated protein 1 (CAND1); key assembly factor of SCF (SKP1-CUL1-F-box protein) E3 ubiquitin ligase complexes that promotes the exchange of the substrate-recognition F-box subunit in SCF complexes, thereby playing a key role in the cellular repertoire of SCF complexes. Acts as a F-box protein exchange factor. Required for SCF(TIR1) function. Modulates SCF(TIR1) functio…	Triticum urartu	XLOC_018013	TCONS_00032381	-7.7497	0.00589247	24Fe/UT
chr2	MLOC_62732	Transformation/transcription domain-associated protein-like isoform X2; an adapter protein, which is found in various multiprotein chromatin complexes with histone acetyltransferase activity (HAT), which gives a specific tag for epigenetic transcription activation.	Setaria italica	XLOC_018274	TCONS_00033219	-9.11759	0.00697473	24Fe/UT
chr2	MLOC_67112	DNA-directed RNA polymerases I, II, and III subunit RPABC2	Brachypodium distachyon	XLOC_018410	TCONS_00033677	8.99522	0.00767755	24Fe/UT
chr2	MLOC_66645	Polyadenylate-binding protein 2, PABP-2; Localization of poly(A)-binding protein 2 (PABP2) in nuclear speckles is independent of import into the nucleus and requires binding to poly(A) RNA (Journal of Cell Science 2000, 113:2309-2318). Polyadenylation-Dependent Control of Long Noncoding RNA Expression by the Poly(A)-Binding Protein Nuclear 1 (PLoS Genet 2012, 8: e1003078).	Triticum urartu	XLOC_018651	TCONS_00034418	9.16251	0.00665278	24Fe/UT
chr2	MLOC_66645	Polyadenylate-binding protein 2, PABP-2; Localization of poly(A)-binding protein 2 (PABP2) in nuclear speckles is independent of import into the nucleus and requires binding to poly(A) RNA (Journal of Cell Science 2000, 113:2309-2318). Polyadenylation-Dependent Control of Long Noncoding RNA Expression by the Poly(A)-Binding Protein Nuclear 1 (PLoS Genet 2012, 8: e1003078). This isoform just can c…	Triticum urartu	XLOC_018651	TCONS_00034423	-7.29081	0.00918833	24Fe/UT
chr2	MLOC_56095	PP2C, Putative protein phosphatase 2C 39; binds 2 magnesium or manganese ions per subunit and catalyzes "a phosphoprotein + H2O = a protein + phosphate". The protein phosphatase 2Cs (PP2Cs) from various organisms have been implicated to act as negative modulators of protein kinase pathways involved in diverse environmental stress responses and developmental processes. While protein phosphatases 2…	Triticum urartu	XLOC_018760	TCONS_00034814	8.80596	0.00945181	24Fe/UT
chr2	MLOC_13052	U6 snRNA-associated Sm-like protein LSm1-like (LSM1); plays a role in replication-dependent histone mRNA degradation. Binds specifically to the 3'-terminal U-tract of U6 snRNA (Genes Dev 2008, 22:50-65).	Brachypodium distachyon	XLOC_018898	TCONS_00035418	8.87563	0.00882251	24Fe/UT
chr2	MLOC_5020	Putative leucine-rich repeat-containing protein DDB_G0290503-like; a chromosome segregation ATPases involed in cell division and chromosome partitioning.	Setaria italica	XLOC_019189	TCONS_00036550	11.0545	0.00188645	24Fe/UT
chr2	MLOC_56261	ABC transporter C family member 2; vacoular membrane pump for glutathione S-conjugates. Mediates the transport of S-conjugates such as GSH, S-(2,4-dinitrophenyl)-glutathione (DNP-GS), GSSG, cyanidin 3-glucoside-GS (C3G-GS) and metolachlor-GS (MOC-GS), glucuronides such as 17-beta-estradiol 17-(beta-D-glucuronide) (E217betaG), and of the chlorophyll catabolite such as B.napus nonfluorescent chloro…	Aegilops tauschii	XLOC_019278	TCONS_00036893	-6.23125	0.00650797	24Fe/UT
2HL	MLOC_16279	26S proteasome non-ATPase regulatory subunit 1; acts as a regulatory subunit of the 26 proteasome which is involved in the ATP-dependent degradation of ubiquitinated proteins.	Aegilops tauschii	XLOC_025724	TCONS_00044536	9.56525	0.00497042	24Fe/UT
2HL	MLOC_38553	Uncharacterized		XLOC_026032	TCONS_00045341	-8.93661	0.00817671	24Fe/UT
2HL	MLOC_38553	Uncharacterized		XLOC_026032	TCONS_00045344	9.07637	0.00720421	24Fe/UT
2HL	MLOC_36767	D-lactate dehydrogenase [cytochrome], mitochondrial-like; catalyzes the stereospecific oxidation of D-lactate to pyruvate. Predicted for ER localization by PlantLoc server.	Brachypodium distachyon	XLOC_026289	TCONS_00045885	-9.10621	0.00701507	24Fe/UT
2HL	XLOC_026648	Similar to vacuolar processing enzyme 2b (vpe2b gene); involved in proteolysis.		XLOC_026648	TCONS_00046852	6.25413	0.00771828	24Fe/UT
2HL	XLOC_026648	Similar to vacuolar processing enzyme 2b (vpe2b gene); involved in proteolysis.		XLOC_026648	TCONS_00046853	-8.32646	0.00231958	24Fe/UT
2HS	MLOC_34485	Calmodulin-related protein isoform 4; the calmodulin (CaM) family is a major class of calcium sensor proteins which collectively play a crucial role in cellular signaling cascades through the regulation of numerous target proteins (Plant Signal Behav 2006, 1:96-104).	Vitis vinifera	XLOC_030562	TCONS_00051262	-8.94941	0.00803954	24Fe/UT
2HS	MLOC_36341	Pyrrolidone-carboxylate peptidase; removes 5-oxoproline from various penultimate amino acid residues except L-proline.	Aegilops tauschii	XLOC_030624	TCONS_00051444	10.4811	0.00222212	24Fe/UT
2HS	MLOC_36341	Pyrrolidone-carboxylate peptidase; removes 5-oxoproline from various penultimate amino acid residues except L-proline.	Aegilops tauschii	XLOC_030624	TCONS_00051446	-10.3466	0.00222212	24Fe/UT
2HS	XLOC_030852	Uncharacterized		XLOC_030852	TCONS_00051869	10.198	0.00247335	24Fe/UT
2HS	XLOC_031737	Mitochondrial small subunit ribosomal RNA	Croomia pauciflora	XLOC_031737	TCONS_00053395	-1.1813	0.00927739	24Fe/UT
chr3	MLOC_62487	PDR6, Pleiotropic drug resistance protein 6-like; likely involved in defence response (Appl Environ Microbiol 2011, 77: 5973-5980; FEBS Lett 2006, 580:1123-30; Chinese Science Bulletin 2009, 54:3249-3257). A member of the PLEIOTROPIC DRUG RESISTANCE family of ATP binding cassette transporters is required for the formation of a functional cuticle and then cell wall in Arabidopsis (The Plant Cell 2…	Brachypodium distachyon	XLOC_034426	TCONS_00056899	9.29556	0.00589247	24Fe/UT
chr3	MLOC_70638	Gigantea 2; GIGANTEA (GI), CONSTANS (CO), and FLOWERING LOCUS T (FT) promotes flowering specifically under long days. Within this pathway, GI regulates circadian rhythms and flowering and acts earlier in the hierarchy than CO and FT (see The Plant Cell 2005, 17:2255-2270). Iron also is involved in the maintenance of circadian period length in Arabidopsis1,2[ ; Plant Physiology 2013, 161:1409-1420…	Triticum aestivum	XLOC_034436	TCONS_00056940	-9.61999	0.00486437	24Fe/UT
chr3	MLOC_70638	Gigantea 2; GIGANTEA (GI), CONSTANS (CO), and FLOWERING LOCUS T (FT) promotes flowering specifically under long days. Within this pathway, GI regulates circadian rhythms and flowering and acts earlier in the hierarchy than CO and FT (see The Plant Cell 2005, 17:2255-2270). Iron also is involved in the maintenance of circadian period length in Arabidopsis1,2[ ; Plant Physiology 2013, 161:1409-1420…	Triticum aestivum	XLOC_034436	TCONS_00056941	9.14381	0.006764	24Fe/UT
chr3	MLOC_10919	Beta-1,3-glucanase-like protein, glucan endo-1,3-beta-glucosidase 7-like; involved in catalysis of the hydrolysis of (1->3)-beta-D-glucosidic linkages in (1->3)-beta-D-glucans and then likely in defence mechanisms (see Phytochemistry 2008, 69:1795-1813)	Oryza sativa, Brachypodium distachyon	XLOC_034447	TCONS_00056973	9.29556	0.00589247	24Fe/UT
chr3	MLOC_10919	Beta-1,3-glucanase-like protein, glucan endo-1,3-beta-glucosidase 7-like; involved in catalysis of the hydrolysis of (1->3)-beta-D-glucosidic linkages in (1->3)-beta-D-glucans and then likely in defence mechanisms (see Phytochemistry 2008, 69:1795-1813)	Oryza sativa, Brachypodium distachyon	XLOC_034447	TCONS_00056974	-10.7084	0.00212696	24Fe/UT
chr3	MLOC_71848	Putative RPA2_DBD_D family member; OB-fold nucleic acid binding domain ;This family contains OB-fold domains that bind to nucleic acids. The family includes the anti-codon binding domain of lysyl, aspartyl, and asparaginyl -tRNA synthetases (See pfam00152). Aminoacyl-tRNA synthetases catalyze the addition of an amino acid to the appropriate tRNA molecule EC:6.1.1.-. This family also includes part…		XLOC_034526	TCONS_00057327	-9.94156	0.00338112	24Fe/UT
chr3	MLOC_7183	Coatomer subunit beta-2-like isoform 1, Beta'-coat protein 2; The coatomer is a cytosolic protein complex that binds to dilysine motifs and reversibly associates with Golgi non-clathrin-coated vesicles, which further mediate biosynthetic protein transport from the ER, via the Golgi up to the trans Golgi network. Coatomer complex is required for budding from Golgi membranes, and is essential for t…	Brachypodium distachyon	XLOC_034651	TCONS_00057853	10.6025	0.0021744	24Fe/UT
chr3	MLOC_7183	Coatomer subunit beta-2-like isoform 1, Beta'-coat protein 2; The coatomer is a cytosolic protein complex that binds to dilysine motifs and reversibly associates with Golgi non-clathrin-coated vesicles, which further mediate biosynthetic protein transport from the ER, via the Golgi up to the trans Golgi network. Coatomer complex is required for budding from Golgi membranes, and is essential for t…	Brachypodium distachyon	XLOC_034651	TCONS_00057854	-11.3653	0.0017153	24Fe/UT
chr3	MLOC_51086	IAA-amino acid hydrolase ILR1-like protein 1; an endoplasmic reticulum lumen protein that hydrolyzes certain amino acid conjugates of the plant growth regulator indole-3-acetic acid (IAA). ILR1, an amidohydrolase that releases active indole-3-acetic acid from conjugates (Science 1995, 268:1745-8).	Aegilops tauschii	XLOC_034740	TCONS_00058173	5.96896	0.00793516	24Fe/UT
chr3	MLOC_51086	IAA-amino acid hydrolase ILR1-like protein 1; an endoplasmic reticulum lumen protein that hydrolyzes certain amino acid conjugates of the plant growth regulator indole-3-acetic acid (IAA). ILR1, an amidohydrolase that releases active indole-3-acetic acid from conjugates (Science 1995, 268:1745-8).	Aegilops tauschii	XLOC_034740	TCONS_00058177	-9.72047	0.00434801	24Fe/UT
chr3	MLOC_52176	Putative protein phosphatase 2C06; involved in response to cold, heat, water deprivation, osmotic stress, photoinhibition, negative regulation of abscisic acid mediated signaling pathway, and localized in the nucleus. It Binds 2 magnesium or manganese ions per subunit. Belongs to the PP2C family. The protein phosphatase 2Cs (PP2Cs) from various organisms have been implicated to act as negative mo…	Triticum urartu	XLOC_034760	TCONS_00058239	9.2438	0.00624155	24Fe/UT
chr3	MLOC_20377	Autophagy-related protein 7, Ubiquitin-like modifier-activating enzyme atg7; E1-like activating enzyme involved in the 2 ubiquitin-like systems required for cytoplasm to vacuole transport (Cvt) and autophagy. Activates ATG12 for its conjugation with ATG5 and ATG8 for its conjugation with phosphatidylethanolamine. Both systems are needed for the ATG8 association to Cvt vesicles and autophagosomes.…	Triticum urartu	XLOC_034764	TCONS_00058267	9.27851	0.00589541	24Fe/UT
chr3	MLOC_11772	RING finger and CHY zinc finger domain-containing protein 1 (zinc ion binding); it mediates E3-dependent ubiquitination and proteasomal degradation of target proteins, including p53/TP53, P73, HDAC1 and CDKN1B in human.	Triticum urartu	XLOC_034959	TCONS_00059112	-9.12889	0.00688464	24Fe/UT
chr3	MLOC_17505	Myosin-J heavy chain-like isoform X4; The plant myosins are believed to be involved in various cellular functions in such as cytoplasmic streaming or nuclear, organelle and vesicle transport, cytokinesis, membrane trafficking, signal transduction and intercellular communication through the plasmodesmata (see The Plant Cytoskeleton, Advances in Plant Biology 2).	Setaria italica	XLOC_035074	TCONS_00059510	9.15319	0.00673364	24Fe/UT
chr3	MLOC_57395	Sn1-specific diacylglycerol lipase alpha (Dagla); catalyzes the hydrolysis of diacylglycerol (DAG) to 2-arachidonoyl-glycerol (2-AG), the most abundant endocannabinoid in tissues. This isoform is a chloroplast localized protein predicted by PlantLoc server.	Aegilops tauschii	XLOC_035371	TCONS_00060588	9.5931	0.00494892	24Fe/UT
chr3	MLOC_54055	Homeobox protein LUMINIDEPENDENS-like; seems to play a role in the regulation of flowering time in the autonomous flowering pathway by repressing FLOWERING LOCUS C expression (Plant J, 1999, 18:195-203). Mutant plants show late flowering phenotype (Plant Cell, 1994, 6:75-83).	Brachypodium distachyon	XLOC_035536	TCONS_00061215	-8.94941	0.00803954	24Fe/UT
chr3	MLOC_54055	Homeobox protein LUMINIDEPENDENS-like; seems to play a role in the regulation of flowering time in the autonomous flowering pathway by repressing FLOWERING LOCUS C expression (Plant J, 1999, 18:195-203). Mutant plants show late flowering phenotype (Plant Cell, 1994, 6:75-83).	Brachypodium distachyon	XLOC_035536	TCONS_00061217	9.77426	0.0040331	24Fe/UT
chr3	XLOC_035643	Carbon catabolite-derepressing protein kinase, RKIN1, SnRK1-type protein kinase, sucrose non-fermenting 1-related protein kinase; essential for release from glucose repression. A cDNA, cRKIN1, encods a putative homologue of the yeast (Saccharomyces cerevisiae) SNF1-encoded protein-serine/threonine kinase (PNAS October 1, 1991 vol. 88 no. 19 8602-8605 ). glucose repression: Catabolite repression w…	Aegilops tauschii	XLOC_035643	TCONS_00061585	-8.84556	0.00222212	24Fe/UT
chr3	XLOC_035643	Carbon catabolite-derepressing protein kinase, RKIN1, SnRK1-type protein kinase, sucrose non-fermenting 1-related protein kinase; essential for release from glucose repression. A cDNA, cRKIN1, encods a putative homologue of the yeast (Saccharomyces cerevisiae) SNF1-encoded protein-serine/threonine kinase (PNAS October 1, 1991 vol. 88 no. 19 8602-8605 ). glucose repression: Catabolite repression w…	Aegilops tauschii	XLOC_035643	TCONS_00061591	10.4085	0.00222212	24Fe/UT
chr3	MLOC_5484	Villin-2 (VLN2); Ca2+ regulated actin-binding protein. Arabidopsis VILLIN2 and VILLIN3 act redundantly (see Plant J 2012, 71:962-75; Plant Physiology 2012, 158:1426-1438). This isoform has 393 extra amino acids at C-terminal.	Triticum urartu	XLOC_035652	TCONS_00061604	-8.69964	0.00895079	24Fe/UT
chr3	XLOC_035691	E3 ubiquitin-protein ligase RGLG1-like; E3 ubiquitin-protein ligase that mediates the formation of 'Lys-63'-linked multiubiquitin chains. Regulates apical dominance by acting on the auxin transport proteins abundance. Lys-63-linked multiubiquitin chains play important roles in signal transduction in yeast and in mammals, but the functions for this type of chain in plants remain to be defined. The…	Brachypodium distachyon	XLOC_035691	TCONS_00061742	9.47086	0.005348	24Fe/UT
chr3	MLOC_4058	Dehydration-induced 19-like protein 5 (DI19-5); Arabidopsis AtDi19 gene family encodes a novel type of Cys2/His2 zinc-finger protein implicated in ABA-independent dehydration, high-salinity stress and light signaling pathways (see Plant Mol Biol. 2006 May;61(1-2):13-30).	Triticum urartu	XLOC_035745	TCONS_00061951	-10.7995	0.00200764	24Fe/UT
chr3	MLOC_61000	PG1, Polygalacturonase 1; involved in pectin degradation and cell-cell lossing (Journal of Experimental Botany 2007, 58:1151-1160).		XLOC_035819	TCONS_00062234	-8.62183	0.00934116	24Fe/UT
chr3	MLOC_71849	Uncharacterized		XLOC_036215	TCONS_00063823	10.9587	0.00188645	24Fe/UT
chr3	MLOC_52139	Shaggy-related protein kinase alpha-like, ASK-alpha, ASK1; Arabidopsis thaliana SHAGGY-related protein kinases (AtSK11 and 12) function in perianth and gynoecium development(Plant J 2000, 21:419-29). Stress-induced GSK3 ALPHA regulates the redox stress response by phosphorylating glucose-6-phosphate dehydrogenase in Arabidopsis (Plant Cell 2012, 24:3380-92). Glc-6-phosphate dehydrogenase (G6PD; E…	Brachypodium distachyon	XLOC_036373	TCONS_00064424	8.66878	0.00934116	24Fe/UT
chr3	MLOC_62245	SCY1-like protein 2, Coated vesicle-associated kinase of 104 kDa; component of AP2-containing clathrin coated structures at the plasma membrane or of endocytic coated vesicles. May be a serine/threonine-protein kinase. May regulate clathrin-dependent trafficking between the TGN and/or the endosomal system.	Triticum urartu	XLOC_036406	TCONS_00064538	10.2115	0.00247335	24Fe/UT
chr3	XLOC_036442	18S ribosomal RNA	Secale cereale	XLOC_036442	TCONS_00064674	-1.01205	0.000834608	24Fe/UT
chr3	MLOC_61338	Glycerophosphodiester phosphodiesterase GDE1-like isoform 2; involved in a Pi stress-induced phospholipid degradation pathway in cluster roots (see Plant Physiol 2011, 156:1131-48). Likely involved in anandamide biosynthesis (see J Biol Chem. 2008 Apr 4;283(14):9341-9.	Brachypodium distachyon	XLOC_036819	TCONS_00066279	8.69471	0.00895079	24Fe/UT
chr3	MLOC_61338	Glycerophosphodiester phosphodiesterase GDE1-like isoform 2; involved in a Pi stress-induced phospholipid degradation pathway in cluster roots (see Plant Physiol 2011, 156:1131-48). Likely involved in anandamide biosynthesis (see J Biol Chem. 2008 Apr 4;283(14):9341-9.	Brachypodium distachyon	XLOC_036819	TCONS_00066283	-9.20557	0.00645734	24Fe/UT
chr3	MLOC_70167	Probable inactive serine/threonine-protein kinase scy1-like; may regulate clathrin-dependent trafficking between the TGN and/or the endosomal system.		XLOC_036829	TCONS_00066320	-9.44127	0.005348	24Fe/UT
chr3	MLOC_67858	Receptor-like protein kinase HSL1; it shows decreased expression shortly before the onset of abscission (Plant Cell 2008, 20:1805-1817). Similarly to INFLORESCENCE DEFICIENT IN ABSCISSION mutants (ida), a double mutant between the receptor-like kinases (RLKs) HAESA (HAE) and HAESA-LIKE2 (HSL2) displays nonabscising flowers. Neither overexpression of IDA nor synthetic EPIP or EPIP-C peptides could…	Aegilops tauschii	XLOC_036843	TCONS_00066373	-8.63539	0.00247335	24Fe/UT
chr3	MLOC_59941	Multidrug resistance associated protein MRP2, ABC transporter C family member 3; as an ATP-binding cassette transporter MRP2 (ABCC2) accepts a diverse range of substrates, including glutathione, glucuronide, and sulfate conjugates of many endo- and xenobiotics. MRP2 generally performs excretory or protective roles (J Pharmacol Exp Ther 2002, 302:407-15). Involved in vacuolar sequstration amd degr…	Triticum aestivum, Triticum urartu	XLOC_036937	TCONS_00066700	9.04647	0.00725957	24Fe/UT
chr3	XLOC_037050	Glycogenin-1, GYG1; self-glucosylates, via an inter-subunit mechanism, to form an oligosaccharide primer that serves as substrate for glycogen synthase. Catalyzes UDP-alpha-D-glucose + glycogenin = UDP + alpha-D-glucosylglycogenin. Glycogen is the analogue of starch, a glucose polymer in plants, and is sometimes referred to as animal starch, having a similar structure to amylopectin but more exte…	Triticum urartu	XLOC_037050	TCONS_00067098	8.92027	0.00831085	24Fe/UT
chr3	XLOC_037050	Glycogenin-1, GYG1; self-glucosylates, via an inter-subunit mechanism, to form an oligosaccharide primer that serves as substrate for glycogen synthase. Catalyzes UDP-alpha-D-glucose + glycogenin = UDP + alpha-D-glucosylglycogenin. Glycogen is the analogue of starch, a glucose polymer in plants, and is sometimes referred to as animal starch, having a similar structure to amylopectin but more exte…	Triticum urartu	XLOC_037050	TCONS_00067099	-9.33799	0.00579475	24Fe/UT
chr3	MLOC_55542	Serine carboxypeptidase 1 (CBP1); most SCPs have a signal sequence that directs their translocation into the secretory pathway and are believed to be vacuolar, since they are active at acidic pH. However, one Arabidopsis SCP, Brassinosteroid Insensitive1 Suppressor (BRS1), has been shown to be located outside the cell. When overexpressed, BRS1 interferes with the brassinosteroid signaling pathway…		XLOC_037151	TCONS_00067445	-10.3706	0.00222212	24Fe/UT
chr3	MLOC_55208	F_Box memer protein; a large family of plant domains, with several hundred members in Arabidopsis thaliana. Most examples are found C-terminal to an F-box (pfam00646), a 60 amino acid motif involved in ubiquitination of target proteins to mark them for degradation. Two-hybid experiments support the idea that most members are interchangeable F-box subunits of SCF E3 complexes. Some members have tw…		XLOC_037193	TCONS_00067601	-8.91067	0.00845932	24Fe/UT
chr3	MLOC_12826	Vacuolar protein sorting-associated protein 55 homolog; it is likely is involved in degradation of proteins. This isoform does not have the secretory pathway signal peptide predicted by DTU-CBS server.	Brachypodium distachyon	XLOC_037360	TCONS_00068146	-9.39524	0.00555019	24Fe/UT
3HL	XLOC_042786	Zinc-metallopeptidase, peroxisomal, PXM16; peptidase that might be involved in pathogen or wound response. Not required for peroxisome biogenesis, indole-3-butyric acid (IBA) metabolism, fatty acid beta-oxidation or degradation of glyoxylate cycle enzymes during seedling development.	Triticum urartu	XLOC_042786	TCONS_00073705	8.61547	0.00944063	24Fe/UT
3HL	BKIN12	Protein serine/threonine kinase activity, ATP-binding, SnRK1-type protein kinase		XLOC_042857	TCONS_00074025	9.98858	0.00326714	24Fe/UT
3HL	XLOC_043102	Long chain acyl-CoA synthetase 4-like; the long-chain acyl-CoA synthetase (ACSL), fatty acid transport protein (FATP), and bubblegum (ACSBG) subfamilies activate long-chain and very-long-chain fatty acids to form acyl-CoAs. Gain- and loss-of-function studies show marked differences in the ability of these enzymes to channel fatty acids into different pathways of complex lipid synthesis. Further, …	Brachypodium distachyon	XLOC_043102	TCONS_00074704	-9.0479	0.00725957	24Fe/UT
3HL	MLOC_37373	Tubby-like F-box protein 3 (TULP3); plasma membrane protein, (see Plant Physiology 2004, 134:1586-1597; FEBS Journal 2008, 275:163-171). It is involved in response to bacterial infection (see Plant Cell Rep 2009, 28:113-121). A transcription factor involved in stress response in Arabidopsis.	Triticum urartu	XLOC_043114	TCONS_00074732	9.3124	0.00589247	24Fe/UT
3HS	MLOC_70075	Splicing regulatory glutamine/lysine-rich protein 1 (SREK1); participates in the regulation of alternative splicing by modulating the activity of other splice facors.	Triticum urartu	XLOC_047887	TCONS_00080755	-9.12889	0.00688464	24Fe/UT
chr4	PAP-20	Cathepsin B, Papain-like cysteine proteinase; cathepsin cleavage of sirtuin 1 in endothelial progenitor cells mediates stress-induced premature senescence (Am J Pathol 2012, 180:973-83). Papain-like cysteine proteases (PLCPs) play crucial roles in plant-pathogen/pest interactions. During these parasitic interactions, PLCPs act on non-self substrates, provoking the selection of counteracting inhib…	Triticum aestivum	XLOC_051618	TCONS_00086151	-9.88938	0.00356407	24Fe/UT
chr4	MLOC_5307	Mitogen-activated protein kinase kinase kinase YODA-like; brassinosteroid-regulated GSK3/Shaggy-like kinases phosphorylate MKK4 (mitogen-activated protein (MAP) kinase kinases), which control stomata development in Arabidopsis thaliana. This reduces MKK4 activity against its substrate MPK6 (mitogen-activated protein 6) [see J Biol Chem. 2013 Mar 15;288(11):7519-27). Arabidopsis MKK4 mediates osmo…	Setaria italica	XLOC_051844	TCONS_00086970	-8.759	0.00978258	24Fe/UT
chr4	MLOC_52203	DNA helicase INO80 complex-1-like protein; DNA helicase and probable main scaffold component of the INO80 complex which remodels chromatin by shifting nucleosomes and is involved in DNA repair. Positive regulator of homologous recombination, but not an essential component of homologous recombination. Not involved in the illegitimate repair pathway (see Mol Cell 2004, 16:479-85). This isoform and …	Aegilops tauschii	XLOC_051899	TCONS_00087139	9.18098	0.00665278	24Fe/UT
chr4	MLOC_52203	DNA helicase INO80 complex-1-like protein; DNA helicase and probable main scaffold component of the INO80 complex which remodels chromatin by shifting nucleosomes and is involved in DNA repair. Positive regulator of homologous recombination, but not an essential component of homologous recombination. Not involved in the illegitimate repair pathway (see Mol Cell 2004, 16:479-85).	Aegilops tauschii	XLOC_051899	TCONS_00087144	-9.49463	0.005348	24Fe/UT
chr4	XLOC_052031	Uncharacterized		XLOC_052031	TCONS_00087562	-9.84212	0.00376777	24Fe/UT
chr4	MLOC_59435	Vacuolar protein-sorting-associated protein 37 homolog 1-like isoform X4; component of the ESCRT-I complex (endosomal sorting complex required for transport I), a regulator of vesicular trafficking process. Required for the sorting of endocytic ubiquitinated cargos into multivesicular bodies (MVBs)[Trends Plant Sci 2006, 11:115-23). MVBs are also prevacuolar compartments involved in the retrograd…	Setaria italica	XLOC_052087	TCONS_00087798	8.86425	0.00898606	24Fe/UT
chr4	MLOC_62839	ACBP2, Acyl-CoA-binding domain-containing protein 2; binds medium- and long-chain acyl-CoA esters with very high affinity. Can interact in vitro with palmitoyl-CoA, but not with oleoyl-CoA. Binds to lead ions (Pb). May function as an intracellular carrier of acyl-CoA esters. Required for proper phospholipid and, to a lower extent, galactolipid composition. Cytosolic acyl-CoA-binding proteins (ACB…	Aegilops tauschii	XLOC_052188	TCONS_00088111	9.45578	0.005348	24Fe/UT
chr4	MLOC_62839	ACBP2, Acyl-CoA-binding domain-containing protein 2; binds medium- and long-chain acyl-CoA esters with very high affinity. Can interact in vitro with palmitoyl-CoA, but not with oleoyl-CoA. Binds to lead ions (Pb). May function as an intracellular carrier of acyl-CoA esters. Required for proper phospholipid and, to a lower extent, galactolipid composition. Cytosolic acyl-CoA-binding proteins (ACB…	Aegilops tauschii	XLOC_052188	TCONS_00088112	-9.42303	0.00535246	24Fe/UT
chr4	MLOC_63231	Metal transporter Nramp3/4-like; predicted to be localized in vacuoles by PlantLoc server.	Brachypodium distachyon	XLOC_052269	TCONS_00088388	-8.63773	0.00944063	24Fe/UT
chr4	MLOC_5787	Glycosyltransferase QUASIMODO1, GAUT8; Alpha-1-4-D-galacturonosyltransferase involved in homogalacturonan (HGA) synthesis, a class of pectin which plays a role in cell adhesion (Planta 2005, 222:613-622).	Aegilops tauschii	XLOC_052272	TCONS_00088392	8.99522	0.00767755	24Fe/UT
chr4	MLOC_71024	Putative magnesium/cobalt efflux protein; this isoform covers the last 209 amino acids of the isoform TCONS_00089434.		XLOC_052559	TCONS_00089433	9.37789	0.0055887	24Fe/UT
chr4	MLOC_71024	Putative magnesium/cobalt efflux protein, it has CBS domain including CorC and CorB domains. Predicted as golgi localized protein by PlantLoc server.		XLOC_052559	TCONS_00089434	9.70577	0.00434801	24Fe/UT
chr4	MLOC_69563	SABRE, HPS4, HYPERSENSITIVE TO PI STARVATION 4; involved in response to ethylene stimulus. The phytohormone ethylene plays important roles in regulating plant responses to phosphate (Pi) starvation. To date, however, no molecular components have been identified that interact with ethylene signalling in regulating such responses. Arabidopsis mutant, hps4 (SABRE), was characterized with enhanced re…	Oryza sativa	XLOC_052823	TCONS_00090396	9.82797	0.00376777	24Fe/UT
chr4	MLOC_53387	Putative leucine-rich repeat-containing protein DDB_G0290503-like isoform X1; the isoform TCONS_00091093 has a SMC-prok-B domain. Chromosome segregation protein SMC, common bacterial type ;SMC (structural maintenance of chromosomes) proteins bind DNA and act in organizing and segregating chromosomes for partition. SMC proteins are found in bacteria, archaea, and eukaryotes. This family represents…	Setaria italica	XLOC_052977	TCONS_00091083	8.80596	0.00945181	24Fe/UT
chr4	MLOC_34505	Myo-inositol monophosphatase 1; dephosphorylates inositol phosphate to inositol as part of the phosphatidylinositol signalling pathway. myo-Inositol-1-phosphate synthase(MIPS1) is a conserved enzyme that catalyzes the first committed and rate-limiting step in inositol biosynthesis. The Arabidopsis mips1 mutants have significantly reduced levels of major phosphatidylinositols and exhibit much slow…		XLOC_053076	TCONS_00091445	-8.759	0.00978258	24Fe/UT
chr4	MLOC_11502	Stress response protein nst1-like isoform X1; NAC transcription factors, NST1 and NST3, are key positive regulators of the formation of secondary walls in woody tissues of Arabidopsis (Plant Cell 2007, 19:270-80).	Setaria italica	XLOC_053102	TCONS_00091526	9.33731	0.00579475	24Fe/UT
chr4	MLOC_65292	Probable galacturonosyltransferase-like 7 (GATL7); may be involved in pectin and/or xylans biosynthesis in cell walls (Proc Natl Acad Sci U S A 2006, 103:5236-41).	Brachypodium distachyon	XLOC_053120	TCONS_00091610	-8.65346	0.0095659	24Fe/UT
chr4	XLOC_053192	26S protease regulatory subunit 4, the 26S protease is involved in the ATP-dependent degradation of ubiquitinated proteins. The regulatory (or ATPase) complex confers ATP dependency and substrate specificity to the 26S complex.	Triticum urartu	XLOC_053192	TCONS_00091874	-8.65346	0.00934116	24Fe/UT
chr4	XLOC_053192	26S protease regulatory subunit 4, the 26S protease is involved in the ATP-dependent degradation of ubiquitinated proteins. The regulatory (or ATPase) complex confers ATP dependency and substrate specificity to the 26S complex.	Triticum urartu	XLOC_053192	TCONS_00091875	8.76982	0.0096841	24Fe/UT
chr4	MLOC_66511	UDP-glucuronic acid decarboxylase 1, UXS1; catalyzes the NAD-dependent decarboxylation of UDP-glucuronic acid to UDP-xylose. Necessary for the biosynthesis of the core tetrasaccharide in glycosaminoglycan biosynthesis (Plant Physiol 2002, 130:2188-98). In woody crop plants, the oligosaccharide components of the cell wall are essential for important traits such as bioenergy content, growth, and st…	Triticum urartu	XLOC_053292	TCONS_00092195	-10.1882	0.00247335	24Fe/UT
chr4	MLOC_70283	PCBP (poly(C) binding proteins)_like_KH, KH domain-containing protein; cytrosolic iron regulates the activity of the microRNA pathway through Poly(C)-Binding Protein 2 (see Cell Metab 2012, 15: 895-904; Science 2008, 320:1207-10; FEBS Journal 2008, 275:2712-2726; THE JOURNAL OF BIOLOGICAL CHEMISTRY 2007, 283:28757-28766,).	Aegilops tauschii	XLOC_053331	TCONS_00092353	9.57924	0.00496106	24Fe/UT
chr4	MLOC_70283	PCBP (poly(C) binding proteins)_like_KH, KH domain-containing protein; cytrosolic iron regulates the activity of the microRNA pathway through Poly(C)-Binding Protein 2 (see Cell Metab 2012, 15: 895-904; Science 2008, 320:1207-10; FEBS Journal 2008, 275:2712-2726; THE JOURNAL OF BIOLOGICAL CHEMISTRY 2007, 283:28757-28766,).	Aegilops tauschii	XLOC_053331	TCONS_00092355	-9.77181	0.0040331	24Fe/UT
chr4	MLOC_4990	Kinesin-4; microtubule-binding motor protein	Aegilops tauschii	XLOC_053370	TCONS_00092498	-9.92221	0.00341633	24Fe/UT
chr4	MLOC_65608	F-box/kelch-repeat protein SKIP11; component of SCF(ASK-cullin-F-box) E3 ubiquitin ligase complexes, which may mediate the ubiquitination and subsequent proteasomal degradation of target proteins.	Triticum urartu	XLOC_053559	TCONS_00093202	-9.44127	0.005348	24Fe/UT
chr4	MLOC_5135	C2 calcium/lipid-binding plant phosphoribosyltransferase, putative anthranilate phosphoribosyltransferase; binds calcium via the C2 domains in absence of phospholipids (J Biol Chem 2005, 280:1641-1651). They have domain ferlins that are involved in vesicle fusion events. Ferlins and other proteins, such as Synaptotagmins, are implicated in facilitating the fusion process when cell membranes fuse …	Oryza sativa, Triticum urartu	XLOC_053613	TCONS_00093386	-6.84211	0.00792771	24Fe/UT
chr4	MLOC_54896	60S ribosomal protein L23-like; with an incomplete L17 domain in this isoform	Brachypodium distachyon	XLOC_053718	TCONS_00093678	-9.71299	0.00434801	24Fe/UT
chr4	MLOC_54896	60S ribosomal protein L23-like	Brachypodium distachyon	XLOC_053718	TCONS_00093679	8.90924	0.00831085	24Fe/UT
4HL	MLOC_38100	CCR4-NOT transcription complex subunit 1-like; scaffolding component of the CCR4-NOT complex which is one of the major cellular mRNA deadenylases and is linked to various cellular processes including bulk mRNA degradation, miRNA-mediated repression, translational repression during translational initiation and general transcription regulation.	Brachypodium distachyon	XLOC_058690	TCONS_00099033	-6.75924	0.00579475	24Fe/UT
4HS	MLOC_51948	MAM3, Metal transporter CNNM4, ACDP4 (a member of Ancient Conserved Domain Protein family), KIAA1592; CNNM4 interacts with the metal ion chaperone COX11 (mitochodrial inner membrane localized "Copper chaperones for cytochrome c oxidase assembly homolog 11") (Mol Pain 2005, 1:15). Recently, mutations in the cyclin M2 (CNNM2) gene were identified to be causative for severe hypomagnesemia (Am J Hum …	Medicago truncatula	XLOC_063287	TCONS_00105145	9.07637	0.00720421	24Fe/UT
4HS	MLOC_51948	MAM3, Metal transporter CNNM4, ACDP4 (a member of Ancient Conserved Domain Protein family), KIAA1592; CNNM4 interacts with the metal ion chaperone COX11 (mitochodrial inner membrane localized "Copper chaperones for cytochrome c oxidase assembly homolog 11") (Mol Pain 2005, 1:15). Recently, mutations in the cyclin M2 (CNNM2) gene were identified to be causative for severe hypomagnesemia (Am J Hum …	Medicago truncatula	XLOC_063287	TCONS_00105147	-9.40456	0.00555019	24Fe/UT
4HS	XLOC_063387	Similar to Basic leucine zipper and W2 domain-containing protein 2	Aegilops tauschii	XLOC_063387	TCONS_00105556	-8.85734	0.00915483	24Fe/UT
4HS	XLOC_063387	Similar to Basic leucine zipper and W2 domain-containing protein 2	Aegilops tauschii	XLOC_063387	TCONS_00105558	10.0601	0.00294558	24Fe/UT
4HS	MLOC_57586	Protein transport protein sec-23-like; involved in ER to Golgi vesicle-mediated transport	Brachypodium distachyon	XLOC_063721	TCONS_00106439	8.7075	0.00934116	24Fe/UT
4HS	XLOC_063790	Myo-inositol monophosphatase 1; responsible for the provision of inositol required for synthesis of phosphatidylinositol and polyphosphoinositides. Catalyzes Myo-inositol phosphate + H2O = myo-inositol + phosphate. The phosphatidylinositol can be phosphorylated to form phosphatidylinositol phosphate (PIP), phosphatidylinositol bisphosphate (PIP2) and phosphatidylinositol trisphosphate (PIP3). PIP…	Triticum aestivum	XLOC_063790	TCONS_00106711	10.6889	0.00212696	24Fe/UT
4HS	MLOC_67940	DELLA protein; DELLA proteins, consisting of GA INSENSITIVE, REPRESSOR OF GA1-3, RGA-LIKE1 (RGL1), RGL2, and RGL3, are central repressors of gibberellin (GA) responses. the DELLA and BOI proteins inhibit GA responses by interacting with each other, binding to the same promoters of GA-responsive genes, and repressing these genes (see The Plant Cell March 2013 tpc.112.108951, doi: http:/​/​dx.​doi.…	Triticum aestivum	XLOC_063930	TCONS_00107184	-9.4503	0.005348	24Fe/UT
4HS	XLOC_066170	25S ribosomal RNA; a component of the large (60S) ribosomal subunit.		XLOC_066170	TCONS_00109530	-2.59317	0.00027316	24Fe/UT
chr5	MLOC_73672	Malate dehydrogenase (glyoxysomal); catalyze the NAD/NADH-dependent interconversion of the substrates malate and oxaloacetate. This reaction plays a key part in the malate/aspartate shuttle across the mitochondrial membrane, and in the tricarboxylic acid cycle within the mitochondrial matrix (see Gen Physiol Biophys 2002, 21:257-65). Glyoxysomes are unique to plant cells and house, in addition to…	Oryza sativa	XLOC_067164	TCONS_00110589	9.91878	0.00341633	24Fe/UT
chr5	MLOC_73672	Malate dehydrogenase (glyoxysomal); catalyze the NAD/NADH-dependent interconversion of the substrates malate and oxaloacetate. This reaction plays a key part in the malate/aspartate shuttle across the mitochondrial membrane, and in the tricarboxylic acid cycle within the mitochondrial matrix (see Gen Physiol Biophys 2002, 21:257-65). Glyoxysomes are unique to plant cells and house, in addition to…	Oryza sativa	XLOC_067164	TCONS_00110590	-9.54609	0.00500607	24Fe/UT
chr5	MLOC_73672	Malate dehydrogenase (glyoxysomal); catalyze the NAD/NADH-dependent interconversion of the substrates malate and oxaloacetate. This reaction plays a key part in the malate/aspartate shuttle across the mitochondrial membrane, and in the tricarboxylic acid cycle within the mitochondrial matrix (see Gen Physiol Biophys 2002, 21:257-65). Glyoxysomes are unique to plant cells and house, in addition to…	Oryza sativa	XLOC_067164	TCONS_00110592	-8.82992	0.00918833	24Fe/UT
chr5	MLOC_73672	Malate dehydrogenase (glyoxysomal); catalyze the NAD/NADH-dependent interconversion of the substrates malate and oxaloacetate. This reaction plays a key part in the malate/aspartate shuttle across the mitochondrial membrane, and in the tricarboxylic acid cycle within the mitochondrial matrix (see Gen Physiol Biophys 2002, 21:257-65). Glyoxysomes are unique to plant cells and house, in addition to…	Oryza sativa	XLOC_067164	TCONS_00110596	8.60183	0.00958026	24Fe/UT
chr5	XLOC_067165	TaENO-a enolase, Enolase, which is an enzyme involved in glycolysis, converts 2-phospho-D-glycerate to phosphoenolpyruvate, is present as multiple isoforms in most of the higher plants. in abiotic stress tolerance in plants. Enolase transcripts have been reported to increase in response to low and high temperatures, salt stress and anaerobic conditions in Mesembryanthemum crystallinum and in resp…	Triticum aestivum	XLOC_067165	TCONS_00110603	-8.80197	0.00945181	24Fe/UT
chr5	MLOC_76000	Methionine synthase 1; cobalamin (B12)-independent methionine synthase, MetE, catalyses the synthesis of the amino acid methionine by the transfer of a methyl group from methyltetrahydrofolate to homocysteine. Barley endosperm development can be subdivided into the pre-storage, intermediate, storage and desiccation phase. Nothing is known about DNA methylation events involved in different endospe…		XLOC_067251	TCONS_00110836	-9.46819	0.005348	24Fe/UT
chr5	MLOC_76000	Methionine synthase 1; cobalamin (B12)-independent methionine synthase, MetE, catalyses the synthesis of the amino acid methionine by the transfer of a methyl group from methyltetrahydrofolate to homocysteine. Barley endosperm development can be subdivided into the pre-storage, intermediate, storage and desiccation phase. Nothing is known about DNA methylation events involved in different endospe…		XLOC_067251	TCONS_00110838	-9.22675	0.00637262	24Fe/UT
chr5	MLOC_59658	Ankyrin-3, involved in golgi to plasma membrane protein transport and their maintenance.	Aegilops tauschii	XLOC_067430	TCONS_00111611	9.28706	0.00589541	24Fe/UT
chr5	MLOC_59658	Ankyrin-3, involved in golgi to plasma membrane protein transport and their maintenance.	Aegilops tauschii	XLOC_067430	TCONS_00111620	9.14381	0.006764	24Fe/UT
chr5	MLOC_43149	RAPTOR, Regulatory-associated protein of Mtor, p150 target of rapamycin (TOR)-scaffold protein; involved in the control of the mammalian target of rapamycin complex 1 (mTORC1) activity which regulates cell growth and survival, and autophagy in response to nutrient and hormonal signals; functions as a scaffold for recruiting mTORC1 substrates. mTORC1 is activated in response to growth factors or a…	Aegilops tauschii	XLOC_067609	TCONS_00112282	-9.05975	0.00725562	24Fe/UT
chr5	MLOC_76624	UBX domain-containing protein 6-like; UBXD1 is a VCP-interacting protein that is involved in ER-associated degradation. AAA ATPase VCP and its yeast ortholog Cdc48, in a complex with the Ufd1-Npl4 heterodimer as an adaptor, play an essential role in endoplasmic reticulum-associated degradation (ERAD). Several UBX domain-containing proteins function to recruit ubiquitylated substrates to VCP/Cdc48…	Brachypodium distachyon	XLOC_067801	TCONS_00113038	-9.18407	0.00665278	24Fe/UT
chr5	MLOC_72490	Putative serine protease do-like protein (htrA); might be efficient in the degradation of transiently denatured and unfolded proteins which accumulate in the periplasm following stress conditions.	Triticum urartu	XLOC_067886	TCONS_00113298	-8.62183	0.00934116	24Fe/UT
chr5	XLOC_068718	Probable cellulose synthase A catalytic subunit 5 [UDP-forming]-like, CESA5; catalytic subunit of cellulose synthase terminal complexes ('rosettes'), required for beta-1,4-glucan microfibril crystallization, a major mechanism of the cell wall formation.	Brachypodium distachyon	XLOC_068718	TCONS_00116263	9.36179	0.00567002	24Fe/UT
chr5	MLOC_70613	2-aminoethanethiol dioxygenase; Cysteamine dioxygenase; it adds two atoms of oxygen to free cysteamine (2-aminoethanethiol) to form hypotaurine. Cysteamine, is produced as a consequence of the degradation of coenzyme A. Elimination of iron binding by mutation of His-95, a strictly conserved putative metal coordinating residue, produced a catalytically inactive protein. Cysteine is used for many m…	Triticum urartu	XLOC_068948	TCONS_00117075	-8.69964	0.00895079	24Fe/UT
chr5	MLOC_73966	Homocysteine S-methyltransferase 3; only the last two exons of the gene (last 79 amino acids) are covered by this isoform. Catalyzes methyl transfer from S-methylmethionine (SMM) to adenosyl-L-homocysteine (AdoMet). SMM degradation (by HMT-1, HMT-2, HMT-3 and HMT-4) and biosynthesis (by MMT1) constitute the SMM cycle in plants, which is probably required to achieve short term control of AdoMet le…	Aegilops tauschii	XLOC_069035	TCONS_00117410	11.93	0.00139492	24Fe/UT
chr5	XLOC_069405	Probable protein phosphatase 2C 67-like	Brachypodium distachyon	XLOC_069405	TCONS_00118698	8.9742	0.00792771	24Fe/UT
chr5	MLOC_10405	Phosphoenolpyruvate carboxylase (PEPC) 2, involved in carbon dioxide fixation (photosynthesis); it uses magnesium as cofactor and found in cytosol and apoplatic environment. After conversion of CO2 to bicarbonate by carbonic anhydrase, PEP carboxylase assimilates the available bicarbonate into a four-carbon compound (oxaloacetate, which is further converted to malate) that can be stored or shuttl…		XLOC_069441	TCONS_00118812	-1.80392	0.00978966	24Fe/UT
chr5	HIR3	Hypersensitive induced response protein 3, HIR3; self-interacts and forms heteromers. Interacts with NB-LRR class of R proteins before R proteins (e.g. RPS2 or RPM1) are activated by the effectors (Proteomics 2007, 6:1980-96; Mol Cell Proteomics 2004, 3:675-91; Plant Cell Physiol 2004, 45:1543-1556). Arabidopsis RPS2 is a typical nucleotide-binding leucine-rich repeat resistance protein, which in…	Triticum aestivum	XLOC_069552	TCONS_00119198	9.18098	0.00665278	24Fe/UT
chr5	HIR3	Hypersensitive induced response protein 3, HIR3; self-interacts and forms heteromers. Interacts with NB-LRR class of R proteins before R proteins (e.g. RPS2 or RPM1) are activated by the effectors (Proteomics 2007, 6:1980-96; Mol Cell Proteomics 2004, 3:675-91; Plant Cell Physiol 2004, 45:1543-1556). Arabidopsis RPS2 is a typical nucleotide-binding leucine-rich repeat resistance protein, which in…	Triticum aestivum	XLOC_069552	TCONS_00119199	8.72018	0.00934116	24Fe/UT
chr5	HIR3	Hypersensitive induced response protein 3, HIR3; self-interacts and forms heteromers. Interacts with NB-LRR class of R proteins before R proteins (e.g. RPS2 or RPM1) are activated by the effectors (Proteomics 2007, 6:1980-96; Mol Cell Proteomics 2004, 3:675-91; Plant Cell Physiol 2004, 45:1543-1556).Arabidopsis RPS2 is a typical nucleotide-binding leucine-rich repeat resistance protein, which ind…	Triticum aestivum	XLOC_069552	TCONS_00119202	-10.3706	0.00222212	24Fe/UT
chr5	MLOC_72011	Aldehyde dehydrogenase family 7 member A1, Antiquitin-1; induced by osmotic pressure changes (see Plant Cell Physiol 1999, 40:198-204). Catalytic activity: An aldehyde + NAD+ + H2O = a carboxylate + NADH. Involved in stress response and increase the tolerance (see The Plant Journal 2003, 35: 452-464; Plant Cell and Environment 2006, 29:1033-1048). Arabidopsis ALDH3I1 and ALDH7B4 not only function…	Aegilops tauschii	XLOC_069557	TCONS_00119221	-8.58949	0.00958026	24Fe/UT
chr5	MLOC_15992	Beta-glucosidase 31; hydrolysis of terminal, non-reducing beta-D-glucosyl residues with release of beta-D-glucose. Glycosyl hydrolase family 1 (GH1) beta-glucosidases have been implicated in physiologically important processes in plants, such as response to biotic and abiotic stresses, defense against herbivores, activation of phytohormones, lignification, and cell wall remodeling. Plant GH1 beta…	Triticum urartu	XLOC_069760	TCONS_00119938	-10.0225	0.00311606	24Fe/UT
chr5	MLOC_39143	Cytosolic purine 5'-nucleotidase-like; may have a critical role in the maintenance of a constant composition of intracellular purine/pyrimidine nucleotides in cooperation with other nucleotidases. Preferentially hydrolyzes inosine 5'-monophosphate (IMP) and other purine nucleotides. Ligand: Magnesium.	Brachypodium distachyon	XLOC_070119	TCONS_00121267	2.4481	0.00805506	24Fe/UT
chr5	MLOC_39143	Cytosolic purine 5'-nucleotidase-like; may have a critical role in the maintenance of a constant composition of intracellular purine/pyrimidine nucleotides in cooperation with other nucleotidases. Preferentially hydrolyzes inosine 5'-monophosphate (IMP) and other purine nucleotides. Ligand: Magnesium.	Brachypodium distachyon	XLOC_070119	TCONS_00121270	-10.3024	0.00228376	24Fe/UT
chr5	MLOC_66554	RCD1 protein ; the Radical-induced Cell Death1 (RCD1) protein is a regulator of both developmental and stress responses in Arabidopsis thaliana and it interacts with several transcription factors. Its closest homolog, SRO1, seems to be dispensable for proper plant responses but the hardly viable phenotype of the rcd1 sro1 double mutant reveals that it encodes a functional protein that can partial…		XLOC_070500	TCONS_00122529	-9.42303	0.00535246	24Fe/UT
5HL	MLOC_12376	Trafficking protein particle complex subunit 8; see Mol Biol Cell 2011, 22:2083-93.	Triticum urartu	XLOC_076799	TCONS_00130456	-8.77346	0.0096841	24Fe/UT
5HL	MLOC_72618	ADP-ribosylation factor; may involved in intracellular trafficking and maintenance of endoplasmic reticulum morphology (Plant Physiology 2002, 129:4 1507-1520).	Zea mays	XLOC_076827	TCONS_00130556	-8.74438	0.00988683	24Fe/UT
5HS	XLOC_081314	Uncharacterized		XLOC_081314	TCONS_00135714	8.7075	0.00934116	24Fe/UT
5HS	MLOC_14592	PH-interacting protein, WD repeat-containing protein 11; stimulates cell proliferation through regulation of cyclin transcription and has an anti-apoptotic activity through AKT1 phosphorylation and activation.	Triticum urartu	XLOC_081379	TCONS_00135915	-9.56284	0.00498104	24Fe/UT
5HS	MLOC_51930	Ocs-element binding factor 1; The ocs-elements comprise a family of related 20-base pair DNA sequences with dyad symmetry that are functional components of the promoters of several genes introduced into the plant nucleus by Agrobacterium transformation or infection by DNA viruses. We describe the isolation and characterization of a maize cDNA that encodes a protein, OCSBF-1, that binds specifical…	Secale cereale	XLOC_081741	TCONS_00136716	-1.60042	0.00258865	24Fe/UT
chr6	MLOC_73159	Calnexin-like protein; a calcium-binding protein that interacts with newly synthesized glycoproteins in the endoplasmic reticulum. It may act in assisting protein assembly and/or in the retention within the ER of unassembled protein subunits. It seems to play a major role in the quality control apparatus of the ER by the retention of incorrectly folded proteins.	Aegilops tauschii	XLOC_084468	TCONS_00140228	-9.08316	0.00720421	24Fe/UT
chr6	MLOC_12747	Ethylene-responsive transcription factor WIN1; promotes cuticle formation by inducing the expression of enzymes involved in wax biosynthesis. Confers drought resistance. Acts as a transcriptional activator. Binds to the GCC-box pathogenesis-related promoter element. May be involved in the regulation of gene expression by stress factors and by components of stress signal transduction pathways (Pro…	Triticum urartu	XLOC_084585	TCONS_00140636	-8.66901	0.00940921	24Fe/UT
chr6	MLOC_74702	Protein kinase APK1A, chloroplastic; a dual-specificity kinase that phosphorylate both Ser/Thr and Tyr residues.	Aegilops tauschii	XLOC_084662	TCONS_00140901	-9.30849	0.00589247	24Fe/UT
chr6	MLOC_53294	Putative ADP-ribosylation factor GTPase-activating protein AGD14, Protein ARF-GAP DOMAIN 14, Protein ZIGA4, AGD14; Involved in intracellular trafficking (Proc Natl Acad Sci U S A 2012, 109:11443-8; The Plant Cell 20:142-151; Plant Physiology 2003, 131:1191-1208; The Plant Cell March 2011, 23:3 846-849) ; cell migration is central to normal physiology in embryogenesis, the inflammatory response an…	Aegilops tauschii	XLOC_084771	TCONS_00141255	-6.22781	0.00895865	24Fe/UT
chr6	XLOC_084806	Putative GAG-POL precursor; reverse transcriptases (RTs) from retrotransposons and retroviruses which have long terminal repeats (LTRs) in their DNA copies but not in their RNA template. RT catalyzes DNA replication from an RNA template.	Aegilops tauschii	XLOC_084806	TCONS_00141406	-8.82992	0.00918833	24Fe/UT
chr6	XLOC_084808	Putative non-LTR retroelement reverse transcriptase; RT_nLTR: Non-LTR (long terminal repeat) retrotransposon and non-LTR retrovirus reverse transcriptase (RT). This subfamily contains both non-LTR retrotransposons and non-LTR retrovirus RTs. RTs catalyze the conversion of single-stranded RNA into double-stranded DNA for integration into host chromosomes. RT is a multifunctional enzyme with RNA-di…	Sorghum bicolor	XLOC_084808	TCONS_00141411	6.91598	0.00494892	24Fe/UT
chr6	MLOC_51108	Cationic amino acid transporter 9 (chloroplastic-like), amino acid permease YfnA-like;	Brachypodium distachyon	XLOC_084978	TCONS_00142027	-9.05975	0.00725562	24Fe/UT
chr6	SDH	Lysine ketoglutarate reductase/saccharopine dehydrogenase; a bifunctional enzyme catalyzing the first two steps of lysine catabolism in animals and plants (J Biol Chem 2002, 277:49655-61). This isoform does not have the last 250 amino acids.	Triticum turgidum	XLOC_085281	TCONS_00143171	-10.4266	0.00222212	24Fe/UT
chr6	SDH	Lysine ketoglutarate reductase/saccharopine dehydrogenase; a bifunctional enzyme catalyzing the first two steps of lysine catabolism in animals and plants (J Biol Chem 2002, 277:49655-61). This isoform has just amino acids 837 to 921.	Triticum turgidum	XLOC_085281	TCONS_00143174	-7.66622	0.0063877	24Fe/UT
chr6	SDH	Lysine ketoglutarate reductase/saccharopine dehydrogenase; a bifunctional enzyme catalyzing the first two steps of lysine catabolism in animals and plants (J Biol Chem 2002, 277:49655-61). This isoform does not have the first 524 amino acids.	Triticum turgidum	XLOC_085281	TCONS_00143176	10.3485	0.00222212	24Fe/UT
chr6	MLOC_75709	Callose synthase 3-like, 1,3-beta-glucan synthase; involved in cell wall biogenesis (see Plant Mol Biol 2005, 58:333-49; Plant Cell 2001, 13:755-68).	Brachypodium distachyon	XLOC_085498	TCONS_00143908	-11.9292	0.00139492	24Fe/UT
chr6	MLOC_66886	BAX inhibitor 1 (pBI-1); Bax Inhibitor-1 is a novel inositol 1,4,5-trisphosphate (IP3) receptor-interacting and -sensitizing protein which may contribute to a decrease in steady-state [Ca2+]ER and mitochondrial bioenergetics and subsequent induction of basal autophagy (see Cell Death and Disease 2012, 3: e367)		XLOC_085689	TCONS_00144496	-9.10621	0.00701507	24Fe/UT
chr6	MLOC_11125	Putative histone acetyltransferase HAC-like 1; Histone acetylation increases gene expression. Plant Cell Physiol. 2014 Feb;55(2):426-35. Involvement of Arabidopsis histone acetyltransferase HAC family genes in the ethylene signaling pathway. Li C, Xu J, Li J, Li Q, Yang H.	Triticum urartu	XLOC_085763	TCONS_00144800	10.3768	0.00222212	24Fe/UT
chr6	MLOC_62722	Cyclin-dependent kinase G-1; Arabidopsis thaliana CYCLIN-DEPEDENT KINASE G1 (CDKG1) belongs to the family of cyclin-dependent protein kinases that were originally characterized as cell cycle regulators in eukaryotes. CDKG1 regulates pre-mRNA splicing of CALLOSE SYNTHASE5 (CalS5) and, therefore, pollen wall formation. The knockout mutant cdkg1 exhibits reduced male fertility with impaired callose …	Triticum urartu	XLOC_086038	TCONS_00145870	-8.81601	0.0093696	24Fe/UT
chr6	MLOC_59982	Somatic embryogenesis receptor kinase 2; serine/threonine-kinase involved in brassinosteroid-dependent and -independent signaling pathways. Acts redundantly with SERK1 as a control point for sporophytic development controlling male gametophyte production (Plant Physiol 2008, 148:611-9). SERK1 and SERK2 are essential for male microsporogenesis independent from BR (Plant Physiol 2008, 148:611-9).	Triticum aestivum	XLOC_086061	TCONS_00145955	9.13436	0.00684936	24Fe/UT
chr6	MLOC_50055	Putative WD repeat-containing protein; WD40 domain, found in a number of eukaryotic proteins that cover a wide variety of functions including adaptor/regulatory modules in signal transduction, pre-mRNA processing and cytoskeleton assembly.	Aegilops tauschii	XLOC_086331	TCONS_00147008	-8.78779	0.00959128	24Fe/UT
chr6	MLOC_70155	Oxidation resistance protein 1-like; may be involved in protection from oxidative DNA damage. Stress induction and mitochondrial localization of Oxr1 proteins in yeast and humans (Proc. Natl. Acad. Sci. U.S.A. 2000, 97:14530-14535; Mol. Cell. Biol. 2004, 24:3180-3187). This isofom seems to be an ER localized protein predicted by PlantLoc server.	Brachypodium distachyon	XLOC_086370	TCONS_00147142	-8.72962	0.00895079	24Fe/UT
chr6	MLOC_6134	F-box/kelch-repeat protein SKIP11-like, SKP1-interacting partner 11; component of SCF(ASK-cullin-F-box) E3 ubiquitin ligase complexes, which may mediate the ubiquitination and subsequent proteasomal degradation of target proteins.	Brachypodium distachyon	XLOC_086371	TCONS_00147157	-10.5023	0.00222212	24Fe/UT
chr6	MLOC_57018	5-oxoprolinase (OXP1); catalyzes the cleavage of 5-oxo-L-proline to form L-glutamate coupled to the hydrolysis of ATP to ADP and inorganic phosphate. Acts in the glutathione degradation pathway. GSH turnover in plants: GSH is converted to 5OP and then to glutamate (Glu) by the combined action of gamma-glutamyl cyclotransferase and 5-oxoprolinase in the cytoplasm (Plant Physiol 2008, 148:1603-13).…	Aegilops tauschii	XLOC_086412	TCONS_00147284	-9.0239	0.00759248	24Fe/UT
chr6	MLOC_20250	Kinesin-related protein 11; microtubule-associated force-producing protein that plays a role in organelle transport. Its motor activity is directed toward the microtubule's plus end.	Triticum urartu	XLOC_086485	TCONS_00147535	9.07637	0.00720421	24Fe/UT
chr6	MLOC_53245	Myosin-Va-like; Myosin motor domain, plant-specific type XI myosin, involved in organelle transport. Myosins are actin-dependent molecular motors.	Brachypodium distachyon	XLOC_086645	TCONS_00148077	-9.45927	0.005348	24Fe/UT
chr6	MLOC_61553	Acetyl-coenzyme A synthetase (cytoplasmic); activates acetate so that it can be used for lipid synthesis or for energy generation.	Brachypodium distachyon	XLOC_086647	TCONS_00148080	8.90924	0.00831085	24Fe/UT
chr6	MLOC_61553	Acetyl-coenzyme A synthetase (cytoplasmic); activates acetate so that it can be used for lipid synthesis or for energy generation.	Brachypodium distachyon	XLOC_086647	TCONS_00148081	-8.96209	0.00800713	24Fe/UT
6HL	DEK1	Calpain-3; this isoforn does not have the first 1440 and the last 50 amino acids. The lack of N-terminal region may works instead of the autoproteolysis mediated activation of the enzyme (see The Plant Cell 2008, 20:2619-2630). It is a cysteine protease. Among the new CAPN3 substrates are three E3 SUMO ligases (PLoS ONE 5(8): e11940).	Aegilops tauschii	XLOC_091570	TCONS_00153318	8.7075	0.00927477	24Fe/UT
6HL	MLOC_70531	Putative serine/threonine-protein kinase yakA; general sensor of environmental conditions, such as heat stress, effecting changes through pkaC. Essential for survival to nitrosoative and oxidative stresses. Required for cell cycle control, not only at the onset but also during development (aggregation process and postaggregative development) [see Development 1998, 125; Development 1999, 126:3263-…	Triticum urartu	XLOC_091590	TCONS_00153402	8.90924	0.00831085	24Fe/UT
6HL	XLOC_092129	Uncharacterized		XLOC_092129	TCONS_00154846	-9.03595	0.00747828	24Fe/UT
6HL	XLOC_092129	Uncharacterized		XLOC_092129	TCONS_00154847	8.7075	0.00904619	24Fe/UT
6HL	XLOC_092302	AP-1 complex subunit gamma-2, Adapter-related protein complex 1 subunit gamma-2, Adaptor protein complex AP-1 large subunit gamma-2, Clathrin assembly protein complex 1 gamma-2 large chain Gamma-adaptin 2; Subunit of clathrin-associated adaptor protein complex 1 that plays a role in protein sorting in the late-Golgi/trans-Golgi network (TGN) and/or endosomes. The AP complexes mediate both the rec…	Triticum urartu	XLOC_092302	TCONS_00155192	8.12914	0.00228887	24Fe/UT
6HL	XLOC_095147	Mitochondrial large subunit ribosomal RNA	Chloranthus multistachys	XLOC_095147	TCONS_00158055	-1.64853	0.00506064	24Fe/UT
6HS	MLOC_64853	Puromycin-sensitive aminopeptidase, Cytosol alanyl aminopeptidase (NPEPPS); aminopeptidase with broad substrate specificity for several peptides. Involved in proteolytic events essential for cell growth and viability. Activity is increased by Mg2+ and Ca2+. A major function of proteasomes and macroautophagy is to eliminate misfolded potentially toxic proteins. Mammalian proteasomes, however, cann…	Aegilops tauschii	XLOC_095340	TCONS_00158495	-8.66901	0.00934116	24Fe/UT
6HS	MLOC_67722	GDSL esterase/lipase; these lipases are potentially involved in multiple physiological roles including seed germination, flowering and defense reactions (Pak J Biol Sci 2008, 11:763-7). They are predicted to be extracellularly secreted, or target to mitochondria, chloroplast or any other parts of the cells.	Aegilops tauschii	XLOC_095360	TCONS_00158579	-8.91067	0.00831085	24Fe/UT
6HS	MLOC_65966	MADS-box transcription factor 29; involved in seed development. symplastic continuity, including the ovular vascular trace and the nucellar projection, which is the nutrient source for the filial tissue at early development stages (PLoS One 2012, 7:e51435). The MADS box transcription factors are critical regulators of rice (Oryza sativa) reproductive development. MADS29 is preferentially expresse…	Aegilops tauschii	XLOC_095694	TCONS_00159364	8.95287	0.00803954	24Fe/UT
6HS	MLOC_65966	MADS-box transcription factor 29; MIKC-type MADS involved in seed development. Symplastic continuity, including the ovular vascular trace and the nucellar projection, which is the nutrient source for the filial tissue at early development stages is regulate by MADS29 (PLoS One 2012, 7:e51435). The MADS box transcription factors are critical regulators of rice (Oryza sativa) reproductive developme…	Aegilops tauschii	XLOC_095694	TCONS_00159368	-9.55449	0.00499293	24Fe/UT
6HS	MLOC_22348	Uncharacterized		XLOC_095819	TCONS_00159667	-9.34769	0.00579475	24Fe/UT
6HS	XLOC_095847	Uncharacterized		XLOC_095847	TCONS_00159737	9.57226	0.00496106	24Fe/UT
6HS	XLOC_096020	25S ribosomal RNA; component of the large (60S) ribosomal subunit		XLOC_096020	TCONS_00160005	-2.98653	9.91e-07	24Fe/UT
chr7	XLOC_099518	Chromatin structure-remodeling complex subunit snf21, Transcription activator BRG1; helicase. Component of the chromatin structure remodeling complex (RSC), which is involved in transcription regulation and nucleosome positioning. Controls particularly membrane and organelle development genes in Schizosaccharomyces pombe.	Aegilops tauschii	XLOC_099518	TCONS_00164899	11.0867	0.00188645	24Fe/UT
chr7	MLOC_19210	Fructose-bisphosphate aldolase, FBP aldolase; binds 2 zinc ions per subunit and catalyzes the aldol condensation of dihydroxyacetone phosphate (DHAP or glycerone-phosphate) with glyceraldehyde 3-phosphate (G3P) to form fructose 1,6-bisphosphate (FBP) in gluconeogenesis (the reverse reactions of glycolysis). It results in the generation of glucose from non-carbohydrate carbon substrates such as py…	Aegilops tauschii	XLOC_099545	TCONS_00165044	9.03636	0.00736735	24Fe/UT
chr7	MLOC_80839	Putative DNA repair protein RAD23; involved in nucleotide excision repair (see Plant J 1998, 13: 815-821). Binds and presumably selects ubiquitin-conjugates for destruction. Prefers multiubiquitin chains rather than single ubiquitins, with a binding affinity for 'Lys-48'-linked ubiquitin chains. Acts as an ubiquitin receptor that associates with the 26S proteasomal docking subunit RPN10 for the i…	Aegilops tauschii	XLOC_099580	TCONS_00165173	8.7075	0.00895865	24Fe/UT
chr7	MLOC_80839	Putative DNA repair protein RAD23; involved in nucleotide excision repair (see Plant J 1998, 13: 815-821). Binds and presumably selects ubiquitin-conjugates for destruction. Prefers multiubiquitin chains rather than single ubiquitins, with a binding affinity for 'Lys-48'-linked ubiquitin chains. Acts as an ubiquitin receptor that associates with the 26S proteasomal docking subunit RPN10 for the i…	Aegilops tauschii	XLOC_099580	TCONS_00165175	-10.831	0.00200764	24Fe/UT
chr7	MLOC_67834	Transcription factor bHLH130-like, Transcription factor EN 69, (see Mol Biol Evol 2003, 20:735-47; Plant Cell 2003, 15:1749-1770).	Brachypodium distachyon	XLOC_099652	TCONS_00165500	8.62898	0.00955189	24Fe/UT
chr7	MLOC_14115	Putative glycerol-3-phosphate transporter 1, Protein PHOSPHATE STARVATION-INDUCED GENE 3, G-3-P permease 1, Sugar phosphate exchanger 2; induced by inorganic phosphate (Pi) starvation (see Proc Natl Acad Sci U S A 2005, 102:7760-5; Plant Physiol 2011, 157:279-91. ). This isoform does not have the first 126 amino acids at N-terminal region; this region is likely involved in peroxysomal localizatio…	Triticum urartu, Aegilops tauschii	XLOC_099829	TCONS_00166082	-7.09844	0.00646873	24Fe/UT
chr7	CCA1, MLOC_14118	DNA binding, circadian clock associated 1 that can promote early flowering		XLOC_099865	TCONS_00166185	-9.6903	0.00439991	24Fe/UT
chr7	CCA1, MLOC_14118	DNA binding, circadian clock associated 1 that can promote early flowering		XLOC_099865	TCONS_00166188	10.6661	0.00212696	24Fe/UT
chr7	CCA1, MLOC_14118	DNA binding, circadian clock associated 1 that can promote early flowering		XLOC_099865	TCONS_00166190	-10.3562	0.00222212	24Fe/UT
chr7	MLOC_2575	Putative phagocytic receptor 1b (phg1b); phagocytosis of apoptotic cells is an indispensable part of the cell death program (PLoS Genet, 9: e1003517). Clathrin and the multi-subunit adaptor protein complex AP2 are central players in clathrin-mediated endocytosis by which the cell selectively internalizes surface materials. Here, we report the essential role of clathrin and AP2 in phagocytosis of …	Aegilops tauschii	XLOC_099905	TCONS_00166317	9.82797	0.00376777	24Fe/UT
chr7	MLOC_17055	Beta-galactosidase 9; hydrolysis of terminal non-reducing beta-D-galactose residues in beta-D-galactosides	Aegilops tauschii	XLOC_100019	TCONS_00166779	9.5152	0.00519625	24Fe/UT
chr7	MLOC_74261	Aminolevulinic acid dehydratase; Lead is a potent inhibitor of δ-aminolevulinic acid dehydratase (ALAD), copropor-phyrinogen oxidase, and ferrochelatase, enzymes that catalyze the second, sixth, and final steps, respectively, in the biosynthesis of heme. ALAD, an octameric zinc-containing enzyme, catalyzes the condensation of two molecules of 5-aminolevulinic acid (ALA) into one molecule of monop…	Aegilops tauschii	XLOC_100179	TCONS_00167354	8.74521	0.00988683	24Fe/UT
chr7	MLOC_34521	G-type lectin S-receptor-like serine/threonine-protein kinase At2g19130-like; GsSRK was identified as an alkaline (NaHCO3)-responsive gene, and was subsequently isolated from Glycine soja. induced by ABA, salt, and drought stresses. Over expression of GsSRK in Arabidopsis promoted seed germination, as well as primary root and rosette leaf growth during the early stages of salt stress. Compared to…	Brachypodium distachyon	XLOC_100219	TCONS_00167525	8.69471	0.00895079	24Fe/UT
chr7	XLOC_100244	Putitive miRNA; predicted by findMiRNA programm at http://linux1.softberry.com/berry.phtml?topic=findmirna&group=programs&subgroup=rnastruct dir p-mi_b p-mi_e mi_beg mi_end pre-miRNA miRNA [they show similarity to Arabidopsis thaliana miR169f and Linum usitatissimum miR169b]. Nuclear factor Y (NF-Y) is a ubiquitous transcription factor composed of three distinct subunits (NF-YA, NF-YB, and NF-YC)…		XLOC_100244	TCONS_00167642	8.82956	0.00918833	24Fe/UT
chr7	XLOC_100399	Uncharacterized		XLOC_100399	TCONS_00168208	-8.10222	0.00454705	24Fe/UT
chr7	MLOC_58597	Epidermal growth factor receptor substrate 15-like 1-like isoform X1; seems to be a constitutive component of clathrin-coated pits that is required for receptor-mediated endocytosis. Involved in endocytosis of integrin beta-1 (ITGB1) and transferrin receptor (TFR); internalization of ITGB1 as DAB2-dependent cargo but not TFR seems to require association with DAB2 (see Cancer Res 1997, 57:5498-550…	Setaria italica	XLOC_100549	TCONS_00168700	-6.39833	0.00607381	24Fe/UT
chr7	MLOC_73646	Vacuolar protein sorting-associated protein VTA1 homolog; in yeast, has a role in the formation of the multivesicular body (MVB). Required for the sorting of lipids to form intralumenal vesicles and for fluid-phase transport to the vacuole. Required for sorting the plasma membrane proteins STE2 and STE3 into the MVB. Acts a cofactor of VSP4, promotes the oligomerization of VPS4 and stimulates its…	Setaria italica	XLOC_101230	TCONS_00171185	6.36232	0.00794831	24Fe/UT
chr7	MLOC_73646	Vacuolar protein sorting-associated protein VTA1 homolog; in yeast, has a role in the formation of the multivesicular body (MVB). Required for the sorting of lipids to form intralumenal vesicles and for fluid-phase transport to the vacuole. Required for sorting the plasma membrane proteins STE2 and STE3 into the MVB. Acts a cofactor of VSP4, promotes the oligomerization of VPS4 and stimulates its…	Setaria italica	XLOC_101230	TCONS_00171189	-9.43218	0.00535246	24Fe/UT
chr7	MLOC_56472	AGAMOUS LIKE9-like protein		XLOC_101266	TCONS_00171363	9.39381	0.00555019	24Fe/UT
chr7	MLOC_5322	Putative phosphatidylinositol/phosphatidylcholine transfer protein; a member of alpha-tocopherol transport family proteins, alpha-tocopherol is a major lipid-soluble anti-oxidant. Involved in alpha-tocopherol secretion (see Genes Cells. 2003 Oct;8(10):789-800).	Oryza sativa	XLOC_101275	TCONS_00171386	-8.71471	0.00939532	24Fe/UT
chr7	XLOC_101372	Uncharacterized		XLOC_101372	TCONS_00171784	10.6595	0.00212696	24Fe/UT
chr7	MLOC_75016	Cell division cycle and apoptosis regulator protein 1 (CARP-1); in mouse it associates with components of the Mediator and p160 coactivator complexes that play a role as intermediaries transducing regulatory signals from upstream transcriptional activator proteins to basal transcription machinery at the core promoter. Recruited to endogenous nuclear receptor target genes in response to the approp…	Triticum urartu	XLOC_101678	TCONS_00172865	9.32906	0.00579475	24Fe/UT
chr7	MLOC_75016	Cell division cycle and apoptosis regulator protein 1 (CARP-1); in mouse it associates with components of the Mediator and p160 coactivator complexes that play a role as intermediaries transducing regulatory signals from upstream transcriptional activator proteins to basal transcription machinery at the core promoter. Recruited to endogenous nuclear receptor target genes in response to the approp…	Triticum urartu	XLOC_101678	TCONS_00172869	9.16251	0.00665278	24Fe/UT
chr7	MLOC_32341	Poly(A) polymerase; polymerase that creates the 3'-poly(A) tail of mRNA's. May acquire specificity through interaction with a cleavage and polyadenylation factor. Binds 2 magnesium ions. Also active with manganese.	Aegilops tauschii	XLOC_101679	TCONS_00172878	10.0849	0.00288151	24Fe/UT
chr7	MLOC_53035	EREBP-4 like protein, Ethylene-responsive element binding proteins 4 like; Light or gibberellin was required for EREBP-3 and EREBP-4 expression; EREBP-4 expression was constitutive and unaffected by ABA or ethylene during tobacco seed germination. ERE has been found and characterized for class I ß-1,3-glucanases (ßGLU I) promoter and EREBP-3 regulates its expression (Plant Molecular Biology 1998,…	Zea mays	XLOC_101686	TCONS_00172892	-8.82992	0.00918833	24Fe/UT
chr7	MLOC_5394	Pleiotropic drug resistance protein 1, ABCG29: AtABCG29 is a monolignol transporter involved in lignin biosynthesis (Curr Biol. 2012 Jul 10;22(13):1207-12.).	Brachypodium distachyon	XLOC_101698	TCONS_00172929	9.36986	0.00562864	24Fe/UT
chr7	XLOC_101919	Uncharacterized		XLOC_101919	TCONS_00173761	11.5585	0.00139492	24Fe/UT
chr7	MLOC_57585	Allantoate deiminase, AAH (chloroplastic); involved in the catabolism of purine nucleotides. Allantoate amidohydrolases (AAHs) hydrolize the ureide allantoate to ureidoglycolate, CO(2), and two molecules of ammonium. Allantoate degradation is required to recycle purine-ring nitrogen in all plants. Tropical legumes additionally transport fixed nitrogen via allantoin and allantoate into the shoot, …	Aegilops tauschii	XLOC_101947	TCONS_00173856	-9.08316	0.00720421	24Fe/UT
chr7	XLOC_102034	Uncharacterized		XLOC_102034	TCONS_00174143	-9.44127	0.005348	24Fe/UT
chr7	XLOC_102046	Uncharacterized		XLOC_102046	TCONS_00174175	-1.29954	0.00152361	24Fe/UT
chr7	MLOC_6480	Pyrophosphate-energized vacuolar membrane proton pump-like, Vacuolar proton-inorganic pyrophosphatase (H+-translocating PPase); inolved in vacuole acidification. A proton pump that co-localizes with the V-ATPase occurs in plants and many protists. Vacuolar H+-ATPases are a specific class of multi-subunit pumps that play an essential role in the generation of proton gradients across eukaryotic end…	Hordeum brevisubulatum	XLOC_102052	TCONS_00174201	-10.361	0.00222212	24Fe/UT
chr7	MLOC_3505	Sucrose-phosphate synthase 1, UDP-glucose-fructose-phosphate glucosyltransferase 1; plays a role in photosynthetic sucrose synthesis by catalyzing the rate-limiting step of sucrose biosynthesis from UDP-glucose and fructose- 6-phosphate. Involved in the regulation of carbon partitioning in the leaves of plants. May regulate the synthesis of sucrose and therefore play a major role as a limiting fa…	Aegilops tauschii	XLOC_102063	TCONS_00174240	10.1797	0.00247335	24Fe/UT
chr7	MLOC_3505	Sucrose-phosphate synthase 1, UDP-glucose-fructose-phosphate glucosyltransferase 1; plays a role in photosynthetic sucrose synthesis by catalyzing the rate-limiting step of sucrose biosynthesis from UDP-glucose and fructose- 6-phosphate. Involved in the regulation of carbon partitioning in the leaves of plants. May regulate the synthesis of sucrose and therefore play a major role as a limiting fa…	Aegilops tauschii	XLOC_102063	TCONS_00174241	11.619	0.00139492	24Fe/UT
chr7	MLOC_3505	Sucrose-phosphate synthase 1, UDP-glucose-fructose-phosphate glucosyltransferase 1; plays a role in photosynthetic sucrose synthesis by catalyzing the rate-limiting step of sucrose biosynthesis from UDP-glucose and fructose- 6-phosphate. Involved in the regulation of carbon partitioning in the leaves of plants. May regulate the synthesis of sucrose and therefore play a major role as a limiting fa…	Aegilops tauschii	XLOC_102063	TCONS_00174246	-9.29852	0.00589247	24Fe/UT
chr7	MLOC_3505	Sucrose-phosphate synthase 1, UDP-glucose-fructose-phosphate glucosyltransferase 1; plays a role in photosynthetic sucrose synthesis by catalyzing the rate-limiting step of sucrose biosynthesis from UDP-glucose and fructose- 6-phosphate. Involved in the regulation of carbon partitioning in the leaves of plants. May regulate the synthesis of sucrose and therefore play a major role as a limiting fa…	Aegilops tauschii	XLOC_102063	TCONS_00174249	-6.23241	0.00918833	24Fe/UT
chr7	MLOC_70462	Lysine-specific demethylase 5B (plu-1), Histone demethylase JARID1B, KDM5B; histone demethylase that demethylates 'Lys-4' of histone H3, thereby playing a central role in histone code. Does not demethylate histone H3 'Lys-9' or H3 'Lys-27'. Demethylates trimethylated, dimethylated and monomethylated H3 'Lys-4'. Acts as a transcriptional corepressor for FOXG1B and PAX9. Favors the proliferation of…	Triticum urartu	XLOC_102158	TCONS_00174521	-8.759	0.00978258	24Fe/UT
7HL	MLOC_50898	Elongation factor 1-gamma 2; modulated by cGMP. In tobacco, nitric oxide (NO) exposure caused a transient increase in cGMP levels. cGMP increases the cytosolic Ca2+. cGMP can repress At3g16340 (PDR1), At2g36380 (PDR6), At1g55720 (CAX6 H+/Ca2+antiporter), At5g17860 (CAX7 calcium-H+ exchanger), At5g17850 (CAX8 calcium-H+ exchanger), At1g54115 (CAX10 calcium-H+ exchanger), At4g30110 (HMA2 cadmium-tr…	Aegilops tauschii	XLOC_108257	TCONS_00181030	-10.3271	0.00224111	24Fe/UT
7HL	MLOC_51413	Putative histone-lysine N-methyltransferase ATXR3, Protein SET DOMAIN GROUP 2; catalyzes "S-adenosyl-L-methionine + L-lysine-[histone] = S-adenosyl-L-homocysteine + N(6)-methyl-L-lysine-[histone]". See Gene 2001, 271:215-21.	Triticum urartu	XLOC_108621	TCONS_00181824	6.22264	0.00625924	24Fe/UT
7HS	MLOC_20668	Mediator of RNA polymerase II transcription subunit 15-like isoform X2	Setaria italica	XLOC_112581	TCONS_00186983	9.23499	0.00630612	24Fe/UT
7HS	MLOC_19793	Intracellular protein transport protein USO1-like; required for protein transport from the ER to the Golgi complex in yeast.	Setaria italica	XLOC_112600	TCONS_00187066	9.2438	0.00624155	24Fe/UT
morex_contig_42365	MLOC_58118	Apocytochrome b (mitochondrion); cytochrome b is the central redox catalytic subunit of the quinol: cytochrome c or plastocyanin oxidoreductases. It is involved in the binding of the quinone substrate and it is responsible for the transmembrane electron transfer by which redox energy is converted into a protonmotive force.	Lolium perenne	XLOC_128059	TCONS_00204919	-1.8387	0.000382761	24Fe/UT
morex_contig_48990	MLOC_64555	Putative cellulose synthase A catalytic subunit 1(UDP-forming), CESA1; involved in cell wall biogenesis/degradation, hyperosmotic salinity response, and cellulose biosynthetic process.	Aegilops tauschii	XLOC_128313	TCONS_00205282	-10.607	0.0021744	24Fe/UT
morex_contig_51313	MLOC_66265	U-box domain-containing protein 4 (PUB4), Armadillo homolog, β-catenin; functions as an E3 ubiquitin ligase (Plant Physiol 2004, 134:59-66). Ubiquitination plays important roles in plant growth and development. Whereas ubiquitin-dependent protein degradation and modulation in the cytoplasm and nucleus are well established in plants, ubiquitination events mediated by E3 ubiquitin ligases at the pl…	Triticum urartu	XLOC_128354	TCONS_00205347	-7.46812	0.00761339	24Fe/UT
chr1	MLOC_64273	Gamma 1 hordein; with alpha-amylase binding inhibitor sites. A role for gamma 3 hordein in the transport and targeting of prolamin polypeptides to the vacuole of developing barley endosperm (Plant J 1993, 4:841-53; The Plant Cell 2011, 23:2 769-784).		XLOC_000021		3.93993	1.89e-08	24Fe/UT
chr1	XLOC_000024	B hordein		XLOC_000024		4.46278	1.38e-15	24Fe/UT
chr1	MLOC_46003	B1-hordein; sulfur-rich seed storage protein		XLOC_000025		4.66947	6.76e-17	24Fe/UT
chr1	MLOC_32920	40S ribosomal protein S4-like	Brachypodium distachyon	XLOC_000346		-1.68108	0.00638614	24Fe/UT
chr1	MLOC_47595	Poly(A) polymerase cid, putative	Ricinus communis	XLOC_000430		2.43468	0.00301127	24Fe/UT
chr1	MLOC_2856	Leucine-rich repeat extensin-like protein 4 (LRX4); modulates cell morphogenesis by regulating cell wall formation and assembly, and/or growth polarization. LRX1 is an extracellular component of a mechanism regulating root hair morphogenesis and elongation by controlling either polarized growth or cell wall formation and assembly (see Genes Dev 2001, 15:1128-1139).	Triticum urartu	XLOC_000778		-1.8572	0.00324429	24Fe/UT
chr1	MLOC_43759	Putative protease inhibitor		XLOC_000830		8.41679	8.43e-11	24Fe/UT
chr1	MLOC_66337	Tubulin beta-5 chain; Tubulin is the major constituent of microtubules.		XLOC_000913		-2.25509	0.000666073	24Fe/UT
chr1	MLOC_57911	Receptor-like protein kinase HERK 1; receptor-like protein kinase required for cell elongation during vegetative growth, mostly in a brassinosteroid-(BR-) independent manner (Proc Natl Acad Sci USA 2009 106:7648-7653).	Triticum urartu	XLOC_000939		-1.95603	0.00129195	24Fe/UT
chr1	MLOC_68785	Tubby-like F-box protein 8-like; AtTLP1, 2, 3, 6, 7, 9, 10, and 11 are expressed ubiquitously in all the organs tested, but the expression of AtTLP5 and 8 shows dramatic organ specificity. Three positively charged amino acid residues, R332, R363, and K330, are thought to be crucial for phosphatidylinositol 4,5-bisphosphate [PI (4,5) P2] binding in the tubby domain of mouse TUBBY protein. Except f…	Brachypodium distachyon	XLOC_001059		-2.35756	0.00081631	24Fe/UT
chr1	MLOC_18231	Phosphoribosylanthranilate transferase; involved in aromatic amino acid biosynthesis (J Bacteriol 1974, 117: 502-508; Plant Physiol 1992, 100:582-592).	Zea mays	XLOC_001062		-1.67948	0.00645513	24Fe/UT
chr1	MLOC_4128	3-deoxy-manno-octulosonate cytidylyltransferase-like; in plant cells, boron (B) occurs predominantly as a borate ester associated with rhamnogalacturonan II (RG-II), but the function of this B-RG-II complex has yet to be investigated. 3-Deoxy-D-manno-2-octulosonic acid (KDO) is a specific component monosaccharide of RG-II. Mutant plants defective in KDO biosynthesis are expected to have altered R…	Brachypodium distachyon	XLOC_001277		2.33482	0.00369724	24Fe/UT
chr1	MLOC_44740	Beta-hordothionin; thionins are small secreted plant proteins which are toxic to animal cells. They seem to exert their toxic effect at the level of the cell membrane. Their precise function is not known.		XLOC_001293		3.30667	1.38e-09	24Fe/UT
chr1	MLOC_61554	S-type anion channel SLAH2; slow, weak voltage-dependent S-type anion efflux channel involved in maintenance of anion homeostasis. Involved in efflux of osmoregulatory anions (Cl- and malate(2-)) and stomatal closure (Nature 2008, 452:483-6).	Triticum urartu	XLOC_001361		-4.6965	2.6e-08	24Fe/UT
chr1	XLOC_001439	B1 hordein		XLOC_001439		4.58795	1.38e-15	24Fe/UT
chr1	MLOC_370	Cytochrome c oxidase subunit 1; catalyzes the reduction of oxygen to water. Electrons originating in cytochrome c are transferred via the copper A center of subunit 2 and heme A of subunit 1 to the bimetallic center formed by heme A3 and copper B.	Zea mays	XLOC_001563		-1.02809	0.00924286	24Fe/UT
chr1	MLOC_13782	Protein spinster; a MFS member. Probable sphingolipid transporter that plays a central role in endosomes and/or lysosomes storage.	Aegilops tauschii	XLOC_001738		-3.05493	0.00393589	24Fe/UT
chr1	SSIIIA	Starch synthase IIIa; starch synthases transfer glucose from ADP-glucose to the non-reducing end of pre-existing α-(1–4)-linked glucosyl chains of starch.		XLOC_001843		2.29604	0.00379875	24Fe/UT
chr1	MLOC_61233	Xyloglucan xyloglucosyl transferase; catalyzes the covalent linkages between xyloglucans and cellulosic substrates and between xyloglucans and (1,3;1,4)-beta-D-glucans. Molecular interactions between wall polysaccharides, which include cellulose and a range of noncellulosic polysaccharides such as xyloglucans and (1,3;1,4)-beta-D-glucans, are fundamental to cell wall properties. These interaction…		XLOC_001992		-2.54945	0.00480564	24Fe/UT
chr1	MLOC_13434	Serine/threonine-protein kinase PBS1; protein kinase required for plant defense mechanism mediated by the disease resistance (R) protein RPS5. In case of infection by Pseudomonas syringae, RPS5 specifically recognizes the avrPphB type III effector avirulence protein and triggers a defense reaction. AvrPphB may trigger RPS5-mediated defense mechanism via the cleavage of PBS1. Both kinase activity …	Aegilops tauschii	XLOC_002260		2.55334	0.000883845	24Fe/UT
chr1	MLOC_66415	Phosphoethanolamine N-methyltransferase 1 (NMT1); catalyzes N-methylation of phosphoethanolamine, phosphomonomethylethanolamine and phosphodimethylethanolamine, the three methylation steps required to convert phosphoethanolamine to phosphocholine. It increase the production of choline and glycine betaine (see PNAS 2001, 98:10001-10005).	Aegilops tauschii	XLOC_002481		-2.16693	0.000883845	24Fe/UT
chr1	MLOC_22225	Alpha-hordothionin; thionins are small plant proteins which are toxic to animal cells. They seem to exert their toxic effect at the level of the cell membrane. Their precise function is not known (Eur J Biochem 1986 156:131-5; Biotechnol Lett 2013, 35:1085-91.).		XLOC_002659		2.79857	1.29e-07	24Fe/UT
chr1	XLOC_002772	Fatty acyl-CoA reductase 1, FAR1; involved in response to salt stress, response to wounding, suberin biosynthetic process. Catalyzes the reduction of fatty acyl-CoA to fatty alcohols. Very long chain primary alcohols are significant components in cuticle waxes of plants. Fatty acyl-CoA reductases (FARs) catalyze the formation of a fatty alcohol from an acyl-CoA (J Plant Physiol 2009, 166:787-96).	Aegilops tauschii	XLOC_002772		7.89507	1.68e-08	24Fe/UT
chr1	XLOC_002810	Gamma 3 hordein; has a role in the transport and targeting of prolamins to the vacuole of developing barley endosperm.		XLOC_002810		3.42177	5.05e-07	24Fe/UT
chr1	XLOC_006384	Partialy similar to floricaula/leafy (FL) gene, intron 2; from nucleotide 237 to 290 has similarity. This region is also similar to Triticum aestivum miR1122 and can make hairpin. dir p-mi_b p-mi_e mi_beg mi_end pre-miRNA miRNA + 172 291 231 251 gccgggcucgagcuugggauuuucaauucgggcuuucucaagccuggcccagggcaugcccagguuuaguccauagugaaaucucuaaaaaggcuuauauuuaggaacagaggaaguaac ccagguuuaguccauagugaa LEAFY inte…	Avena sativa	XLOC_006384		-3.76468	3.34e-09	24Fe/UT
chr1	XLOC_006826	Retrotransposon, athilaSabrina		XLOC_006826		4.20475	4.15e-05	24Fe/UT
1H	XLOC_007433	Core-2/I-branching beta-1,6-N-acetylglucosaminyltransferase family protein; this is a family of two different beta-1,6-N-acetylglucosaminyltransferase enzymes, I-branching enzyme and core-2 branching enzyme . I-branching enzyme is responsible for the production of the blood group I-antigen during embryonic development. Core-2 branching enzyme forms crucial side-chain branches in O-glycans. Glycos…	Theobroma cacao	XLOC_007433		3.39599	0.000666073	24Fe/UT
1H	XLOC_007461	D hordein; hordein, as the main storage protein fraction in barley seeds, accounts for up to half of the total protein in the mature grains, and may be classified into four groups named B, C, D and γ hordeins based on their electrophoretic mobilities (Shewry et al., 1985). The B and C fractions account for 70%~80% and 10%~12%, respectively, of the total hordein, while the D and γ fractions are mi…		XLOC_007461		1.9031	0.00165259	24Fe/UT
1H	XLOC_007484	Peptide transporter PTR2, NTR1, PTR2-B, ARABIDOPSIS THALIANA PEPTIDE TRANSPORTER 2, ATPTR2, ATPTR2-B, NITRATE TRANSPORTER 1, NTR1, PEPTIDE TRANSPORTER 2, PTR2, PTR2-B; Peptide transporter. Mediates the transport of di- and tripeptides. High affinity, low capacity transporter. Can also transport histidine. Members of the peptide transporter/nitrate transporter 1 (PTR/NRT1) family in plants transpo…	Aegilops tauschii	XLOC_007484		-2.14328	0.00717148	24Fe/UT
1H	XLOC_007814	Putative glycosyl hydrolase; in Mycobacterium tuberculosis (glycosyl hydrolase Rv2006/MT2062), it is a member of the dormancy regulon. Induced in response to reduced oxygen tension (hypoxia), low levels of nitric oxide (NO) and carbon monoxide (CO). It is hoped that this regulon will give insight into the latent, or dormant phase of infection( see J Exp Med 2003, 198:705-13; Cell Host Microbe 200…	Aegilops tauschii	XLOC_007814		-2.7709	4.51e-05	24Fe/UT
1H	XLOC_007904	Malate dehydrogenase, cytosolic; malate dehydrogenase is an enzyme that reversibly catalyzes the oxidation of malate to oxaloacetate using the reduction of NAD+ to NADH. This reaction is part of many metabolic pathways, including the citric acid cycle. Other malate dehydrogenases, which have other EC numbers and catalyze other reactions oxidizing malate, have qualified names like malate dehydroge…	Triticum aestivum	XLOC_007904		-1.96409	0.00456243	24Fe/UT
1H	MLOC_47248	Aspartic proteinase nepenthesin-1-like; Extracellular proteinase found in the pitcher fluid of carnivorous plants. Digest prey for nitrogen uptake.	Aegilops tauschii	XLOC_007974		-2.65387	0.000183094	24Fe/UT
1H	XLOC_008108	C-hordein		XLOC_008108		4.4822	0.000578515	24Fe/UT
1H	MLOC_38045	PP2C, Putative protein phosphatase 2C 47; binds 2 magnesium or manganese ions per subunit and catalyzes "a phosphoprotein + H2O = a protein + phosphate". The protein phosphatase 2Cs (PP2Cs) from various organisms have been implicated to act as negative modulators of protein kinase pathways involved in diverse environmental stress responses and developmental processes. While protein phosphatases 2…	Aegilops tauschii	XLOC_008262		-2.00054	0.00377855	24Fe/UT
1H	MLOC_37688	LRR receptor-like serine/threonine-protein kinase GSO1, Protein GASSHO 1; together with GSO2, receptor-like serine/threonine-kinase required during the development of the epidermal surface in embryos and cotyledons (Plant J 2008, 54:30-42).	Aegilops tauschii	XLOC_008561		-2.57368	1.72e-05	24Fe/UT
1H	XLOC_008797	Gamma-1 hordein		XLOC_008797		4.97056	1.82e-05	24Fe/UT
1H	XLOC_008894	B hordein		XLOC_008894		3.08984	0.00155058	24Fe/UT
1H	XLOC_008956	Cytosolic malate dehydrogenase; malate dehydrogenase is an enzyme that reversibly catalyzes the oxidation of malate to oxaloacetate using the reduction of NAD+ to NADH. This reaction is part of many metabolic pathways, including the citric acid cycle. Other malate dehydrogenases, which have other EC numbers and catalyze other reactions oxidizing malate, have qualified names like malate dehydrogen…	Triticum aestivum	XLOC_008956		-1.83351	0.00996752	24Fe/UT
1H	XLOC_009088	Uncharacterized		XLOC_009088		-3.68088	2.06e-12	24Fe/UT
1H	XLOC_009824	Myb transcription factor RAX2, ATMYB38, BIT1, BLUE INSENSITIVE TRAIT 1, MYB DOMAIN PROTEIN 38, MYB38, RAX2, REGULATOR OF AXILLARY MERISTEMS 2; involved in blue light signaling pathway, regulation of transcription, DNA-dependent, response to abscisic acid stimulus, response to gibberellin stimulus, response to jasmonic acid stimulus, response to salicylic acid stimulus. CRY1 inhibits COP1-mediated…	Cicer arietinum, Arabidopsis thaliana	XLOC_009824		-3.39366	0.000423051	24Fe/UT
1H	XLOC_011276	B3-hordein		XLOC_011276		4.00294	5.64e-11	24Fe/UT
1H	XLOC_012316	Uncharacterized		XLOC_012316		-2.48189	2.91e-05	24Fe/UT
1H	XLOC_013149	C-hordein		XLOC_013149		4.69002	0.000133771	24Fe/UT
1H	XLOC_013250	C-hordein		XLOC_013250		4.63944	8.43e-11	24Fe/UT
1H	XLOC_013527	B1 hordein		XLOC_013527		3.78512	0.000251929	24Fe/UT
1H	XLOC_013631	Gamma-1 hordein		XLOC_013631		4.01431	3.49e-05	24Fe/UT
1H	XLOC_014059	Uncharacterized		XLOC_014059		-2.97219	0.00245518	24Fe/UT
1H	XLOC_014848	B3 hordein		XLOC_014848		3.47988	1.64e-07	24Fe/UT
1H	XLOC_014857	Uncharacterized		XLOC_014857		-2.60506	0.00238878	24Fe/UT
1H	XLOC_014997	B3-hordein		XLOC_014997		3.69675	2.79e-07	24Fe/UT
1H	XLOC_015060	Uncharacterized		XLOC_015060		-2.84379	0.00606377	24Fe/UT
1H	XLOC_015155	B3-hordein		XLOC_015155		3.41235	5.42e-10	24Fe/UT
1H	XLOC_015307	B3-hordein		XLOC_015307		3.73162	8.56e-10	24Fe/UT
1H	XLOC_015319	Uncharacterized		XLOC_015319		-2.72242	0.000299911	24Fe/UT
1H	XLOC_015326	Uncharacterized		XLOC_015326		-2.65795	0.000124111	24Fe/UT
1H	XLOC_015711	B3-hordein		XLOC_015711		3.4563	2.84e-05	24Fe/UT
chr2	XLOC_016167	Mitochondrial large subunit ribosomal RNA	Sorghum bicolor , Spathiphyllum wallisii	XLOC_016167		-1.72303	0.00242884	24Fe/UT
chr2	MLOC_56064	LRR receptor-like serine/threonine-protein kinase At1g74360-like; likely involved in MAPK cascade, cellular membrane fusion, defense response by callose deposition, defense response to bacterium, defense response to fungus, detection of biotic stimulus, detection of external stimulus, endoplasmic reticulum unfolded protein response, jasmonic acid mediated signaling pathway, negative regulation of…	Setaria italica	XLOC_016561		-2.48564	0.00694054	24Fe/UT
chr2	XLOC_016579	Uncharacterized		XLOC_016579		-3.20426	0.000235039	24Fe/UT
chr2	MLOC_10214	Transcription factor PCF6-like; transcription activator. Binds the promoter core sequence 5'-GGNCC-3'. The seven PCF members including five newly isolated proteins, were able to be grouped into two classes, I and II, based on sequence similarity in the TCP domain. Random binding site selection experiments and electrophoretic mobility shift assays (EMSAs) revealed the consensus DNA binding sequenc…	Brachypodium distachyon	XLOC_016950		-1.92979	0.00638614	24Fe/UT
chr2	MLOC_50914	Vacuolar amino acid transporter 1-like, AVT1; required for the vacuolar uptake and storage of large neutral amino acids including tyrosine, glutamine, asparagine, isoleucine and leucine. Requires ATP for function (J Biol Chem 2001, 276:23849-23857; J Biol Chem 2005, 280:4851-4857).	Setaria italica	XLOC_016957		-1.59375	0.00929093	24Fe/UT
chr2	MLOC_8032	PIP aquaporin; major intrinsic protein (MIP) superfamily. Members of the MIP superfamily function as membrane channels that selectively transport water, small neutral molecules, and ions out of and between cells.		XLOC_017204		-3.76172	0.00393589	24Fe/UT
chr2	MLOC_76462	E3 ubiquitin-protein ligase RMA1H1-like; bacterially expressed Rma1H1 displayed E3 Ub ligase activity in vitro. Rma1H1 was rapidly induced by various abiotic stresses, including dehydration, and its overexpression in transgenic Arabidopsis thaliana plants conferred strongly enhanced tolerance to drought stress. Colocalization experiments with marker proteins revealed that Rma1H1 resides in the en…	Brachypodium distachyon	XLOC_017239		-1.87326	0.00801106	24Fe/UT
chr2	MLOC_72117	Scarecrow-like protein 8; putative transcription factor and likely downregulated by miRNA39 (miR171)[see Science 2002, 297 (5589): 2053-2056 ]. May Encodes a Transcriptional Regulator Repressing the Gibberellin Signal Transduction Pathway (The Plant Cell 1998, 10:155-169). May positively involved in Light signaling via the phytochrome A (phyA) photoreceptor (Genes & Dev 2000, 14:1269-1278).	Brachypodium distachyon	XLOC_017295		-2.42756	0.000384285	24Fe/UT
chr2	MLOC_64248	Naringenin,2-oxoglutarate 3-dioxygenase, Flavanone-3-hydroxylase (FLS1), This enzyme participates in flavonoid biosynthesis. It has 2 cofactors: iron, and Ascorbate.		XLOC_017604		-1.60239	0.00932128	24Fe/UT
chr2	XLOC_017615	Uncharacterized		XLOC_017615		2.10829	0.00695658	24Fe/UT
chr2	MLOC_51932	Auxin response factor 12-like; with a N-terminal DNA binding domains of BfiI, EcoRII and plant B3 which is a type IIE restriction endonuclease EcoRII-like proteins. B3 proteins are a family of plant-specific transcription factors, involved in a great variety of processes, including seed development and auxin response.	Triticum urartu, Brachypodium distachyon	XLOC_017817		-1.87103	0.00397706	24Fe/UT
chr2	XLOC_017991	Mitochondrial large subunit ribosomal RNA	Orontium aquaticum	XLOC_017991		-1.72682	0.00241237	24Fe/UT
chr2	XLOC_018523	Uncharacterized		XLOC_018523		2.68831	0.00198118	24Fe/UT
chr2	MLOC_65593	Uncharacterized protein		XLOC_018663		-1.80891	0.00531243	24Fe/UT
chr2	MLOC_66590	Glutamate receptor 3.4-like (GLR3.4); Glutamate-gated receptor that probably acts as non-selective cation channel, at least in hypocotyls. Can be triggered by Ala, Asn, Gly, Ser and, to a lower extent, Cys and Glu. May be involved in light-signal transduction and calcium homeostasis via the regulation of calcium influx into cells. Plays an important role in the calcium-based fast transmission of …	Brachypodium distachyon	XLOC_018743		-2.09537	0.00950896	24Fe/UT
chr2	MLOC_9203	Cell division protein ftsZ-like protein 2-1, chloroplastic; exhibits GTPase activity. FtsZ is a cytoskeletal GTPase, forms a contractile ring for cell division in bacteria and chloroplast division in plants. Component of the plastid division machinery that forms a contractile ring at the division site. Required for plastid division in a dose-dependent manner (Mol Plant 2009, 2:1211-1222; FEBS Let…	Triticum urartu	XLOC_018761		2.42709	0.00645513	24Fe/UT
chr2	MLOC_77243	Glucan endo-1,3-beta-glucosidase 14; involved in cell wall biogenesis/degradation and plant defense mechanisms (see Mol Cell Proteomics 2003, 2:1261-70). At: At2g27500	Aegilops tauschii	XLOC_018787		-2.52545	2.36e-05	24Fe/UT
chr2	MLOC_56806	Uncharacterized		XLOC_019333		-2.80326	0.00237662	24Fe/UT
chr2	XLOC_019431	Uncharacterized		XLOC_019431		2.27594	0.00354391	24Fe/UT
chr2	MLOC_74116	Chalcone synthase 1; Chalcone synthase (CHS, EC 2.3.1.74) is a key enzyme of the flavonoid/isoflavonoid biosynthesis pathway. Besides being part of the plant developmental program the CHS gene expression is induced in plants under stress conditions such as UV light, bacterial or fungal infection. CHS expression causes accumulation of flavonoid and isoflavonoid phytoalexins and is involved in the …	Aegilops tauschii	XLOC_019507		-1.61193	0.00761391	24Fe/UT
chr2	XLOC_019772	Uncharacterized		XLOC_019772		7.421	1.57e-06	24Fe/UT
chr2	XLOC_020395	Uncharacterized		XLOC_020395		3.75206	0.000997394	24Fe/UT
chr2	XLOC_023282	Uncharacterized		XLOC_023282		5.33476	8.28e-07	24Fe/UT
chr2	XLOC_023285	Retrotransposon:RLG_BAGY2-2		XLOC_023285		3.94333	0.000338843	24Fe/UT
chr2	XLOC_023962	Uncharacterized		XLOC_023962		4.17455	5.36e-05	24Fe/UT
chr2	XLOC_024104	Uncharacterized		XLOC_024104		4.43678	0.000780185	24Fe/UT
chr2	XLOC_024249	Uncharacterized		XLOC_024249		4.97056	1.82e-05	24Fe/UT
chr2	XLOC_024735	Retrotransposon, gypsy, LTR, Sukkula_AY661558-7		XLOC_024735		4.34143	0.00145084	24Fe/UT
2HL	MLOC_67489	L-allo-threonine aldolase; catalyzes L-allo-threonine = glycine + acetaldehyde (FEMS Microbiol Lett. 1997 Jun 15;151(2):245-8.). Glycine is not only an important cellular component but is also a precursor of cellular C, source. The glycine-forming pathway in Escherichia coli has been extensively studied, and serine hydroxymethyltransferase-catalyzed formation of glycine from serine has been concl…	Triticum urartu	XLOC_025685		2.53738	0.00833988	24Fe/UT
2HL	MLOC_1565	Alpha-amylase inhibitor BMAI-1 (Alpha-amylase flour inhibitor);		XLOC_025843		3.22009	0.00197136	24Fe/UT
2HL	MLOC_43497	ATFP3 (HMA superfamily), Farnesylated protein 3 (FP3); localized to cell wall/cytosol predicted by PlantLoc server.	Zea mays	XLOC_026442		2.33607	0.00264892	24Fe/UT
2HL	MLOC_81408	E3 ubiquitin-protein ligase RNF14, encodes a protein whose sequence is similar to tobacco hairpin-induced gene (HIN1) and Arabidopsis non-race specific disease resistance gene (NDR1). In human might act as an E3 ubiquitin-protein ligase which accepts ubiquitin from specific E2 ubiquitin-conjugating enzymes and then transfers it to substrates, which could be nuclear proteins.	Brachypodium distachyon	XLOC_026607		-2.51357	0.00796247	24Fe/UT
2HL	XLOC_026648	Similar to vacuolar processing enzyme 2b (vpe2b gene); involved in proteolysis.		XLOC_026648		-1.8363	0.00160479	24Fe/UT
2HL	XLOC_027616	Mitochondrial large subunit ribosomal RNA	Citrus maxima	XLOC_027616		-1.9455	0.000799381	24Fe/UT
2HL	XLOC_028622	Uncharacterized		XLOC_028622		-2.14658	0.00431313	24Fe/UT
2HL	XLOC_029614	Uncharacterized		XLOC_029614		3.47877	0.00198118	24Fe/UT
2HS	MLOC_4958	Subtilisin-like protease, Cucumisin-like serine protease, ARA12; activated by calcium. A serine protease with a substrate preference for the hydrophobic residues Phe and Ala and the basic residue Asp in the P1 position, and for Asp, Leu or Ala in the P1' position (J Biol Chem 1997, 272:15841-15848; Biochem J 2003, 370:57-67).	Aegilops tauschii	XLOC_030421		-2.5877	0.00732644	24Fe/UT
2HS	XLOC_030479	Serine/threonine-protein kinase fray2	Triticum urartu	XLOC_030479		3.50238	0.000287019	24Fe/UT
2HS	MLOC_61111	Zinc finger CCCH domain-containing protein 50-like; it has ankyrin repeats that mediate protein-protein interactions.	Brachypodium distachyon	XLOC_030896		-1.80161	0.00798173	24Fe/UT
2HS	XLOC_031737	Mitochondrial small subunit ribosomal RNA	Croomia pauciflora	XLOC_031737		-1.17543	0.00982967	24Fe/UT
2HS	XLOC_032316	Disease resistance protein RPM1, Resistance to Pseudomonas syringae protein 3; disease resistance (R) protein that specifically recognizes the AvrRpm1 type III effector avirulence protein from Pseudomonas syringae. Resistance proteins guard the plant against pathogens that contain an appropriate avirulence protein via an indirect interaction with this avirulence protein. That triggers a defense s…	Aegilops tauschii	XLOC_032316		2.01343	0.00397706	24Fe/UT
2HS	XLOC_033062	Uncharacterized		XLOC_033062		3.1989	1.04e-05	24Fe/UT
chr3	MLOC_62487	PDR6, Pleiotropic drug resistance protein 6-like; likely involved in defence response (Appl Environ Microbiol 2011, 77: 5973-5980; FEBS Lett 2006, 580:1123-30; Chinese Science Bulletin 2009, 54:3249-3257). A member of the PLEIOTROPIC DRUG RESISTANCE family of ATP binding cassette transporters is required for the formation of a functional cuticle and then cell wall in Arabidopsis (The Plant Cell 2…	Brachypodium distachyon	XLOC_034426		2.01233	0.000883845	24Fe/UT
chr3	MLOC_63070	Peptide-N4-(N-acetyl-beta-glucosaminyl) asparagine amidase A; specifically deglycosylates the denatured form of N-linked glycoproteins in the cytoplasm and assists their proteasome-mediated degradation. Deglycosylation is a prerequisite for subsequent proteasome-mediated degradation of some, but not all, misfolded glycoproteins. PNGase interacts with the 19S proteasome (Proc Natl Acad Sci USA 200…	Setaria italica	XLOC_034519		-1.75058	0.00455079	24Fe/UT
chr3	MLOC_66447	Putative pectinesterase 11 (PME11); acts in the modification of cell walls via demethylesterification of cell wall pectin.	Triticum urartu	XLOC_034695		-1.69212	0.00872308	24Fe/UT
chr3	MLOC_65788	Dihydroflavonol-4-reductase; the first enzyme committed to anthocyanin biosynthesis in the flavonoid pathway and catalyzes the NADPH-dependent reduction of dihydroflavonols into leucoanthocyanidins. Anthocyanins, a type of flavonoid, are responsible for most pinks, reds, mauves and blues in flowers and fruits, where they serve as visual signals to recruit pollinators and seed dispersers (see Plan…	Triticum aestivum	XLOC_034815		-2.38615	5.36e-05	24Fe/UT
chr3	MLOC_5176	Putative brassinosteroid-insensitive protein 1, Brassinosteroid LRR receptor kinase ; a receptor with serine/threonine-protein kinase activity. Involved in the perception of systemin, a peptide hormone responsible for the systemic activation of defense genes in leaves of wounded plants.		XLOC_034935		-1.68052	0.00952486	24Fe/UT
chr3	MLOC_56556	Exocyst complex component; plays a critical role in vesicular trafficking and the secretory pathway by targeting post-Golgi vesicles to the plasma membrane. The encoded protein is required for assembly of the exocyst complex and docking of the complex to the plasma membrane (PLoS One 2012, 7:e52627). Plays important roles in plant morphogenesis (The Plant Cell, 2008, 20:1330-1345).	Triticum urartu	XLOC_035068		3.38094	0.00906957	24Fe/UT
chr3	MLOC_64204	Alpha-1,4-glucan-protein synthase (UDP-forming), UDP-glucose:protein transglucosylase, Golgi-associated protein se-wap41; possible role in the synthesis of cell wall polysaccharides.	Aegilops tauschii	XLOC_035073		-3.10188	0.00315659	24Fe/UT
chr3	MLOC_56891	Probable peptide/nitrate transporter At1g22540-like isoform 1, Major facilitator superfamily protein, Oligopeptide transporter	Brachypodium distachyon	XLOC_035238		-2.4481	0.000555335	24Fe/UT
chr3	MLOC_25678, PAP-14	Papain-like cysteine proteinase, Vignain-like; Bean endopeptidase, Cysteine proteinase, Sulfhydryl-endopeptidase; thought to be involved in the hydrolysis of stored seed proteins (see FEBS Lett 1994, 351:31-4).	Setaria italica	XLOC_035361		-2.30139	3.12e-05	24Fe/UT
chr3	MLOC_68101	Glutathione transferase F5; may be involved in the conjugation of reduced glutathione to a wide number of exogenous and endogenous hydrophobic electrophiles and have a detoxification role against certain herbicides. Besides detoxifying electrophilic xenobiotics, such as chemical carcinogens, environmental pollutants, and antitumor agents, these transferases inactivate endogenous alpha,beta-unsatu…	Triticum aestivum	XLOC_035529		3.02456	2.48e-05	24Fe/UT
chr3	MLOC_70041	Uncharacterized		XLOC_035842		7.72871	9.3e-08	24Fe/UT
chr3	XLOC_036126	EIBI1 protein, Probable pleiotropic drug resistance protein 4, ABC transporter G family member 32, PDR4, PEC1, PERMEABLE CUTICLE 1; may be a general defense protein. Repressed by cycloheximide (CHX) and abscisic acid (ABA).,	Setaria italica, Aegilops tauschii	XLOC_036126		1.94671	0.00687174	24Fe/UT
chr3	MLOC_4847	Uncharacterized protein; putative PC-Esterase. Acyl-Esterase family found in Pmr5 and Cas1p. The PC-Esterase family is comprised of Cas1p, the Homo sapiens C7orf58, Arabidopsis thaliana PMR5 and a group of plant freezing resistance/coldacclimatization proteins typified by Arabidopsis thaliana ESKIMO1.		XLOC_036339		-3.39834	1.75e-06	24Fe/UT
chr3	XLOC_036374	Uncharacterized		XLOC_036374		4.97056	1.82e-05	24Fe/UT
chr3	XLOC_036442	18S ribosomal RNA	Secale cereale	XLOC_036442		-1.00648	0.00932709	24Fe/UT
chr3	MLOC_5534	Indole-3-acetic acid-amido synthetase GH3.2-like, Auxin-responsive GH3-like protein 2, BRU6, CF4, YDK1; induced by auxin. Down-regulated by blue and far red lights. Catalyzes the synthesis of indole-3-acetic acid (IAA)-amino acid conjugates, providing a mechanism for the plant to cope with the presence of excess auxin. Strongly reactive with Glu, Gln, Trp, Asp, Ala, Leu, Phe, Gly, Tyr, Met, Ile a…	Brachypodium distachyon	XLOC_036576		-1.84658	0.00370963	24Fe/UT
chr3	MLOC_6252	Glycerol-3-phosphate dehydrogenase (NAD(P)+); it uses glycerol 3-phosphate + NAD(P)+ to produce glycerone phosphate + NAD(P)H + H+. Glycerophospholipids or phosphoglycerides are glycerol-based phospholipids. They are the main component of biological membranes.	Aegilops tauschii	XLOC_036772		2.3711	0.00315659	24Fe/UT
chr3	MLOC_34123	Cytochrome c oxidase subunit 3, Mintochondrial; the terminal enzyme of the respiratory chain that catalyzes the transfer of electrons from reduced cytochrome c to molecular oxygen.	Zea mays	XLOC_036912		-1.06935	0.0095962	24Fe/UT
chr3	MLOC_55542	Serine carboxypeptidase 1 (CBP1); most SCPs have a signal sequence that directs their translocation into the secretory pathway and are believed to be vacuolar, since they are active at acidic pH. However, one Arabidopsis SCP, Brassinosteroid Insensitive1 Suppressor (BRS1), has been shown to be located outside the cell. When overexpressed, BRS1 interferes with the brassinosteroid signaling pathway…		XLOC_037151		-2.4558	4.77e-06	24Fe/UT
chr3	MLOC_10758	HAK5, Potassium transporter 5-like isoform 1; plasma membrane localized. Salt tolerance mechanism mediated by HKT transporters: a mechanism for sodium exclusion and maintenance of high K+/Na+ ratio in leaves during salinity stres (Plant Cell and Environment 2010, 33:552–565; J Biosci Bioeng 2011, 111:346-56; Plant Physiologyr 2002, 130:784-795).	Brachypodium distachyon	XLOC_037152		5.6253	4.62e-08	24Fe/UT
chr3	XLOC_038300	Uncharacterized		XLOC_038300		6.65824	0.000427136	24Fe/UT
chr3	XLOC_039212	Retrotransposon Sukkula_N5D-1		XLOC_039212		4.69002	0.000133771	24Fe/UT
chr3	XLOC_040266	Retrotransposon Sukkula LTR-1		XLOC_040266		6.7102	0.000305686	24Fe/UT
chr3	XLOC_040579	Mitochondrial large subunit ribosomal RNA	Schisandra sphenanthera	XLOC_040579		-1.27279	0.00908194	24Fe/UT
chr3	XLOC_040886	Uncharacterized		XLOC_040886		4.86474	5.42e-07	24Fe/UT
chr3	XLOC_041328	Uncharacterized		XLOC_041328		4.56895	0.000310402	24Fe/UT
chr3	XLOC_041645	Signal recognition particle (SRP) 7S RNA variant 1; the signal recognition particle (SRP) binds to the signal sequence on the surface of a translating ribosome and thus directs the secretory protein to the proper subcellular compartment.	Triticum aestivum	XLOC_041645		-2.65033	0.00379875	24Fe/UT
3HL	MLOC_77779	Zinc transporter 2; mediates zinc uptake. May also transport copper and cadmium ions (see J Biol Chem 2003, 278:47644-53; Proc Natl Acad Sci U S A 1998, 95:7220-4). It has a mitochondrial signal peptide predicted by DTU-CBS server.	Aegilops tauschii	XLOC_042960		-2.35079	0.000268309	24Fe/UT
3HL	MLOC_51178	Hemerythrin-like domain containing protein, LOC_Os01g64250 homologue; hemerythrin (Hr) like domains have the same four alpha helix bundle and a similar, but slightly different active site structure than hemerythrin. They are non-heme diiron binding proteins mainly found in bacteria and eukaryotes. Like Hr, they may be involved in oxygen transport or like human FBXL5 (F-box and leucine-rich repeat…		XLOC_043087		2.63166	5.17e-05	24Fe/UT
3HL	XLOC_043096	Uncharacterized		XLOC_043096		2.3311	3.91e-05	24Fe/UT
3HL	MLOC_74559	wpk4 protein kinase; it is an SNF1-related Wheat Protein Kinase. Nitrate reductase has been shown to be inactivated by phosphorylation upon 14-3-3 binding, the present findings strongly suggest that WPK4 is the protein kinase responsible for controlling the nitrogen metabolic pathway, assembling the nitrate reductase and 14-3-3 complex through its phosphorylation specificity (J Biol Chem 2000, 27…	Triticum aestivum	XLOC_043443		-2.12624	0.00731351	24Fe/UT
3HL	XLOC_043635	Hordeum vulgare miR5049e family MIR5067; predicted targets includes Glutathione S-transferase GST 34 and TSI-1, CONSTANS-like protein CO5, Multidrug resistance protein 1 homolog, SOUL heme-binding protein-like, Phospholipid-hydroperoxide glutathione peroxidase, and Cinnamyl alcohol dehydrogenase (see Int J Mol Sci 2012, 13:2973-2984). Putitive miRNA; predicted by findMiRNA programm at http://linu…		XLOC_043635		5.23216	1.75e-06	24Fe/UT
3HL	XLOC_043785	Splicing factor 3A subunit 3, Spliceosome-associated protein 61	Brachypodium distachyon	XLOC_043785		2.62266	0.00480564	24Fe/UT
3HL	XLOC_044856	Probable indole-3-acetic acid-amido synthetase GH3.2, BRU6, CF4, YDK1; catalyzes the synthesis of indole-3-acetic acid (IAA)-amino acid conjugates, providing a mechanism for the plant to cope with the presence of excess auxin. Strongly reactive with Glu, Gln, Trp, Asp, Ala, Leu, Phe, Gly, Tyr, Met, Ile and Val. Little or no product formation with His, Ser, Thr, Arg, Lys, or Cys. Also active on py…	Setaria italica	XLOC_044856		-2.98299	0.00125847	24Fe/UT
3HL	XLOC_045616	Uncharacterized		XLOC_045616		2.01933	0.00879018	24Fe/UT
3HL	XLOC_046324	Uncharacterized		XLOC_046324		2.67683	0.00397706	24Fe/UT
3HS	MLOC_76653	ATPase subunit 4; codes for the first half of the protein! The transcript does not have any 3UTR!	Triticum aestivum	XLOC_048005		-1.5175	0.00932128	24Fe/UT
3HS	MLOC_15021	PAP-specific phosphatase HAL2-like protein; a Ca2+, Li+, and Na+ sensitive phophatase. Converts adenosine 3'-phosphate 5'-phosphosulfate (PAPS) to adenosine 5'-phosphosulfate (APS) and 3'(2')-phosphoadenosine 5'- phosphate (PAP) to AMP. May regulate the flux of sulfur in the sulfur-activation pathway by converting PAPS to APS. Prevents both the toxicity of PAP on RNA processing enzymes as well as…	Triticum urartu	XLOC_048106		-2.45265	0.00833988	24Fe/UT
3HS	MLOC_63058	Uncharacterized Zinc Finger protein transcription factor; probable transcription factor that regulates tissue boundaries and asymmetric cell division (Genes Dev 2007, 21:2196-2204).	Brachypodium distachyon	XLOC_048291		-1.89129	0.00261463	24Fe/UT
3HS	MLOC_70542	Receptor-like protein kinase HSL1-like; Decreased expression shortly before the onset of abscission (see Plant Cell 2008, 20:1805-17).	Brachypodium distachyon	XLOC_048392		-2.17048	0.00573927	24Fe/UT
3HS	MLOC_16769	Xylosyltransferase-like; AtXXT1 and AtXXT2 encode xylosyltransferases that are required for xyloglucan (a major cell wall component) biosynthesis (The Plant Cell 2008, 20:1519-1537; PNAS 2002, 99: 7797-7802).	Brachypodium distachyon	XLOC_048416		-2.16445	0.00395085	24Fe/UT
3HS	MLOC_15578	Trypsin inhibitor Cme, BTI-CMe3.1 protein; probably plays a protective role through inhibition of insect midgut proteases (Transgenic Res 2003, 12:23-31).		XLOC_048438		2.95315	2.1e-06	24Fe/UT
3HS	MLOC_76271	Transcription factor MYB1R1; binds selectively to the DNA sequence 5'-[GA]GATAA-3' and may act as a transcription factor involved in the regulation of drought-responsive genes. Enhances stomatal closure in response to abscisic acid (ABA). Confers drought and salt tolerance. Up-regulated by drought, high salinity, and ABA (see Plant Physiol 2011,155:421-32).	Triticum urartu	XLOC_048455		2.42709	0.00645513	24Fe/UT
3HS	MLOC_47293	Uncharacterized		XLOC_048653		-2.2846	0.00622667	24Fe/UT
3HS	XLOC_049553	Uncharacterized		XLOC_049553		6.7102	0.000305686	24Fe/UT
3HS	XLOC_050340	Uncharacterized		XLOC_050340		-2.4529	0.00374933	24Fe/UT
chr4	MLOC_77063	Tropomyosin-1, isoforms 33/34-like, SRC2, transcriptional repressor scratch 1-like (SCRT1); a transcriptional repressor that binds E-box motif CAGGTG. Can modulate the action of basic helix-loop-helix (bHLH) transcription factors, critical for neuronal differentiation in human. hScrt shares the capacity of other Snail family members to bind to E-box enhancer motifs, which are targets of basic hel…	Setaria italica, Zea mays	XLOC_051443		-3.30041	0.00030827	24Fe/UT
chr4	MLOC_59382	Uncharacterized membrane protein YMR155W-like; YMR155W identified as interacting with Hsp82p in a high-throughput two-hybrid screen in yeast and has metal (gold nonoparticles) resistance phenotype in yeast YMR155W mutant (see Appl Environ Microbiol 2013, 79:728-33). It also affect vacuole membrane fragmentation (PLoS One 2013; 8: e54160). During logarithmic growth on rich media, a yeast cell cont…	Setaria italica	XLOC_051487		-1.93334	0.000799423	24Fe/UT
chr4	XLOC_051490	Germin-like protein 1a, oxalate oxidase ; enhances tolerance to geminivirus infection in transgenic tobacco. Involved in the defense response to viral pathogens in other plants. GLPs play a role in the reinforcement of plant cell wall, giving plant resistance to biotic and abiotic stresses. GLPs have been classified into subfamilies based on having oxalate oxidase (OXO) or superoxide dismutase (S…		XLOC_051490		2.77813	0.000980472	24Fe/UT
chr4	MLOC_10176	Serpin-Z4; a major component of the endosperm albumin, this protein acts as a storage protein during grain filling, contributing a substantial part of the grain's lysine. May have an inhibitory function during filling or germination. Inhibits cathepsin G in vitro. Likely involved in defence response (J Exp Bot 2003, 54:2251-63; Eur J Biochem 1990, 194:499-505).		XLOC_051674		2.82635	1.59e-07	24Fe/UT
chr4	MLOC_64966	Peroxidase 4; removal of H2O2 (heme, Ca binding), oxidation of toxic reductants, biosynthesis and degradation of lignin, suberization, auxin catabolism, response to environmental stresses such as wounding, pathogen attack and oxidative stress. These functions might be dependent on each isozyme/isoform in each plant tissue.	Triticum urartu	XLOC_051799		-1.74774	0.00593415	24Fe/UT
chr4	XLOC_052011	beta-amylase 1, thioredoxin-regulated beta-amylase; can use p-nitrophenyl maltopentaoside (PNPG5) as substrate only in reduced form. Can play a minor role in the starch degradation and maltose metabolism in chloroplasts during the night. More active on phosphorylated glucan. Interacts directly with starch or other alpha-1,4-glucan. Hydrolysis of (1->4)-alpha-D-glucosidic linkages in polysaccharid…		XLOC_052011		4.82231	1.49e-08	24Fe/UT
chr4	XLOC_052012	beta-amylase 1, thioredoxin-regulated beta-amylase; can use p-nitrophenyl maltopentaoside (PNPG5) as substrate only in reduced form. Can play a minor role in the starch degradation and maltose metabolism in chloroplasts during the night. More active on phosphorylated glucan. Interacts directly with starch or other alpha-1,4-glucan. Hydrolysis of (1->4)-alpha-D-glucosidic linkages in polysaccharid…		XLOC_052012		4.24227	8.43e-11	24Fe/UT
chr4	MLOC_14363	Zinc finger protein NUTCRACKER like, NUC; induced by short roots (PLoS Biol 2006, 4:e143; Genes Dev 2007, 21: 2196-2204)	Brachypodium distachyon	XLOC_052334		-2.06027	0.0058613	24Fe/UT
chr4	MLOC_64857	4-coumarate--CoA ligase-like 4-like; likely catalyzes the synthesis of hydroxycinnamate-CoA thioesters, the precursors of lignin and other important phenylpropanoids. The phenylpropanoid pathway is one of the most important secondary metabolism pathways in plants. It diverts carbon flows from primary metabolism pathways, in the form of Phe, to an array of diverse products, in response to internal…	Brachypodium distachyon	XLOC_052509		-1.92669	0.00640896	24Fe/UT
chr4	MLOC_65022	CMd subunit of tetrameric alpha-amylase inhibitor; see Plant Mol Biol. 1997, 34:331-8. Involved in defence mechanism aggainst insect those trying to digent and use the strach (Genes & Genomics 2011, 33:357-364).	Hordeum vulgare	XLOC_052531		3.01746	6.47e-06	24Fe/UT
chr4	XLOC_052787	Similar to a small part of the 18S ribosomal RNA gene		XLOC_052787		-1.56503	0.00798173	24Fe/UT
chr4	XLOC_053055	Ribulose-1,5-bisphosphate carboxylase activase; activation of RuBisCO (ribulose-1,5-bisphosphate carboxylase/oxygenase; EC 4.1.1.39) involves the ATP-dependent carboxylation of the epsilon-amino group of lysine leading to a carbamate structure. Ribulose-1,5-bisphosphate carboxylase oxygenase, commonly known by the abbreviation RuBisCO, is an enzyme involved in the first major step of carbon fixat…	Triticum aestivum	XLOC_053055		1.92453	0.00424083	24Fe/UT
chr4	MLOC_65292	Probable galacturonosyltransferase-like 7 (GATL7); may be involved in pectin and/or xylans biosynthesis in cell walls (Proc Natl Acad Sci U S A 2006, 103:5236-41).	Brachypodium distachyon	XLOC_053120		-1.82015	0.00702335	24Fe/UT
chr4	XLOC_053214	beta-amylase; can use p-nitrophenyl maltopentaoside (PNPG5) as substrate only in reduced form. Can play a minor role in the starch degradation and maltose metabolism in chloroplasts during the night. More active on phosphorylated glucan. Interacts directly with starch or other alpha-1,4-glucan. Hydrolysis of (1->4)-alpha-D-glucosidic linkages in polysaccharides so as to remove successive maltose …		XLOC_053214		2.16381	0.00118023	24Fe/UT
chr4	MLOC_12143	Alpha-amylase/trypsin inhibitor; it could be involved in insect defense mechanisms (Plant Mol Biol 1990, 14:845-53).		XLOC_053669		2.62024	0.000513393	24Fe/UT
chr4	MLOC_14923	Xyloglucan xyloglucosyl transferase; molecular interactions between wall polysaccharides, which include cellulose and a range of noncellulosic polysaccharides such as xyloglucans and (1,3;1,4)-beta-D-glucans, are fundamental to cell wall properties. These interactions have been assumed to be noncovalent in nature in most cases. Barley xyloglucan xyloglucosyl transferase HvXET5 (EC 2.4.1.207), a m…		XLOC_053785		-2.56702	0.000276837	24Fe/UT
chr4	XLOC_054966	Retrotransposon: Sukkula LTR-2		XLOC_054966		3.40884	0.00309803	24Fe/UT
chr4	XLOC_056423	Retrotransposon: RLG_BAGY2-3		XLOC_056423		6.80882	0.000159682	24Fe/UT
chr4	XLOC_057839	Retrotransposon: athila, RLG_Sabrina_consensus-1		XLOC_057839		5.09271	6.73e-06	24Fe/UT
4HL	MLOC_34794	Receptor-like protein kinase HERK 1, Protein HERCULES RECEPTOR KINASE 1; cell elongation in plants is controlled by environmental cues such as light and internal growth regulators including plant steroid hormones, brassinosteroids (BRs). In this study, we found that 3 related receptor-like kinases (RLKs), HERCULES1, THESEUS1, and FERONIA, are transcriptionally induced by BRs and are down-regulate…	Aegilops tauschii	XLOC_058753		-2.52414	0.000231905	24Fe/UT
4HL	XLOC_059311	Uncharacterized	Brachypodium distachyon	XLOC_059311		-2.2134	0.00393589	24Fe/UT
4HL	XLOC_059627	Uncharacterized		XLOC_059627		3.18857	0.00241532	24Fe/UT
4HL	XLOC_063259	Tanslation elongation factor 1 alpha-subunit (TEF1)	Triticum aestivum	XLOC_063259		-2.26004	0.00702335	24Fe/UT
4HS	MLOC_62985	ATPase coupled to transmembrane movement of substances, ABC transporter G-25	Zea mays	XLOC_063748		-2.20267	0.00014068	24Fe/UT
4HS	XLOC_063867	Peptide transporter PTR2, Peptide/nitrate transporter At5g62680-like, Peptide transporter PTR2, NTR1, PTR2-B, ARABIDOPSIS THALIANA PEPTIDE TRANSPORTER 2, ATPTR2, ATPTR2-B, NITRATE TRANSPORTER 1, NTR1, PEPTIDE TRANSPORTER 2, PTR2, PTR2-B;; the Major Facilitator Superfamily (MFS) is a large and diverse group of secondary transporters that includes uniporters, symporters, and atiporters. MFS protein…	Aegilops tauschii	XLOC_063867		-2.18827	0.00241532	24Fe/UT
4HS	XLOC_066170	25S ribosomal RNA; a component of the large (60S) ribosomal subunit.		XLOC_066170		-2.81507	4.41e-08	24Fe/UT
chr5	GSP-1	Grain softness protein; a member of Alpha-Amylase Inhibitors (AAIs) and Seed Storage (SS) protein subfamily; they are mainly present in the seeds of a variety of plants. AAIs play an important role in the natural defenses of plants. Wheat Gsp1b underwent different proteolytic cleavages both in the N and C-terminal extremities of the preproprotein and does not interact in vitro with lipids (Journa…		XLOC_067132		3.62382	0.00238878	24Fe/UT
chr5	MLOC_40499	Putative mitochondrial chaperone BCS1-B, BCS1-like protein 2; chaperone necessary for the assembly of mitochondrial respiratory chain complex III (see J Cell Sci 2008, 121:2588-2600).	Aegilops tauschii	XLOC_067493		-1.58542	0.00968612	24Fe/UT
chr5	MLOC_5324	Chalcone--flavonone isomerase-like or Fatty-acid-binding protein 2 (see Nature 2012, 485:530-39), Vacuolar-sorting receptor 1 or Epidermal growth factor receptor-like protein 1 (this gene covers just 216 amino acids of N-terminal region); Vacuolar-sorting receptor (VSR) involved in clathrin-coated vesicles sorting from Golgi apparatus to vacuoles. Required for the sorting of 12S globulin, 2S albu…	Brachypodium distachyon	XLOC_067603		-2.52863	0.00165259	24Fe/UT
chr5	MLOC_71090	Receptor like protein kinase S.2-like	Setaria italica	XLOC_067671		-2.04776	0.0027677	24Fe/UT
chr5	MLOC_18265	Phosphoribosylanthranilate transferase; involved in aromatic amino acid biosynthesis (J Bacteriol 1974, 117: 502-508; Plant Physiol 1992, 100:582-592).	Zea mays	XLOC_067709		-2.6251	0.00159132	24Fe/UT
chr5	MLOC_10755	Nucleobase-ascorbate transporter 6 (see Plant Cell Physiol 2006, 47:1381-1393)	Aegilops tauschii	XLOC_067793		-1.90901	0.00421146	24Fe/UT
chr5	MLOC_64421	Serine/threonine-protein kinase HT1-like, High leaf temperature protein 1; serine/threonine kinase involved in the control of stomatal movement in response to CO2. Shows a reduced response to ABA or light compared to CO2 (see Nat Cell Biol 2006, 8:391-7; Ann Bot 2012, 109:5-17).	Brachypodium distachyon	XLOC_068167		1.69471	0.0083696	24Fe/UT
chr5	MLOC_52788, TUA4	Alpha tubulin-4A; tubulin is the major constituent of microtubules. It binds two moles of GTP, one at an exchangeable site on the beta chain and one at a non-exchangeable site on the alpha chain.	Triticum aestivum	XLOC_068426		-1.73665	0.00424083	24Fe/UT
chr5	MLOC_79115	25.3 kDa vesicle transport protein-like; Longin is one of the approximately 26 components required for transporting proteins from the ER to the plasma membrane, via the Golgi apparatus. This isoform does not have the domain Synaptobrevin which is essential for fast exocytosis for neurotransmitter release and fast endocytosis that mediates rapid reuse of synaptic vesicles (see Nature Cell Biology …	Brachypodium distachyon	XLOC_068484		-1.87395	0.000742599	24Fe/UT
chr5	XLOC_068881	Hordoindoline-b1; acts as a membranotoxin, probably through its antibacterial and antifungal activities, contributing to the defense mechanism of the plant against predators. Forms monovalent cation-selective ion channels in membranes.		XLOC_068881		2.62024	0.000513393	24Fe/UT
chr5	XLOC_069006	GDP dissociation inhibitor protein; regulates the GDP/GTP exchange reaction of most Rab proteins by inhibiting the dissociation of GDP from them, and the subsequent binding of GTP to them. Involved in D-xylose metabolic process, hydrogen peroxide biosynthetic process, protein desumoylation, protein transport, regulation of transport, vegetative to reproductive phase transition of meristem, vesicl…		XLOC_069006		4.18542	0.00369724	24Fe/UT
chr5	MLOC_5735	Metacaspase 2; involved in PCD through TSN (tudor staphylococcal nuclease) see Nature Cell Biology 2009, 11: 1347-54.	Aegilops tauschii	XLOC_069280		-1.60502	0.00822742	24Fe/UT
chr5	MLOC_60829	Brassinosteroid insensitive 1-like protein 1, Serine/threonine-protein kinase BRI1-like 1-like; plasma membrane receptor with a serine/threonine-protein kinase activity. Regulates, in response to brassinosteroid binding, a signaling cascade involved in plant development. Binds brassinolide. May be involved in cell growth and vascular differentiation.	Brachypodium distachyon	XLOC_069376		-3.44541	9.77e-09	24Fe/UT
chr5	MLOC_10405	Phosphoenolpyruvate carboxylase (PEPC) 2, involved in carbon dioxide fixation (photosynthesis); it uses magnesium as cofactor and found in cytosol and apoplatic environment. After conversion of CO2 to bicarbonate by carbonic anhydrase, PEP carboxylase assimilates the available bicarbonate into a four-carbon compound (oxaloacetate, which is further converted to malate) that can be stored or shuttl…		XLOC_069441		-2.02715	0.000224914	24Fe/UT
chr5	XLOC_069594	Putitive miRNA; predicted by findMiRNA programm at http://linux1.softberry.com/berry.phtml?topic=findmirna&group=programs&subgroup=rnastruct [ All have similarty to Homo sapiens miR-3666] dir p-mi_b p-mi_e mi_beg mi_end pre-miRNA miRNA + 309 428 334 354 uauuuacacuuggacaucaucuaugugugugagugugccuuugauccuaacuaaauugguggagggucaaaugcauaacccugccaucuagcuagguucaagucuugcacuuggacuuua ugugugagugugccuuugauc + …		XLOC_069594		3.64855	8.32e-05	24Fe/UT
chr5	MLOC_7399	Putative cyclic nucleotide-gated ion channel 14; Cyclic nucleotide-gated (CNG) channels are nonselective cation channels first identified in retinal photoreceptors and olfactory sensory neurons (OSNs). They are opened by the direct binding of cyclic nucleotides, cAMP and cGMP. Although their activity shows very little voltage dependence, CNG channels belong to the superfamily of voltage-gated ion…	Aegilops tauschii	XLOC_069863		-1.71164	0.00930819	24Fe/UT
chr5	MLOC_32662	Receptor-like protein kinase FERONIA; a Receptor-like protein kinase that mediates the female control of male gamete delivery during fertilization, including growth cessation of compatible pollen tubes ensuring a reproductive isolation barriers. Required for cell elongation during vegetative growth, mostly in a brassinosteroids- (BR-) independent manner. Induced by brassinosteroids (BR) and invol…	Aegilops tauschii	XLOC_069905		2.65256	0.000387486	24Fe/UT
chr5	XLOC_070920	Retrotransposon Sukkula_N5D-1		XLOC_070920		5.43532	1.31e-09	24Fe/UT
chr5	XLOC_072276	Retrotransposon:RLG_BAGY2-3		XLOC_072276		7.10894	1.72e-05	24Fe/UT
chr5	XLOC_072497	hAT transposon superfamily protein	Arabidopsis thaliana	XLOC_072497		1.68822	0.0099333	24Fe/UT
chr5	XLOC_072986	Retrotransposon, gypsy, LTR, Sukkula_AY661558-7		XLOC_072986		3.5784	0.00308141	24Fe/UT
chr5	XLOC_073567	Putative anaerobic C4-dicarboxylate transporter, Anaerobic c4-dicarboxylate membrane transporter; involved in transportation of C(4)-dicarboxylates such as malate, fumarate, and succinate (J Bacteriol 2011, 193:4307-16; J Bacteriol 1994, 176:6470-6478). see also the induced CBL-INTERACTING PROTEIN which is induced as well. This is a vacuolar localized protein predicted by PlantLoc server.		XLOC_073567		2.2426	0.000970824	24Fe/UT
chr5	XLOC_075277	Uncharacterized		XLOC_075277		6.16035	1.59e-10	24Fe/UT
5HL	MLOC_38405	Uncharacterized		XLOC_076234		-2.16995	0.000133803	24Fe/UT
5HL	Metazoa_SRP	The signal recognition particle RNA; also known as 7SL, 6S, ffs, or 4.5S RNA, is the RNA component of the signal recognition particle (SRP) ribonucleoprotein complex. SRP is a universally conserved ribonucleoprotein that directs the traffic of proteins within the cell and allows them to be secreted. The SRP RNA, together with one or more SRP proteins contributes to the binding and release of the …		XLOC_076351		-3.14531	7.05e-08	24Fe/UT
5HL	MLOC_78140	Serpin-Z7; inhibits chymotrypsin in vitro (Serine protease inhibitor). Proteins of the serpin superfamily (approximately 43 kDa) from mature cereal grains are in vitro suicide-substrate inhibitors of specific mammalian serine proteinases of the chymotrypsin family. Plant serpins are likely to use their irreversible inhibitory mechanism in the inhibition of exogenous proteinases capable of breakin…	Aegilops tauschii	XLOC_076420		4.37378	1.33e-05	24Fe/UT
5HL	MLOC_64667	Hydroxycinnamoyl-Coenzyme A shikimate/quinate hydroxycinnamoyltransferase-like; silencing of Hydroxycinnamoyl-Coenzyme A Shikimate/Quinate Hydroxycinnamoyltransferase Affects Phenylpropanoid Biosynthesis. In plants, phenylpropanoids fulfil a vast array of important functions, being involved in development and interactions with the environment. For example, stilbenes, coumarins, and isoflavonoids …	Brachypodium distachyon	XLOC_076872		-2.54899	0.00648898	24Fe/UT
5HL	XLOC_077298	Retroposon Au element	Aegilops juvenalis	XLOC_077298		2.00284	0.00254732	24Fe/UT
5HL	XLOC_079221	Uncharacterized		XLOC_079221		4.20475	4.15e-05	24Fe/UT
5HL	XLOC_080653	Putative mitochondrial chaperone BCS1-B, AAA-type ATPase-like, Cell Division Protein AAA ATPase family, 26S protease regulatory subunit 4-like ; chaperone necessary for the assembly of mitochondrial respiratory chain complex III.	Triticum urartu	XLOC_080653		-3.07793	2.83e-06	24Fe/UT
5HL	XLOC_080874	Uncharacterized		XLOC_080874		-2.05552	0.00164121	24Fe/UT
5HS	MLOC_52153	MFS/PTR protein, Probable peptide/nitrate transporter At5g62680-like; the Major Facilitator Superfamily (MFS) is a large and diverse group of secondary transporters that includes uniporters, symporters, and atiporters. MFS proteins facilitate the transport across cytoplasmic or internal membranes. Some members of the NRT1 family are dipeptide transporters, called PTRs, which transport a broad spe…	Brachypodium distachyon	XLOC_081403		-1.65592	0.00989084	24Fe/UT
5HS	XLOC_081462	Uncharacterized		XLOC_081462		7.48205	8.45e-07	24Fe/UT
5HS	XLOC_081622	Uncharacterized		XLOC_081622		3.37256	0.00383498	24Fe/UT
5HS	MLOC_51930	Ocs-element binding factor 1; The ocs-elements comprise a family of related 20-base pair DNA sequences with dyad symmetry that are functional components of the promoters of several genes introduced into the plant nucleus by Agrobacterium transformation or infection by DNA viruses. We describe the isolation and characterization of a maize cDNA that encodes a protein, OCSBF-1, that binds specifical…	Secale cereale	XLOC_081741		-1.86319	0.000770289	24Fe/UT
5HS	XLOC_083153	Uncharacterized		XLOC_083153		3.38094	0.00906957	24Fe/UT
chr6	XLOC_084503	Retroposon: Sukkula LTR-2		XLOC_084503		4.97056	1.82e-05	24Fe/UT
chr6	MLOC_74702	Protein kinase APK1A, chloroplastic; a dual-specificity kinase that phosphorylate both Ser/Thr and Tyr residues.	Aegilops tauschii	XLOC_084662		-2.66821	1.07e-05	24Fe/UT
chr6	MLOC_12878	EIN3-binding F-box protein 1-like (EBF1); a regulator of the ethylene signaling cascade by modulating the stability of EIN3 (ethylene-insensitive) and EIL1 proteins (see The Plant Cell 2007, 19:509-523).	Brachypodium distachyon	XLOC_084752		-2.47035	7.51e-05	24Fe/UT
chr6	MLOC_68362	Cytochrome P450 86B1-like; heme containing enzyme involved in very long chain fatty acids (VLCFA) omega-hydroxylation. Required for the synthesis of saturated VLCFA alpha, omega-bifunctional suberin monomers (see Plant Physiol 2009, 150:1831-43; Plant Physiol 2009, 151:1317-28).	Brachypodium distachyon	XLOC_084804		-2.63865	0.000127891	24Fe/UT
chr6	XLOC_084808	Putative non-LTR retroelement reverse transcriptase; RT_nLTR: Non-LTR (long terminal repeat) retrotransposon and non-LTR retrovirus reverse transcriptase (RT). This subfamily contains both non-LTR retrotransposons and non-LTR retrovirus RTs. RTs catalyze the conversion of single-stranded RNA into double-stranded DNA for integration into host chromosomes. RT is a multifunctional enzyme with RNA-di…	Sorghum bicolor	XLOC_084808		6.91531	5.6e-31	24Fe/UT
chr6	MLOC_60633	HvYS15, iron-phytosiderophore (Fe-MA) transporter (OPT SUPERFAMILY); involved in uptake of iron(III)-MA, but not iron-nicotianamine (NA)[see Plant J 2006, 46:563-72; FEBS Lett 2007, 581:4298-302). For HvYS2 see Plant Cell Physiol 2011, 52:1931-40. HvYS1 expression was not induced by any other metal deficiency and showed a distinct diurnal rhythm, reaching a maximum before the onset of phytosidero…		XLOC_084948		3.37256	0.00383498	24Fe/UT
chr6	MLOC_11567	HAK16, Putative potassium transporter 16	Aegilops tauschii	XLOC_085128		-7.08512	3.07e-05	24Fe/UT
chr6	MLOC_12153	Phosphate transporter PHO1-2-like; is involved in Pi xylem loading (see Plant Cell 2012, 24:2168-2183)	Brachypodium distachyon	XLOC_085398		-1.59008	0.00801106	24Fe/UT
chr6	MLOC_66998	Chalcone synthase 8 (CHS8); involved in flavonoid biosynthesis. CHS gene expression is induced in plants under stress conditions such as UV light, bacterial or fungal infection. CHS expression causes accumulation of flavonoid and isoflavonoid phytoalexins and is involved in the salicylic acid defense pathway (Phytochem Rev 2011, 10: 397-412).	Aegilops tauschii	XLOC_085530		-5.31966	1.63e-09	24Fe/UT
chr6	MLOC_77869	Serine carboxypeptidase 3 (CBP3); secreted . Most SCPs have a signal sequence that directs their translocation into the secretory pathway and are believed to be vacuolar, since they are active at acidic pH. However, one Arabidopsis SCP, Brassinosteroid Insensitive1 Suppressor (BRS1), has been shown to be located outside the cell. BRI1 is a receptor for brassinosteroids and is involved in the sign…		XLOC_085592		-2.0708	0.00254732	24Fe/UT
chr6	MLOC_52928	Glucuronokinase 1-like; the main precursor for primary cell walls is UDP-glucuronic acid, which can be synthesized via two independent pathways. Each provides about 50% of the cell wall biomass. One starts with the ring cleavage of myo-inositol (needs inositol-1-P) into glucuronic acid, which requires a glucuronokinase (see J Biol Chem 2010, 285:2902-10).	Setaria italica	XLOC_085662		-1.84116	0.00656096	24Fe/UT
chr6	MLOC_62478	S-adenosylmethionine decarboxylase; plays an essential regulatory role in the polyamine (as spermidine and spermine) biosynthetic pathway. It uses pyruvate residue as a cofactor rather than the more common pyridoxal 5'-phosphate.	Triticum aestivum	XLOC_086073		-1.6762	0.00397706	24Fe/UT
chr6	MLOC_65203	Trehalose-phosphate phosphatase-like; involved in trehalose biosynthetic process. Trehalose serves as a stress protectant and/or reserve carbohydrate (see Plant Mol Biol 2005, 58:751-62). Yeast trehalose-6-phosphate synthase (TPS1) gene exhibit improved drought tolerance in potato (BMC Plant Biol 2012, 30;12:74).	Brachypodium distachyon	XLOC_086374		-2.28808	0.000349336	24Fe/UT
chr6	XLOC_086404	16S rRNA	Triticum aestivum	XLOC_086404		-1.68987	0.00425469	24Fe/UT
chr6	MLOC_62872	Phosphatidylinositol-4-phosphate 5-kinase 9 (PIP5K9), 1-phosphatidylinositol 4-phosphate kinase 9, Diphosphoinositide kinase 9; plays a role in sugar-mediated root development. Interaction with CINV1 induces repression of CINV1 activity and negative regulation of sugar-mediated root cell elongation. Catalyzes ATP + 1-phosphatidyl-1D-myo-inositol 4-phosphate = ADP + 1-phosphatidyl-1D-myo-inositol …	Triticum urartu	XLOC_086718		2.0657	0.00119195	24Fe/UT
chr6	XLOC_086755	Uncharacterized		XLOC_086755		4.59514	7.12e-06	24Fe/UT
chr6	XLOC_087245	Mitochondrion 16S ribosomal RNA	Lolium perenne	XLOC_087245		-1.18415	0.00964743	24Fe/UT
chr6	XLOC_087576	Retrotransposon, gypsy, LTR, Sukkula_AY661558-7		XLOC_087576		4.23433	3.31e-05	24Fe/UT
chr6	XLOC_088201	Tubulin beta-3 chain-like; tubulin is the major constituent of microtubules. It binds two moles of GTP, one at an exchangeable site on the beta chain and one at a non-exchangeable site on the alpha chain. TUBB3 plays a critical role in proper axon guidance and mantainance.	Brachypodium distachyon	XLOC_088201		-2.49299	0.000780185	24Fe/UT
6HL	XLOC_091949	Mitochondrion 26S ribosomal RNA	Coffea arabica, Lolium perenne	XLOC_091949		-1.71632	0.00327108	24Fe/UT
6HL	MLOC_77128	Uncharacterized		XLOC_092105		1.935	0.0074474	24Fe/UT
6HL	XLOC_092302	AP-1 complex subunit gamma-2, Adapter-related protein complex 1 subunit gamma-2, Adaptor protein complex AP-1 large subunit gamma-2, Clathrin assembly protein complex 1 gamma-2 large chain Gamma-adaptin 2; Subunit of clathrin-associated adaptor protein complex 1 that plays a role in protein sorting in the late-Golgi/trans-Golgi network (TGN) and/or endosomes. The AP complexes mediate both the rec…	Triticum urartu	XLOC_092302		3.95674	1.13e-12	24Fe/UT
6HL	XLOC_092815	Putitive miRNA; Putitive miRNA predicted by findMiRNA programm at http://linux1.softberry.com/berry.phtml?topic=findmirna&group=programs&subgroup=rnastruct dir p-mi_b p-mi_e mi_beg mi_end pre-miRNA miRNA [all show similarity to hvu-MIR5048, Glycine max miR4371a, and Brassica napus miR156b] + 556 675 649 669 uuaauuugcaucugcguagccguagcgcugccaugucgagugucaucgugguguccaguucugucgccgugcagagcagcagcagaugca…		XLOC_092815		-2.40145	0.00104242	24Fe/UT
6HL	XLOC_095147	Mitochondrial large subunit ribosomal RNA	Chloranthus multistachys	XLOC_095147		-1.87396	0.000770289	24Fe/UT
6HS	MLOC_7763	Phosphoethanolamine/phosphocholine phosphatase (PHOSPHO1); Phosphatase that has a high activity toward phosphoethanolamine (PEA) and phosphocholine (PCho). Involved in the generation of inorganic phosphate for bone mineralization in human (Biochem J 2004, 382:59-65). Likely involved in Pi release from intracellular phosphorylated metabolites under deficiency conditions (Biochim Biophys Acta 2012,…	Aegilops tauschii	XLOC_095452		-2.53923	0.000176591	24Fe/UT
6HS	MLOC_42402	Uncharacterized		XLOC_095616		-3.22085	2.91e-10	24Fe/UT
6HS	XLOC_095617	25S ribosomal RNA; component of the large (60S) ribosomal subunit		XLOC_095617		-3.59696	3.17e-12	24Fe/UT
6HS	XLOC_095864	Mitochondrial small subunit of ribosomal protein 7	Triticum aestivum	XLOC_095864		-1.82228	0.00784506	24Fe/UT
6HS	XLOC_096020	25S ribosomal RNA; component of the large (60S) ribosomal subunit		XLOC_096020		-3.21398	3.01e-10	24Fe/UT
6HS	XLOC_097890	Mutator-like transposase; MuDR family transposase is found in plant and are presumed to be the transposases for Mutator transposable elements.	Zea mays	XLOC_097890		6.76035	0.000224914	24Fe/UT
chr7	MLOC_13047	Putative LRR receptor-like serine/threonine-protein kinase; see BMC Genomics 2010, 11:19.	Aegilops tauschii	XLOC_099100		6.54835	0.000619356	24Fe/UT
chr7	XLOC_099298	Putative LRR receptor-like serine/threonine-protein kinase; involved in protein phosphorylation, transmembrane receptor protein tyrosine kinase signaling pathway.	Aegilops tauschii	XLOC_099298		2.09294	0.00852037	24Fe/UT
chr7	MLOC_72171	Sister chromatid cohesion PDS5-B-B-like protein; plays a role in androgen-induced proliferative arrest. Required for maintenance of sister chromatid cohesion during mitosis.	Aegilops tauschii	XLOC_099508		1.8805	0.00648898	24Fe/UT
chr7	XLOC_099616	Uncharacterized		XLOC_099616		3.53151	0.00393589	24Fe/UT
chr7	MLOC_13370	Auxin-induced in root cultures protein 12-like; expressed during auxin-induced lateral root formation (Plant Mol Biol 1999, 39:273-87). Auxin, haemin, and CO promotes lateral root development. This occurs also by overexpression of HO1 (Plant Sci 2012, 184:63-74).	Setaria italica	XLOC_099673		1.95492	0.00784506	24Fe/UT
chr7	XLOC_099747	Bidirectional sugar transporter SWEET11; mediates both low-affinity uptake and efflux of sugar across the plasma membrane. Required for pollen viability. Involved in the transport of copper, in cooperation with COPT1 and COPT2. Confers sensitivity to bacterial blight mediated by X.oryzae pv. oryzae (Xoo) in its Xa13 allelic form (e.g. cv. IR24), probably by providing the sugar required for the pa…	Triticum urartu	XLOC_099747		-1.16801	0.00834844	24Fe/UT
chr7	MLOC_55995	Xylosyltransferase 2; catalyzes the first step in biosynthesis of glycosaminoglycan. Disrupting two Arabidopsis thaliana xylosyltransferase genes results in plants deficient in xyloglucan, a major primary cell wall component (The Plant Cell 2008, 20: 1519-1537). In animal models it is also involved in virus entry (Retrovirology 2011, 8(Suppl 1):A201).	Triticum urartu	XLOC_099878		-1.84227	0.00698993	24Fe/UT
chr7	MLOC_51849	Glucan endo-1,3-beta-glucosidase 11, Beta-1,3-endoglucanase 11; involved in cell wall biogenesis and plant defence.	Triticum urartu	XLOC_099957		-1.8241	0.00231716	24Fe/UT
chr7	MLOC_65378	Caffeic acid 3-O-methyltransferase (COMT), S-adenosysl-L-methionine:caffeic acid 3-O-methyltransferase; catalyzes the conversion of caffeic acid to ferulic acid and of 5-hydroxyferulic acid to sinapic acid. The resulting products may subsequently be converted to the corresponding alcohols that are incorporated into lignins. Lignin is the major structural component of secondarily thickened plant c…	Aegilops tauschii	XLOC_099994		-1.78921	0.00393589	24Fe/UT
chr7	MLOC_17055	Beta-galactosidase 9; hydrolysis of terminal non-reducing beta-D-galactose residues in beta-D-galactosides	Aegilops tauschii	XLOC_100019		-1.75535	0.00250697	24Fe/UT
chr7	MLOC_54859	SPX domain-containing protein 1 (SPX1)-like; plays a positive role in plant adaptation to phosphate starvation. Up-regulated under phosphate starvation (Plant J 2008, 54:965-75). Four genes of Arabidopsis (At5g20150, At2g26660, At2g45130 and At5g15330) encoding no conservative region other than an SPX domain (SYG1, Pho81 and XPR1) were named AtSPX1-AtSPX4. AtSPX1 and AtSPX2 are localized exclusiv…	Brachypodium distachyon	XLOC_100112		1.79195	0.00947086	24Fe/UT
chr7	XLOC_100423	Uncharacterized		XLOC_100423		-2.18301	0.00024891	24Fe/UT
chr7	XLOC_100427	Uncharacterized		XLOC_100427		-2.14542	0.000412501	24Fe/UT
chr7	XLOC_100429	Uncharacterized		XLOC_100429		-1.55864	0.00952486	24Fe/UT
chr7	MLOC_62049	Mediator of RNA polymerase II transcription subunit 15a-like isoform X4	Setaria italica	XLOC_100508		1.50109	0.00988305	24Fe/UT
chr7	MLOC_57679	GDSL esterase/lipase At5g45910-like isoform 1; involved in lipid degradation.	Brachypodium distachyon	XLOC_100853		-2.91846	1.4e-05	24Fe/UT
chr7	XLOC_100917	Retrotransposon:RLG_Sukkula-1		XLOC_100917		5.20071	1.79e-08	24Fe/UT
chr7	MLOC_44861	4-hydroxyphenylacetaldehyde oxime monooxygenase (CYP71E1); involved in the biosynthesis of the cyanogenic glucoside dhurrin. Catalyzes the conversion of p-hydroxyphenylacetaldoxime to p-hydroxymandelonitrile in dhurrin biosynthesis. The dehydration of the oxime to the corresponding nitrile is followed by a C-hydroxylation of the nitrile to produce p-hydroxymandelonitrile (see Plant Mol Biol 1998,…	Aegilops tauschii	XLOC_100949		-2.05864	0.00483419	24Fe/UT
chr7	MLOC_72278	Alpha-amylase inhibitor, Alpha-amylase/trypsin inhibitor; It could be involved in insect defense mechanisms.		XLOC_101040		2.13246	0.00370963	24Fe/UT
chr7	MLOC_37056	Chitinase-like protein PB1E7.04c-like; Chitinases are up-regulated by a variety of stress conditions, both biotic and abiotic, and by such phytohormones as ethylene, jasmonic acid, and salicylic acid. Like other PR proteins, chitinases play a role in plant resistance against distinct pathogens. Moreover, by reducing the defence reaction of the plant, chitinases allow symbiotic interaction with ni…	Setaria italica	XLOC_101363		-2.83626	0.00191637	24Fe/UT
chr7	MLOC_58425	Nitrate transporter 1.2-like; low-affinity proton-dependent nitrate transporter. Involved in constitutive nitrate uptake. Not involved in histidine or dipeptides transport (Plant Cell 1999, 11:1381-1392).	Brachypodium distachyon	XLOC_101636		2.85019	0.00611008	24Fe/UT
chr7	MLOC_58093	Keratin-3, type I cytoskeletal 51 kDa-like; in volved in cell structure.	Setaria italica	XLOC_101708		-2.73459	0.000980472	24Fe/UT
chr7	MLOC_71259	Phospholipase D alpha 2; hydrolyzes glycerol-phospholipids at the terminal phosphodiesteric bond. Plays an important role in various cellular processes. Catalyzes A phosphatidylcholine + H2O = choline + a phosphatidate.	Triticum urartu	XLOC_101727		-1.73811	0.00996752	24Fe/UT
chr7	MLOC_57343	G-type lectin S-receptor-like serine/threonine-protein kinase At2g19130; induced by ABA, salt, and drought stresses in Glycine soja. Its overexpression in Arabidopsis, enhances salt tolerance and higher yields under salt stress, with higher chlorophyll content, lower ion leakage, higher plant height, and more siliques at the adult developmental stage (J Plant Physiol 2013, 170:505-15).	Brachypodium distachyon	XLOC_101826		3.5603	1.08e-05	24Fe/UT
chr7	MLOC_11419	Putative LRR receptor-like serine/threonine-protein kinase; with Usp domain as universal stress protein whose expression is enhanced when the cell is exposed to stress agents. Usp enhances the rate of cell survival during prolonged exposure to such conditions.	Aegilops tauschii	XLOC_102005		-3.78997	6.44e-12	24Fe/UT
chr7	XLOC_102006	Uncharacterized		XLOC_102006		-1.52005	0.00932128	24Fe/UT
chr7	XLOC_102035	Uncharacterized		XLOC_102035		-2.01608	0.00129195	24Fe/UT
chr7	XLOC_102046	Uncharacterized		XLOC_102046		-1.52591	0.00756719	24Fe/UT
chr7	XLOC_102179	Pathogenesis-related protein 1C, Thaumatin-like protein PWIR2; involved in plant biotic defence response (Plant Mol Biol 1991, 17:283-5).		XLOC_102179		5.99787	8.56e-10	24Fe/UT
chr7	XLOC_102424	Uncharacterized		XLOC_102424		-1.9335	0.00853362	24Fe/UT
chr7	XLOC_104412	Ribulose-1,5-bisphosphate carboxylase/oxygenase large subunit; ribulose-1,5-bisphosphate carboxylase oxygenase, commonly known by the abbreviation RuBisCO, is an enzyme involved in the first major step of carbon fixation, a process by which atmospheric carbon dioxide is converted by plants to energy-rich molecules such as glucose. In chemical terms, it catalyzes the carboxylation of ribulose-1,5-…	Yushania emeryi, Brachystachyum densiflorum	XLOC_104412		2.27594	0.00354391	24Fe/UT
chr7	XLOC_104646	Uncharacterized		XLOC_104646		6.76035	0.000224914	24Fe/UT
7HL	MLOC_13299	ABC transporter B family member 19, similar to AtMDT1 (multidrug resistance); auxin efflux transporter that acts as a negative regulator of light signaling to promote hypocotyl elongation. Mediates the accumulation of chlorophyll and anthocyanin, as well as the expression of genes in response to light. Participates in auxin efflux and thus regulates the polar auxin basipetal transport (from auxin…	Aegilops tauschii	XLOC_108636		1.77996	0.00761391	24Fe/UT
7HL	XLOC_108893	Signal recognition particle (SRP) 7S RNA variant 1; SRPs make ribonucleoprotein complexes responsible for targeting proteins to the endoplasmic reticulum in eukarya or to the inner membrane in prokarya.	Triticum aestivum	XLOC_108893		-2.75137	0.00952486	24Fe/UT
7HL	XLOC_108963	Mitochondrial 26S rRNA	Triticum aestivum	XLOC_108963		5.01113	1.61e-09	24Fe/UT
7HL	XLOC_109641	Mitochondrial large subunit ribosomal RNA	Ptychomitrium incurvum	XLOC_109641		-1.63204	0.00803475	24Fe/UT
7HL	XLOC_110075	Uncharacterized		XLOC_110075		-3.58649	0.00906957	24Fe/UT
7HL	XLOC_111127	Ribulose-1,5-bisphosphate carboxylase/oxygenase large subunit	Hordeum cordobense, Arundinella hirta	XLOC_111127		2.2629	0.00798173	24Fe/UT
7HL	XLOC_111738	Uncharacterized		XLOC_111738		-2.29546	0.000178925	24Fe/UT
7HL	XLOC_111914	Subtilisin protease; subtilisins belong to subtilases, a group of serine proteases that initiate the nucleophilic attack on the peptide (amide) bond through a serine residue at the active site. Subtilisins typically have molecular weights of about 20,000 to 45,000 dalton.	Triticum aestivum	XLOC_111914		-2.26218	0.00929093	24Fe/UT
7HL	XLOC_112252	Heavy metal transporter (HMA2); a plasma membrane Zn/Cd transporter involved in root to shoot transportation (PLoS One 2012, 7:e42640). Barley HvHMA1 may exports Zn from chloroplasts (PLoS One 2012, 7:e49027). Barley metallothioneins MT3 and MT4 are localized in the grain aleurone layer and may involved in Zn/Cd chelation (Plant Physiol 2012, 159:1125-37). The plant P1B-type ATPase AtHMA4 transpo…		XLOC_112252		-2.01899	0.00308141	24Fe/UT
7HL	XLOC_112395	Retrotransposon, Sukkula LTR-2		XLOC_112395		4.37378	1.33e-05	24Fe/UT
7HS	MLOC_80715	tRNA-specific adenosine deaminase (chloroplastic), tRNA adenosine deaminase arginine, tRNA arginine adenosine deaminase; deaminates adenosines to inosines in tRNA-Arg(ACG). Exclusively involved in A-to-I editing of the prokaryote-type chloroplast-tRNA and not involved in C-to-U editing. Loss of cp-tRNA editing, decreased chloroplast translation and impaired photosynthesis. Since the absence of A-…	Triticum urartu	XLOC_112486		1.63653	0.00920185	24Fe/UT
7HS	MLOC_12349	Thaumatin-like protein 1-like; CLASSIFIED AS pathogenesis-related (PR) proteins (see BMC Plant Biology 2010, 10:191). Some thaumatin-like proteins hydrolyse polymeric beta-1,3-glucans (see Plant J. 1999, 19:473-80). Several thaumatin-like proteins bind to beta-1,3-glucans (see Plant Physiol 1998, 118:1431-8.	Setaria italica	XLOC_112749		-1.87756	0.00483419	24Fe/UT
7HS	MLOC_32427	Retrotransposon protein, putative, LINE subclass	Oryza sativa	XLOC_112956		-2.18965	0.00555525	24Fe/UT
7HS	MLOC_66390	Putative beta-1,3-glucanase; plasmodesmata (Pd), coaxial membranous channels that connect adjacent plant cells, are not static, but show a dynamic nature and can be opened or closed. These controlled changes in Pd conductivity regulate plant symplasmic permeability and play a role both in development and defense processes. One of the mechanisms shown to produce these changes is the deposition and…	Cenchrus americanus	XLOC_113055		-2.76431	0.000513393	24Fe/UT
morex_contig_110255	XLOC_117092	Uncharacterized		XLOC_117092		2.43995	0.00241532	24Fe/UT
morex_contig_121184	XLOC_117521	Putative iron-phytosiderophore transporter, Metal-nicotianamine transporter YSL16-like, OsYS1-like metal-nicotianamine transporter, AtYSL2 (Closest to Metal-phytosiderophore/metal-nicotianamine transporter ZmYS1), OPT superfamily; Os YSL16 is induced by iron deficiency (J Biol Chem 2009, 284:3470-9). OsYSL16 is a plasma membrane–localized transporter. OsYSL16 Is a Transporter of the Cu-NA Complex…	Brachypodium distachyon, Arabidopsis thaliana, Oryza sativa	XLOC_117521		-1.81895	0.00139605	24Fe/UT
morex_contig_142987	XLOC_118330	Tubby-like F-box protein 6-like; the expression of all the OsTLPs was induced on infection of Xanthomonas oryzae pv. oryzae, which causes bacterial blight, one of the most devastating diseases of rice worldwide. The maximal expression levels were observed at 2-8 h after infection for all the genes. Eight of the 14 OsTLPs were also responsive to wounding (Plant Cell Rep 2009, 28:113-21). Thus, the…	Brachypodium distachyon	XLOC_118330		-2.02643	0.00126669	24Fe/UT
morex_contig_150207	MLOC_9224	NADH dehydrogenase subunit 4L (mitochondrion), cytochrome c reductase; NADH dehydrogenase (cytochrome c reductase) is a flavoprotein that contains iron-sulfur centres.	Lolium perenne	XLOC_118604		-1.68407	0.00541234	24Fe/UT
morex_contig_1561900	MLOC_11828	Uncharacterized		XLOC_118923		-2.6995	0.00397706	24Fe/UT
morex_contig_1581474	XLOC_119385	18S ribosomal RNA	Aster integrifolius	XLOC_119385		-2.5562	4.61e-06	24Fe/UT
morex_contig_1592853	XLOC_119702	Putative serine/threonine-protein phosphatase BSL1, BSU1-like protein 1; phosphatase involved in elongation process, probably by acting as a regulator of brassinolide signaling. Perception of the plant steroid hormone brassinolide (BL) by the membrane-associated receptor kinase BRI1 triggers the dephosphorylation and accumulation in the nucleus of the transcriptional modulators BES1 and BZR1. We …	Setaria italica	XLOC_119702		2.277	0.00645513	24Fe/UT
morex_contig_161819	MLOC_23156	Putative gag-pol polyprotein, retrotransposon protein: Gag-Pol polyprotein and Gag polyprotein may regulate their own translation, by the binding genomic RNA in the 5'-UTR. At low concentration, Gag-Pol and Gag would promote translation, whereas at high concentration, the polyproteins encapsidate genomic RNA and then shutt off translation.	Oryza sativa	XLOC_120244		-2.52422	0.00301708	24Fe/UT
morex_contig_163230	XLOC_120504	Gibberellin 2-beta-dioxygenase 1, GA 2-oxidase 1, Gibberellin 2-beta-hydroxylase 1, Gibberellin 2-oxidase 1, Protein SLENDER; catalyzes the 2-beta-hydroxylation of several biologically active gibberellins, leading to the homeostatic regulation of their endogenous level. Catabolism of gibberellins (GAs) plays a central role in plant development. Converts GA9/GA20 to GA51/GA29 and GA4/GA1 to GA34/G…	Aegilops tauschii	XLOC_120504		-1.2343	0.0089895	24Fe/UT
morex_contig_1637070	XLOC_120586	Retrotransposon:RLG_Sukkula-1		XLOC_120586		6.94515	5.56e-05	24Fe/UT
morex_contig_1658654	MLOC_24862	ATP synthase subunit a, chloroplastic; key component of the proton channel; it plays a direct role in the translocation of protons across the membrane.	Triticum urartu	XLOC_120896		1.74682	0.00397706	24Fe/UT
morex_contig_173323	XLOC_121438	Retrotransposon protein, putative	Oryza sativa	XLOC_121438		2.43995	0.00241532	24Fe/UT
morex_contig_203512	MLOC_29762	Uncharacterized		XLOC_123248		2.38324	0.00215057	24Fe/UT
morex_contig_243786	MLOC_34411	Aspartic proteinase nepenthesin-1, Nepenthesin-I; extracellular proteinase found in the pitcher fluid of carnivorous plants. Digest prey for nitrogen uptake.	Aegilops tauschii	XLOC_124688		-2.73836	3.83e-05	24Fe/UT
morex_contig_2566919	XLOC_125552	Disease resistance protein RPM1, RPS3, Resistance to Pseudomonas syringae protein 3; Disease resistance (R) protein that specifically recognizes the AvrRpm1 type III effector avirulence protein from Pseudomonas syringae. Resistance proteins guard the plant against pathogens that contain an appropriate avirulence protein via an indirect interaction with this avirulence protein. That triggers a def…	Aegilops tauschii	XLOC_125552		2.91393	0.00397706	24Fe/UT
morex_contig_267210	MLOC_43017	Putative LRR receptor-like serine/threonine-protein kinase	Aegilops tauschii	XLOC_126014		-3.39135	0.00497047	24Fe/UT
morex_contig_276445	MLOC_45136	G-type lectin S-receptor-like serine/threonine-protein kinase, a plasma membrane calmudolin binding pritein; involved in protein N-linked glycosylation.	Setaria italica	XLOC_126221		-2.26218	0.00929093	24Fe/UT
morex_contig_307649	MLOC_47532	Aspartic proteinase nepenthesin-2; Extracellular proteinase found in the pitcher fluid of carnivorous plants. Digest prey for nitrogen uptake.	Aegilops tauschii	XLOC_126963		-2.46986	1.4e-05	24Fe/UT
morex_contig_456277	RBCL, rbcL-1 (EPlHVUG00000010074)	Ribulose-1,5-bisphosphate carboxylase/oxygenase large subunit, (chloroplast), partial; it catalyzes the carboxylation of ribulose-1,5-bisphosphate		XLOC_128217		1.92631	0.000780185	24Fe/UT
morex_contig_51438	MLOC_66355	ABC transporter G family member 5-like	Setaria italica	XLOC_128359		-3.7786	0.000124111	24Fe/UT
chr1	MLOC_34765	MEI2-LIKE PROTEIN 1; A member of mei2-like gene family, predominantly plant-based family of genes encoding RNA binding proteins		XLOC_000015	TCONS_00000044	7.81199	0.00193549	24Zn/24Fe
chr1	XLOC_000024	B hordein		XLOC_000024	TCONS_00000077	7.43284	0.00466387	24Zn/24Fe
chr1	XLOC_000024	B hordein		XLOC_000024	TCONS_00000078	6.964	0.00418535	24Zn/24Fe
chr1	XLOC_000090	Putative leucine-rich repeat receptor-like protein kinase At2g19210-like	Brachypodium distachyon	XLOC_000090	TCONS_00000296	7.17812	0.00676821	24Zn/24Fe
chr1	MLOC_43525	E3 UFM1-protein ligase 1 homolog; human E3 UFM1-protein ligase mediates ufmylation of target proteins such as DDRGK1/C20orf116. The function of ufmylation is unknown. May act as a tumor suppressor by inhibiting cell invasion, blocking NF-kappa-B signaling and increasing stability of CDK5RAP3. Ubiquitin fold modifier 1 (UFM1) and its target UFBP1 protect pancreatic beta cells from ER stress-induce…	Brachypodium distachyon	XLOC_000141	TCONS_00000471	7.93485	0.00136463	24Zn/24Fe
chr1	XLOC_000162	Uncharacterized		XLOC_000162	TCONS_00000544	-6.00774	0.00201336	24Zn/24Fe
chr1	XLOC_000176	Uncharacterized		XLOC_000176	TCONS_00000587	-10.0032	2.36e-05	24Zn/24Fe
chr1	XLOC_000234	Alternative splicing regulator RSZ38; interacts with TaLuc7, TaPrp38, TaTRN-SR, TaTra2, TaRSZBP1, TaU1-70K, TaU2AF65, TaU2AF65a; SR protein.	Triticum aestivum	XLOC_000234	TCONS_00000784	7.39909	0.00466387	24Zn/24Fe
chr1	MLOC_44130	Cullin-1; involved in ubiquitination and subsequent proteasomal degradation of target proteins. Regulator of mitotic processes which plays a role during gametogenesis and embryogenesis. Together with SKP1, RBX1 and a F-box protein, it forms a SCF complex. The functional specificity of this complex depends of the type of F-box protein. SCF(UFO) is implicated in floral organ development. SCF(TIR1) …	Aegilops tauschii	XLOC_000285	TCONS_00000939	9.21979	8.92e-05	24Zn/24Fe
chr1	MLOC_70906	GCN5-related N-acetyltransferase-like; the Gcn5-related N-acetyltransferases are an enormous superfamily of enzymes that are universally distributed in nature and that use acyl-CoAs to acylate their cognate substrates.	Oryza sativa	XLOC_000406	TCONS_00001405	-8.62018	0.000366078	24Zn/24Fe
chr1	MLOC_64658	Uncharacterized protein, Coiled-coil domain-containing protein 25-like	Brachypodium distachyon	XLOC_000452	TCONS_00001571	-9.16419	0.000111755	24Zn/24Fe
chr1	MLOC_11126	Exportin-4-like; Exp4 is an example of a nuclear transport receptor carrying distinct cargoes (TRANSCRIPTION FACTORS) into different directions (The EMBO Journal 2000, 19:4362-4371 ; J Cell Biol 2009, 185:27-34).	Brachypodium distachyon	XLOC_000489	TCONS_00001725	-8.74663	0.000256184	24Zn/24Fe
chr1	MLOC_36476	Tubulin-specific chaperone D, Beta-tubulin cofactor D; Tubulin-folding protein; involved in the first step of the tubulin folding pathway. Modulates microtubule dynamics by capturing GTP-bound beta-tubulin (TUBB). Acts as a GTPase-activating protein (GAP) for ARL2. Its ability to interact with beta tubulin is regulated via its interaction with ARL2. Induces microtubule disruption in absence of AR…	Aegilops tauschii	XLOC_000495	TCONS_00001752	8.39481	0.000513942	24Zn/24Fe
chr1	XLOC_000672	Serine/threonine-protein kinase PBS1, AvrPphB susceptible protein 1; protein kinase required for plant defense mechanism mediated by the disease resistance (R) protein RPS5. In case of infection by Pseudomonas syringae, RPS5 specifically recognizes the avrPphB type III effector avirulence protein and triggers a defense reaction. AvrPphB may trigger RPS5-mediated defense mechanism via the cleavage…	Triticum urartu	XLOC_000672	TCONS_00002423	7.62026	0.00271588	24Zn/24Fe
chr1	MLOC_61783	Putative E3 ubiquitin-protein ligase HERC1; involved in membrane trafficking via some guanine nucleotide exchange factor (GEF) activity and its ability to bind clathrin. Acts as a GEF for Arf and Rab, by exchanging bound GDP for free GTP. Binds phosphatidylinositol 4,5-bisphosphate, which is required for GEF activity. May also act as a E3 ubiquitin-protein ligase which accepts ubiquitin from an E…	Aegilops tauschii	XLOC_000692	TCONS_00002496	5.40955	0.00735175	24Zn/24Fe
chr1	MLOC_56196	DnaJ homolog subfamily C member 7; acts as co-chaperone regulating the molecular chaperones HSP70 and HSP90, act as a recycling chaperone by facilitating the return of chaperone substrates to early stages of chaperoning if further folding is required. Predicted as chlorplast localized protein by PlantLocserver.	Aegilops tauschii	XLOC_000743	TCONS_00002713	5.85182	0.00114352	24Zn/24Fe
chr1	MLOC_56394	U1 SMALL NUCLEAR RIBONUCLEOPROTEIN-70K, U1-70K, U1SNRNP; Involved in splicing	Triticum urartu	XLOC_000747	TCONS_00002736	-8.29181	0.000795144	24Zn/24Fe
chr1	MLOC_43759	Putative protease inhibitor		XLOC_000830	TCONS_00002971	-4.83787	0.00402214	24Zn/24Fe
chr1	MLOC_6575	TOBAMOVIRUS MULTIPLICATION 2A, TOM2A; TOM2A encodes a 280 amino acid putative four-pass transmembrane protein with a C-terminal farnesylation signal, essential for efficient multiplication of tobacco mosaic viruses.	Brachypodium distachyon	XLOC_000857	TCONS_00003062	7.09625	0.00981023	24Zn/24Fe
chr1	MLOC_72809	NUCLEAR FACTOR Y, SUBUNIT C11", NF-YC11		XLOC_000899	TCONS_00003203	5.10947	0.00538737	24Zn/24Fe
chr1	MLOC_67136	Serine/threonine-protein kinase tricorner-like	Brachypodium distachyon	XLOC_000926	TCONS_00003306	-8.49765	0.000513942	24Zn/24Fe
chr1	MLOC_11260	Probable NOT transcription complex subunit VIP2-like; NOT5 family ; NOT1, NOT2, NOT3, NOT4 and NOT5 form a nuclear complex that negatively regulates the basal and activated transcription of many genes	Brachypodium distachyon	XLOC_000932	TCONS_00003326	-5.93397	0.00251754	24Zn/24Fe
chr1	MLOC_58251	Putative GANP protein; participate in DNA replication (PNAS 2001, 98:10279-10283).	Oryza sativa	XLOC_000994	TCONS_00003533	-7.70915	0.00256045	24Zn/24Fe
chr1	MLOC_4800	Coronatine insensitive 1-like protein; required for jasmonate-regulated plant fertility and defense processes, and for coronatine and/or other elicitors perceptions/responses. Seems to not be required for meiosis. Required for the regulation of some genes induced by wounding, but not for all. Component of SCF(COI1) E3 ubiquitin ligase complexes, which may mediate the ubiquitination and subsequent…	Triticum aestivum	XLOC_001016	TCONS_00003610	-8.73312	0.000258616	24Zn/24Fe
chr1	MLOC_10051	cGMP-dependent and protein kinase C) kinase family protein; Involved in protein phosphorylation	Arabidopsis	XLOC_001105	TCONS_00003849	9.14031	0.000125184	24Zn/24Fe
chr1	MLOC_19686	Myosin XI E, XIE; Involved in Golgi localization, actin cytoskeleton organization	Brachypodium distachyon	XLOC_001146	TCONS_00003977	-7.25918	0.00626135	24Zn/24Fe
chr1	MLOC_62384	Beta-galactosidase 8 isoform X2, Beta-Galactosidase 17, BGAL17; involved in carbohydrate metabolic process.	Brachypodium distachyon	XLOC_001149	TCONS_00004012	7.32913	0.00538066	24Zn/24Fe
chr1	MLOC_69619	Dynamin-related protein 5A-like; Microtubule-associated force-producing protein (see Biochem Soc Trans 2010, 38:797-806). This isoform lacks the C-terminal GTPase effector domain.	Brachypodium distachyon	XLOC_001249	TCONS_00004347	9.38407	7.37e-05	24Zn/24Fe
chr1	MLOC_53410	Putative ubiquitin-conjugating enzyme E2 24 (UBC24), PHO2; up-regulated in senescing leaves and maturating seeds, down-regulated by phosphate deprivation, and regulated by microRNA399 (miR399).	Triticum urartu	XLOC_001282	TCONS_00004460	5.7463	0.00393739	24Zn/24Fe
chr1	MLOC_10939	Uncharacterized		XLOC_001342	TCONS_00004625	9.62209	3.93e-05	24Zn/24Fe
chr1	MLOC_53684	Auxin-responsive GH3 family protein, indole-3-acetic acid-amido synthetase GH3.5, JASMONATE RESISTANT 1, JAR1; JAR1 catalyzes the formation of a biologically active jasmonyl-isoleucine (JA-Ile) conjugate. JA-Ile promotes the interaction between JAZ1 and COI1 in the jasmonate signaling pathway. JAR1 localizes to the cytoplasm and is also a phytochrome A signaling component. JAR1 is an auxin-induce…		XLOC_001359	TCONS_00004724	4.09306	0.00992024	24Zn/24Fe
chr1	MLOC_53684	Auxin-responsive GH3 family protein, indole-3-acetic acid-amido synthetase GH3.5, JASMONATE RESISTANT 1, JAR1; JAR1 catalyzes the formation of a biologically active jasmonyl-isoleucine (JA-Ile) conjugate. JA-Ile promotes the interaction between JAZ1 and COI1 in the jasmonate signaling pathway. JAR1 localizes to the cytoplasm and is also a phytochrome A signaling component. JAR1 is an auxin-induce…		XLOC_001359	TCONS_00004726	-9.28025	7.93e-05	24Zn/24Fe
chr1	MLOC_37532	Protein argonaute 4B; probably involved in the RNA silencing pathway. May bind to short RNAs such as microRNAs (miRNAs) or short interfering RNAs (siRNAs), and represses the translation of mRNAs which are complementary to them.	Triticum urartu	XLOC_001415	TCONS_00004895	7.62026	0.00271588	24Zn/24Fe
chr1	MLOC_37532	Protein argonaute 4B; probably involved in the RNA silencing pathway. May bind to short RNAs such as microRNAs (miRNAs) or short interfering RNAs (siRNAs), and represses the translation of mRNAs which are complementary to them.	Triticum urartu	XLOC_001415	TCONS_00004897	7.59067	0.00325322	24Zn/24Fe
chr1	XLOC_001434	Glucan 1,3-beta-glucosidase, Exo-1,3-beta-glucanase 1, Exo-1,3-beta-glucanase A, EXG1; Beta-glucanases participate in the metabolism of beta-glucan, the main structural component of the cell wall. It could also function biosynthetically as a transglycosylase. Successive hydrolysis of beta-D-glucose units from the non-reducing ends of (1->3)-beta-D-glucans, releasing alpha-glucose. The combination…	Aegilops tauschii	XLOC_001434	TCONS_00004949	8.57185	0.000329992	24Zn/24Fe
chr1	MLOC_38832	Similar to CIPK1 interacting protein ECT2; Environmental stimuli, including light, pathogens, hormones, and abiotic stresses, elicit changes in the cytosolic Ca(2+) signatures of plant cells. However, little is known about the molecular mechanisms by which plants sense and transmit the specific cytoplasmic Ca(2+) signal into the nucleus, where gene regulation occurs to respond appropriately to th…	Arabidopsis thaliana	XLOC_001558	TCONS_00005327	8.54124	0.000381318	24Zn/24Fe
chr1	MLOC_10620	Transcriptional regulator ATRX-like protein; involved in chromatin remodelling and DNA methylation (see Nature Genetics 2000, 24:368-371.	Brachypodium distachyon	XLOC_001602	TCONS_00005480	-8.38117	0.000607715	24Zn/24Fe
chr1	MLOC_11968	Uncharacterized		XLOC_001650	TCONS_00005656	7.0535	0.00886598	24Zn/24Fe
chr1	MLOC_10701	Vacuolar Na+/H+ antiporter; Salt Tolerance Conferred by Overexpression of a Vacuolar Na+/H+ Antiport in Arabidopsis (Science 1999, 285:1256-1258). This isoform is likely a chloroplast localized protein predicted by PlantLoc server.	Triticum aestivum	XLOC_001707	TCONS_00005832	-7.33271	0.00580225	24Zn/24Fe
chr1	MLOC_55297	WD repeat-containing protein 26; may be involved in MAPK pathways.	Triticum urartu	XLOC_001741	TCONS_00005938	-7.1817	0.00805497	24Zn/24Fe
chr1	MLOC_21642	Valyl-tRNA synthetase (VALRS); catalyzes ATP + L-valine + tRNA(Val) = AMP + diphosphate + L-valyl-tRNA(Val).	Aegilops tauschii	XLOC_001825	TCONS_00006290	7.0535	0.00981023	24Zn/24Fe
chr1	MLOC_21642	Valyl-tRNA synthetase (VALRS); catalyzes ATP + L-valine + tRNA(Val) = AMP + diphosphate + L-valyl-tRNA(Val).	Aegilops tauschii	XLOC_001825	TCONS_00006293	7.39909	0.00501406	24Zn/24Fe
chr1	MLOC_21642	Valyl-tRNA synthetase (VALRS); catalyzes ATP + L-valine + tRNA(Val) = AMP + diphosphate + L-valyl-tRNA(Val).	Aegilops tauschii	XLOC_001825	TCONS_00006295	-7.59425	0.00325322	24Zn/24Fe
chr1	MLOC_21642	Valyl-tRNA synthetase (VALRS); catalyzes ATP + L-valine + tRNA(Val) = AMP + diphosphate + L-valyl-tRNA(Val).	Aegilops tauschii	XLOC_001825	TCONS_00006296	-7.40267	0.00466387	24Zn/24Fe
chr1	MLOC_14621	Acyl-CoA oxidase 4; Encodes a short-chain acyl-CoA oxidase, which catalyzes the first step of peroxisomal fatty acid beta-oxidation during early, post-germinative growth in oilseed species.	Arabidopsis	XLOC_001930	TCONS_00006680	5.07935	0.00538066	24Zn/24Fe
chr1	MLOC_10856	Dihydrolipoyl dehydrogenase 1, mitochondrial-like; This isoform does not have the mit signal peptide and is likely nuclear/ER localized protein predicted by PlantLoc server. Lipoamide dehydrogenase is a component of the glycine decarboxylase (GDC) or glycine cleavage system as well as of the alpha-ketoacid dehydrogenase complexes. LPD1 is probably the protein most often associated with the glycin…	Brachypodium distachyon	XLOC_001959	TCONS_00006784	8.19296	0.0010123	24Zn/24Fe
chr1	MLOC_44142	U2 snRNP-associated SURP motif-containing protein; involved in DNA damage response, cell cycle progression and promote apoptosis (Mol Cancer Res October 2010, 8:1388).	Brachypodium distachyon	XLOC_001975	TCONS_00006832	5.4154	0.00275786	24Zn/24Fe
chr1	MLOC_44142	Uncharacterized		XLOC_001975	TCONS_00006840	-8.17672	0.000857393	24Zn/24Fe
chr1	MLOC_12923	UDP-Glycosyltransferase superfamily protein; Encodes a protein with sequence similarity to glycosyltransferases that is localized to the golgi apparatus and is involved in pollen tube development.		XLOC_002039	TCONS_00007098	-7.65284	0.00256045	24Zn/24Fe
chr1	MLOC_51141	Agenet domain containing protein; Tudor-like domain present in plant sequences ;Domain in plant sequences with possible chromatin-associated functions. Likely involved in programmed cell death (negatively) and deactivated by metacaspases.	Oryza sativa	XLOC_002080	TCONS_00007239	-4.93306	0.00136463	24Zn/24Fe
chr1	MLOC_75385	GDSL esterase/lipase At1g54790-like, ENOD8 (EARLY NODULIN8) like; involved in lipid metabolism.	Brachypodium distachyon	XLOC_002174	TCONS_00007594	6.87244	0.000106088	24Zn/24Fe
chr1	MLOC_68876	Heteroglycan glucosidase 1, HGL1		XLOC_002186	TCONS_00007669	6.44633	0.000903289	24Zn/24Fe
chr1	XLOC_002240	Retrotransposon protein, putative, Ty1-copia subclass	Oryza sativa	XLOC_002240	TCONS_00007884	-7.56403	0.00325322	24Zn/24Fe
chr1	MLOC_4839	Acylamino-acid-releasing enzyme, Acylaminoacyl-peptidase; this enzyme catalyzes the hydrolysis of the N-terminal peptide bond of an N-acetylated peptide to generate an N-acetylated amino acid and a peptide with a free N-terminus (J Biol Chem 1987, 262:11435-11445). It preferentially cleaves off Ac-Ala, Ac-Met and Ac-Ser. It can be defined as stress-regulated proteins (see PLoS One 2012, 7:e37921).	Triticum urartu	XLOC_002247	TCONS_00007914	-8.67775	0.000258616	24Zn/24Fe
chr1	MLOC_12066	KRR1 family protein; stress response	Oryza brachyantha	XLOC_002302	TCONS_00008138	7.78611	0.00193549	24Zn/24Fe
chr1	MLOC_72504	PHD finger protein ALFIN-LIKE 1; histone-binding component that specifically recognizes H3 tails trimethylated on 'Lys-4' (H3K4me3), which mark transcription start sites of virtually all active genes (Plant J 2009, 58:511-24).	Brachypodium distachyon	XLOC_002314	TCONS_00008210	7.62026	0.00325322	24Zn/24Fe
chr1	XLOC_002350	Uncharacterized		XLOC_002350	TCONS_00008339	-11.1266	1.65e-06	24Zn/24Fe
chr1	XLOC_002358	Ring finger and transmembrane domain-containing protein 2, RING/U-box superfamily protein;	Aegilops tauschii	XLOC_002358	TCONS_00008365	-8.00742	0.0012483	24Zn/24Fe
chr1	MLOC_62418	Very-long-chain (3R)-3-hydroxyacyl-[acyl-carrier protein] dehydratase 2-like isoform X1; responsible for the dehydration step in very long-chain fatty acid (VLCFA) synthesis.	Setaria italica	XLOC_002384	TCONS_00008471	7.64926	0.00306081	24Zn/24Fe
chr1	MLOC_56286	Zip7, At Zinc transporter protein ZIP4; ZIP transporters mediate zinc uptake. May also transport copper and cadmium ions (see J Biol Chem 2003, 278:47644-53; Proc Natl Acad Sci U S A 1998, 95:7220-4). For more details in ZIP in plants look at Plant Biotechnology Reports 2013, 7:309-319; Plant Physiology 2003, 133:126-134; Mol Biol Rep 2009, 36:281-7). This isoform is similar to OsZIP7 (AY275180; …		XLOC_002640	TCONS_00009317	-7.76334	0.00213551	24Zn/24Fe
chr1	MLOC_57642	RING finger protein 44, RNF44, E3 ubiquitin ligase BIG BROTHER-related protein; Arabidopsis RING-finger E3 ligases contribute to the RPM1- and RPS2-mediated hypersensitive response (Plant J 2005, 44:258-70).	Aegilops tauschii	XLOC_002657	TCONS_00009368	-5.41601	0.00735175	24Zn/24Fe
chr1	MLOC_64627	ABC transporter F family member 4-like; ABCF_EF-3 Elongation factor 3 (EF-3) is a cytosolic protein required by fungal ribosomes for in vitro protein synthesis and for in vivo growth.	Brachypodium distachyon	XLOC_002671	TCONS_00009462	7.21738	0.00580225	24Zn/24Fe
chr1	MLOC_20912	Paired amphipathic helix protein Sin3-like 3, SNL3, Transcriptional corepressor Sin3; acts as a transcriptional repressor. Interacts with ERF7 to repress genes in abscisic acid and drought stress responses. The heterodimer represses transcription by tethering SNL3 to DNA (Plant Cell 2005, 17:2384-2396). Loss-of-function mutant (antisense inhibition) leads to abscisic acid hypersensitivity in germ…	Triticum urartu	XLOC_002736	TCONS_00009633	7.09625	0.00886598	24Zn/24Fe
chr1	XLOC_002759	Bifunctional dihydroflavonol 4-reductase/flavanone 4-reductase-like, Dihydrokaempferol 4-reductase, Flavanone 4-reductase; involved in the flavonoid metabolism. May use dihydroquercetin, dihydrokaempferol, eriodictyol, garbanzol (5-deoxydihydrokaempferol), dihydrofisetin (5-deoxydihydroquercetin), naringenin to a low extent (10%), but not 5-deoxynaringenin or butin (5-deoxyeriodictyol) as substra…	Brachypodium distachyon	XLOC_002759	TCONS_00009695	-8.11554	0.00103193	24Zn/24Fe
1H	MLOC_13156	Ubiquitin protein ligase 6; Involved in protein ubiquitination	Brachypodium distachyon	XLOC_007095	TCONS_00014172	-8.49765	0.000448772	24Zn/24Fe
1H	MLOC_66381	Cytochrome P450 86B1-like; a heme binding protein involved in very long chain fatty acids (VLCFA) omega-hydroxylation. Required for the synthesis of saturated VLCFA alpha, omega-bifunctional suberin monomers (see Plant Physiol 2009, 150:1831-43; Plant Physiol 2009, 151:1317-28).	Brachypodium distachyon	XLOC_007157	TCONS_00014393	-4.24622	0.00886598	24Zn/24Fe
1H	XLOC_007161	Putative ubiquitin carboxyl-terminal hydrolase 11, Ubiquitin-specific-processing protease 11; recognizes and hydrolyzes the peptide bond at the C-terminal Gly of ubiquitin. Involved in the processing of poly-ubiquitin precursors as well as that of ubiquitinated proteins.	Triticum urartu	XLOC_007161	TCONS_00014406	-8.29181	0.000795144	24Zn/24Fe
1H	XLOC_007180	Uncharacterized		XLOC_007180	TCONS_00014476	7.56045	0.00325322	24Zn/24Fe
1H	XLOC_007180	Uncharacterized		XLOC_007180	TCONS_00014479	8.32464	0.000723267	24Zn/24Fe
1H	XLOC_007180	Uncharacterized		XLOC_007180	TCONS_00014483	-8.77329	0.000268003	24Zn/24Fe
1H	MLOC_10376	STAUROSPORIN AND TEMPERATURE SENSITIVE 3-LIKE A, STT3A; Encodes an oligosaccharyl transferase involved response to high salt. Mutants are hypersensitive to high salt conditions	Arabidopsis	XLOC_007188	TCONS_00014506	4.76332	0.00984119	24Zn/24Fe
1H	MLOC_63023	Uncharacterized		XLOC_007203	TCONS_00014588	7.17812	0.00735175	24Zn/24Fe
1H	MLOC_63023	Uncharacterized		XLOC_007203	TCONS_00014590	-6.96757	0.00418535	24Zn/24Fe
1H	MLOC_11116	Uncharacterized		XLOC_007249	TCONS_00014748	5.00576	0.00526397	24Zn/24Fe
1H	MLOC_77928	Phosphatidylinositol 3-kinase family protein TOR; related to TOR proteins from yeast and mammals, regulators of cell growth in response to nutrient availability. TOR proteins belong to the family of phosphatidylinositol 3-kinase and are targets of the antiproliferative drug rapamycin. AtTOR binds the yeast FKBP12 protein in the presence of Rapamycin, is involved in embryogenesis and is expressed …	Arabidopsis thaliana	XLOC_007355	TCONS_00015073	9.34028	7.27e-05	24Zn/24Fe
1H	XLOC_007551	Uncharacterized protein with domain DUF1618		XLOC_007551	TCONS_00015627	-7.33271	0.00580225	24Zn/24Fe
1H	XLOC_007566	Proteasome subunit beta type-6, 20S proteasome beta subunit A-1; the proteasome is a multicatalytic proteinase complex which is characterized by its ability to cleave peptides with Arg, Phe, Tyr, Leu, and Glu adjacent to the leaving group at neutral or slightly basic pH. The proteasome has an ATP-dependent proteolytic activity.	Triticum urartu	XLOC_007566	TCONS_00015661	-7.22096	0.00735175	24Zn/24Fe
1H	MLOC_53584	Putative kinase-interacting protein 1, KIP1, Homologe of ueast YBL063W; a Kinesin-related motor protein; required for mitotic spindle assembly, chromosome segregation.	Cenchrus ciliaris	XLOC_008162	TCONS_00016543	9.27665	7.58e-05	24Zn/24Fe
1H	MLOC_53584	Putative kinase-interacting protein 1, KIP1, Homologe of ueast YBL063W; a Kinesin-related motor protein; required for mitotic spindle assembly, chromosome segregation.	Cenchrus ciliaris	XLOC_008162	TCONS_00016550	-7.89054	0.00185523	24Zn/24Fe
1H	MLOC_73532	Uncharacterized		XLOC_008166	TCONS_00016572	-4.83909	0.00940635	24Zn/24Fe
1H	MLOC_11953	GSK-like kinase 1A, protein serine/threonine kinase activity; it has a negative role in the BR signaling pathways (see BMC Plant Biology 2013, 13:64 ). BRs (Brassinosteroids) are steroid hormones belonging to the group of endogenous signals required for plant growth and organogenesis, controlling processes such as Cell Expansion, Vascular Differentiation, Etiolation and Reproductive Development.	Triticum aestivum	XLOC_008167	TCONS_00016577	-9.51157	4.73e-05	24Zn/24Fe
1H	MLOC_80710	Phospholipid-transporting ATPase 3-like, Aminophospholipid ATPase 3, Aminophospholipid flippase 3, Protein IRREGULAR TRICHOME BRANCH 2, ALA3, ITB2; involved in transport of phospholipids. Contributes to transmembrane flipping of lipids. Required for secretory processes during plant development. Requires an interaction with an ALIS protein for activity. Has activity with phosphatidylserine, phosph…	Brachypodium distachyon	XLOC_008202	TCONS_00016691	-8.21611	0.000885475	24Zn/24Fe
1H	MLOC_5918	Uncharacterized		XLOC_008290	TCONS_00017074	-7.89054	0.00165772	24Zn/24Fe
1H	MLOC_14781	Uncharacterized		XLOC_008308	TCONS_00017130	8.3425	0.000631136	24Zn/24Fe
1H	XLOC_008348	Ubiquitin carboxyl-terminal hydrolase 10, UBP10, Deubiquitinating enzyme 10; recognizes and hydrolyzes the peptide bond at the C-terminal Gly of ubiquitin. Involved in the processing of poly-ubiquitin precursors as well as that of ubiquitinated proteins	Aegilops tauschii	XLOC_008348	TCONS_00017242	-8.48158	0.000477839	24Zn/24Fe
1H	MLOC_50796	TATA BINDING PROTEIN 1, TBP1, TFIID-1, TRANSCRIPTION FACTOR IID-1	Arabidopsis	XLOC_008412	TCONS_00017444	-7.89054	0.00161234	24Zn/24Fe
chr2	XLOC_016188	E3 ubiquitin ligase BIG BROTHER-related protein	Triticum urartu	XLOC_016188	TCONS_00026011	4.77288	0.0093376	24Zn/24Fe
chr2	MLOC_11990	Putative glycerol-3-phosphate dehydrogenase; it is also a major contributor of electrons to the electron transport chain in the mitochondria.	Oryza sativa	XLOC_016230	TCONS_00026128	7.70557	0.00256045	24Zn/24Fe
chr2	MLOC_67498	Myb family transcription factor APL; required for phloem identity. Has a dual role both in promoting phloem differentiation and in repressing xylem differentiation during vascular development (Nature 2003, 426:181-186; Plant Cell 2008, 20:1494-1503).	Aegilops tauschii	XLOC_016402	TCONS_00026667	-5.68209	0.00143031	24Zn/24Fe
chr2	MLOC_10635	Uncharacterized		XLOC_016432	TCONS_00026781	-7.25918	0.00580225	24Zn/24Fe
chr2	MLOC_73678	Phospholipase A2 family protein; enzymatically active PLA2 cleaves the sn-2 position of the glycerol backbone of phospholipids. Releases fatty acids from the second carbon group of glycerol.	Arabidopsis thaliana	XLOC_016438	TCONS_00026805	7.83741	0.00201336	24Zn/24Fe
chr2	MLOC_73678	Phospholipase A2 family protein; enzymatically active PLA2 cleaves the sn-2 position of the glycerol backbone of phospholipids. Releases fatty acids from the second carbon group of glycerol.	Arabidopsis thaliana	XLOC_016438	TCONS_00026806	8.23183	0.000885475	24Zn/24Fe
chr2	MLOC_52745	Folate-biopterin transporter 1, chloroplastic-like isoform X2; mediates folate monoglutamate transport involved in tetrahydrofolate biosynthesis. It also mediates transport of antifolates, such as methotrexate and aminopterin (J Biol Chem 2005, 280:38457-38463; J Biol Chem 2010, 285:2867-2875). Tetrahydrofolate (THF)2 and its derivatives (collectively termed folates) are essential cofactors for o…	Setaria italica	XLOC_016552	TCONS_00027241	7.88695	0.00152421	24Zn/24Fe
chr2	XLOC_016620	Endoplasmic reticulum metallopeptidase 1-like, Zn-dependent exopeptidase-like protein; involved in chromosome segregation, meiotic DNA double-strand break formation, meiotic chromosome segregation, multicellular organism reproduction, organ morphogenesis, positive regulation of organelle organization, proteolysis, reciprocal meiotic recombination, regulation of chromosome organization, regulation…	Brachypodium distachyon	XLOC_016620	TCONS_00027534	7.70557	0.00213551	24Zn/24Fe
chr2	XLOC_016620	Endoplasmic reticulum metallopeptidase 1-like, Zn-dependent exopeptidase-like protein; involved in chromosome segregation, meiotic DNA double-strand break formation, meiotic chromosome segregation, multicellular organism reproduction, organ morphogenesis, positive regulation of organelle organization, proteolysis, reciprocal meiotic recombination, regulation of chromosome organization, regulation…	Brachypodium distachyon	XLOC_016620	TCONS_00027535	-9.36155	7.47e-05	24Zn/24Fe
chr2	MLOC_65387	CONVOLUTA, SPIRAL 2, SPR2, TOR1, TORTIFOLIA 1; Encodes a novel, plant-specific microtubule-associated protein that regulates the orientation of cortical microtubules. Involved in microtubule cytoskeleton organization,	Aegilops tauschii	XLOC_016773	TCONS_00028021	-7.33271	0.00580225	24Zn/24Fe
chr2	MLOC_57767	PERQ amino acid-rich with GYF domain-containing protein 2; Involved in response to abscisic acid	Triticum urartu	XLOC_016880	TCONS_00028412	7.43284	0.00466387	24Zn/24Fe
chr2	MLOC_75141	Putative UDP-N-acetylglucosamine--peptide N-acetylglucosaminyltransferase SEC; O-linked N-acetylglucosamine transferase (OGT) that mediates O-glycosylation of capsid protein (CP) of virus in case of infection by Plum pox virus. OGTs catalyze the addition of nucleotide-activated sugars directly onto the polypeptide through O-glycosidic linkage with the hydroxyl of serine or threonine. Probably act…	Triticum urartu	XLOC_016896	TCONS_00028463	8.30655	0.000737145	24Zn/24Fe
chr2	MLOC_59150	RanBP2-type zinc finger protein; ZRANB2 can bind to a ssRNA sequence containing the consensus AGGUAA (see J Mol Biol. 2011 Mar 25;407(2):273-83).	Aegilops tauschii	XLOC_016904	TCONS_00028530	-8.71947	0.000258616	24Zn/24Fe
chr2	MLOC_77651	Acetyl-COA synthetase, ACS; Encodes a plastidic acetyl-coA synthetase. predicted to be a chloroplast/peroxisomal protein. This enzyme plays a role in converting acetate to acetyl-coA in the plastids. It does not appear to be a major contributor to fatty acid biosynthesis based on mutant phenotypes. The enzyme seems to act as a monomer and may play an important role in preventing the toxic accumul…	Arabidopsis	XLOC_016941	TCONS_00028716	4.67548	0.00735175	24Zn/24Fe
chr2	MLOC_61229	Uncharacterized		XLOC_017025	TCONS_00029018	-4.5778	0.00774826	24Zn/24Fe
chr2	MLOC_3594	Uncharacterized		XLOC_017083	TCONS_00029194	-7.56403	0.00325322	24Zn/24Fe
chr2	MLOC_14656	PIP aquaporin isoform ; it is now widely known that most (75–95%) of water transport is mediated by aquaporins. Therefore, the open/close state of AQP and its regulation is essential in maintaining cell water balance and the adjustment of plant–water relations. Because of the integration of AQPs in numerous functions in plant development and adaptations to different living conditions, studies on …		XLOC_017212	TCONS_00029705	6.82712	0.000363986	24Zn/24Fe
chr2	MLOC_14656	PIP aquaporin isoform ; it is now widely known that most (75–95%) of water transport is mediated by aquaporins. Therefore, the open/close state of AQP and its regulation is essential in maintaining cell water balance and the adjustment of plant–water relations. Because of the integration of AQPs in numerous functions in plant development and adaptations to different living conditions, studies on …		XLOC_017212	TCONS_00029708	-4.12154	0.00891593	24Zn/24Fe
chr2	MLOC_51546	Mitogen-activated protein kinase kinase kinase 2, ANP2, Arabidopsis NPK1-related protein kinase 2; involved in cortical microtubules organization and stabilization by regulating the phosphorylation state of microtubule-associated proteins such as MAP65-1 (Plant Cell 2010, 22:755-71).	Triticum urartu	XLOC_017333	TCONS_00030061	-8.23541	0.000885475	24Zn/24Fe
chr2	MLOC_2174	Uncharacterized		XLOC_017340	TCONS_00030079	7.73292	0.00225751	24Zn/24Fe
chr2	MLOC_37255	Glucuronosyltransferase PGSIP8, •Plant glycogenin-like starch initiation protein 8	Brachypodium distachyon	XLOC_017350	TCONS_00030097	-8.25446	0.000773508	24Zn/24Fe
chr2	XLOC_017380	Uncharacterized		XLOC_017380	TCONS_00030232	-7.25918	0.00626135	24Zn/24Fe
chr2	MLOC_58262	Gamma-aminobutyrate transaminase 1; Transaminase that degrades gamma-amino butyric acid (GABA) and uses pyruvate or glyoxylate as amino-group acceptor. Cannot use beta-alanine, ornithine, acetylornithine, serine, glycine, asparagine, glutamine, glutamate, valine, leucine, isoleucine, methionine, phenylalanine, histidine, lysine, arginine, aspartate, threonine, tyrosine, tryptophan, proline, or cy…	Brachypodium distachyon	XLOC_017400	TCONS_00030293	8.3425	0.000690605	24Zn/24Fe
chr2	MLOC_64217	F-box/kelch-repeat protein At5g60570-like isoform 1, Galactose oxidase/kelch repeat superfamily protein. Galactose oxidase (GAO) is a Cu-containing oxidase found only in the genus Fusarium which contains many plant pathogens. It catalyses the oxidation of a terminal galactose residue to the corresponding aldehyde with the production of hydrogen peroxide.	Brachypodium distachyon	XLOC_017450	TCONS_00030505	10.0764	1.69e-05	24Zn/24Fe
chr2	MLOC_57811	Probable 26S proteasome non-ATPase regulatory subunit 7	Brachypodium distachyon	XLOC_017617	TCONS_00031072	7.73292	0.00256045	24Zn/24Fe
chr2	MLOC_10651	UPF0136 membrane protein with unknown function	Aegilops tauschii	XLOC_017658	TCONS_00031251	-8.43225	0.000538725	24Zn/24Fe
chr2	MLOC_77326	E3 ubiquitin ligase BIG BROTHER-related protein (BBR); involved in protein autoubiquitination. It controls organ size in a dosage-dependent manner (see Curr Biol 2006, 16:272-9).	Triticum urartu	XLOC_017681	TCONS_00031310	-8.98194	0.000147561	24Zn/24Fe
chr2	MLOC_77326	E3 ubiquitin ligase BIG BROTHER-related protein (BBR); involved in protein autoubiquitination. It controls organ size in a dosage-dependent manner (see Curr Biol 2006, 16:272-9).	Triticum urartu	XLOC_017681	TCONS_00031311	-9.34387	6.97e-05	24Zn/24Fe
chr2	MLOC_76721	Uncharacterized		XLOC_017703	TCONS_00031374	7.21738	0.00626135	24Zn/24Fe
chr2	MLOC_76721	Uncharacterized		XLOC_017703	TCONS_00031378	-7.1817	0.00676821	24Zn/24Fe
chr2	MLOC_11661	Putative galacturonosyltransferase 10, Glycosyltransferase QUASIMODO1 (GAUT8); involved in pectin and/or xylans biosynthesis in cell walls. Alpha-1-4-D-galacturonosyltransferase involved in homogalacturonan (HGA) synthesis, a class of pectin which plays a role in cell adhesion.	Triticum urartu	XLOC_017717	TCONS_00031433	-8.48158	0.00046286	24Zn/24Fe
chr2	MLOC_14650	Sacsin-like; a specialized type of Zn-finger of 40 to 60 residues that binds two atoms of zinc, Sacsin is a Hsp70 co-chaperone in human (see Hum Mol Genet 2009, 18:1556-65).	Brachypodium distachyon	XLOC_017782	TCONS_00031699	5.01653	0.00159667	24Zn/24Fe
chr2	MLOC_14650	Sacsin-like; a specialized type of Zn-finger of 40 to 60 residues that binds two atoms of zinc, Sacsin is a Hsp70 co-chaperone in human (see Hum Mol Genet 2009, 18:1556-65).	Brachypodium distachyon	XLOC_017782	TCONS_00031701	9.73461	3.05e-05	24Zn/24Fe
chr2	MLOC_57408	Glutathione-regulated potassium-efflux system protein kefC; catalyzes K+/H+ antiport. Inhibited by glutathione through interaction at C-terminal. This isoform has 137 less amino acids at C-terminal compared to the isoform TCONS_00031939.	Aegilops tauschii	XLOC_017853	TCONS_00031940	4.37202	0.00668792	24Zn/24Fe
chr2	MLOC_58838	Uncharacterized		XLOC_017941	TCONS_00032167	-7.50164	0.00403395	24Zn/24Fe
chr2	MLOC_3021	Actin-related protein 2/3 complex subunit 5		XLOC_018178	TCONS_00032939	-7.22096	0.00676821	24Zn/24Fe
chr2	MLOC_18152	Rho GTPase-activating protein 24; is involved in cell polarity, cell morphology and cytoskeletal organization and controls actin remodeling by inactivating Rac downstream of Rho leading to suppress leading edge protrusion and promotes cell retraction to achieve cellular polarity.	Triticum urartu	XLOC_018254	TCONS_00033157	5.98318	0.00201336	24Zn/24Fe
chr2	MLOC_62732	Transformation/transcription domain-associated protein-like isoform X2; an adapter protein, which is found in various multiprotein chromatin complexes with histone acetyltransferase activity (HAT), which gives a specific tag for epigenetic transcription activation.	Setaria italica	XLOC_018274	TCONS_00033216	8.22868	3.48e-06	24Zn/24Fe
chr2	MLOC_17194	Uncharacterized		XLOC_018316	TCONS_00033366	-7.93843	0.00165772	24Zn/24Fe
chr2	MLOC_52084	Dual specificity protein kinase pyk1, Non-receptor tyrosine kinase spore lysis A; Ankyrin repeat containing protein kinase.	Triticum urartu	XLOC_018335	TCONS_00033429	-9.18419	0.000107088	24Zn/24Fe
chr2	MLOC_62152	SPX domain-containing protein 6; Up-regulated during cold stress (Plant Biotechnol J 2009, 7:550-61). Constitutive expression of OsSPX1 were more tolerant to cold stress than were wild-type plants, and showed better seedling survival and reduced cellular electrolyte leakage. In addition, there was decreased total leaf Pi content and accumulation of free proline and sucrose in transgenic tobacco p…	Setaria italica	XLOC_018422	TCONS_00033728	-7.50164	0.00350986	24Zn/24Fe
chr2	MLOC_66674	Protein disulfide isomerase-like 5-4-like, PDIL5-4, PDIL8-1; acts as a protein-folding catalyst that interacts with nascent polypeptides to catalyze the formation, isomerization, and reduction or oxidation of disulfide bonds. May play a role in storage protein biogenesis.	Brachypodium distachyon	XLOC_018458	TCONS_00033854	7.43284	0.00403395	24Zn/24Fe
chr2	MLOC_66674	Protein disulfide isomerase-like 5-4-like, PDIL5-4, PDIL8-1; acts as a protein-folding catalyst that interacts with nascent polypeptides to catalyze the formation, isomerization, and reduction or oxidation of disulfide bonds. May play a role in storage protein biogenesis.	Brachypodium distachyon	XLOC_018458	TCONS_00033858	7.88695	0.00152421	24Zn/24Fe
chr2	MLOC_66218	Uncharacterized		XLOC_018484	TCONS_00033916	-7.09982	0.00981023	24Zn/24Fe
chr2	MLOC_20609	Uncharacterized		XLOC_018571	TCONS_00034178	-7.43642	0.00434145	24Zn/24Fe
chr2	MLOC_54351	Uncharacterized		XLOC_018627	TCONS_00034350	9.1606	0.000104147	24Zn/24Fe
chr2	MLOC_59151	Xanthine/uracil permease family protein, nucleobase-ascorbate transporter 11	Brachypodium distachyon	XLOC_018732	TCONS_00034694	-8.19655	0.000966986	24Zn/24Fe
chr2	MLOC_73713	ClpC1, CLPC HOMOLOGUE 1, CLPC1, DCA1, DE-REGULATED CAO ACCUMULATION 1, HEAT SHOCK PROTEIN 93-V, HSP93-V	Arabidopsis	XLOC_018736	TCONS_00034712	6.34435	0.000319189	24Zn/24Fe
chr2	MLOC_11928	Eukaryotic translation initiation factor 5A1	Triticum aestivum	XLOC_018749	TCONS_00034775	-9.03797	0.000125184	24Zn/24Fe
chr2	MLOC_61753	Probable galactinol--sucrose galactosyltransferase 2-like, Raffinose synthase or seed inhibition protein Sip1; raffinose synthase EC 2.4.1.82 is the key enzyme that channels sucrose into the raffinose oligosaccharide (see	Brachypodium distachyon	XLOC_018767	TCONS_00034844	-7.33271	0.00580225	24Zn/24Fe
chr2	MLOC_4643	Cyclin-dependent kinase G-2 (CDKG-2); cyclins, cyclin-dependent kinases, and a number of other proteins control the progression of plant cell cycle (Plant Mol Biol 2007, 64:349-60). Down-regulated by cytokinin.	Aegilops tauschii	XLOC_018806	TCONS_00035000	-7.89054	0.00161234	24Zn/24Fe
chr2	MLOC_34561	Histone-lysine N-methyltransferase ASHH1; a Histone methyltransferase. The Arabidopsis thaliana SET-domain-containing protein ASHH1/SDG26 interacts with itself and with distinct histone lysine methyltransferases. Furthermore, ASHH1 interacts with two proteins from the heat shock protein 40 kDa (Hsp40/DnaJ) superfamily, thus connecting the epigenetic network with a system sensing external cues (J …	Aegilops tauschii	XLOC_018850	TCONS_00035219	7.17812	0.00676821	24Zn/24Fe
chr2	MLOC_34561	Histone-lysine N-methyltransferase ASHH1; a Histone methyltransferase. The Arabidopsis thaliana SET-domain-containing protein ASHH1/SDG26 interacts with itself and with distinct histone lysine methyltransferases. Furthermore, ASHH1 interacts with two proteins from the heat shock protein 40 kDa (Hsp40/DnaJ) superfamily, thus connecting the epigenetic network with a system sensing external cues (J …	Aegilops tauschii	XLOC_018850	TCONS_00035225	-7.76334	0.00225751	24Zn/24Fe
chr2	MLOC_15705	FAR1-RELATED SEQUENCE 11-like; putative transcription activator involved in regulating light control of development (Science 2007, 318:1302-5).	Brachypodium distachyon	XLOC_018892	TCONS_00035368	7.09625	0.00886598	24Zn/24Fe
chr2	MLOC_13052	U6 snRNA-associated Sm-like protein LSm1-like (LSM1); plays a role in replication-dependent histone mRNA degradation. Binds specifically to the 3'-terminal U-tract of U6 snRNA (Genes Dev 2008, 22:50-65).	Brachypodium distachyon	XLOC_018898	TCONS_00035418	-8.99332	0.000156805	24Zn/24Fe
chr2	MLOC_14483	Galactose oxidase/kelch repeat superfamily protein	Arabidopsis	XLOC_018947	TCONS_00035589	-7.53317	0.00376708	24Zn/24Fe
chr2	MLOC_62861	Sphingoid long-chain bases kinase 1, LCBK1, Sphingosine kinase 1; involved in the production of sphingolipid metabolites (Plant Cell Physiol 2005, 46:375-80). Involved in plant cell signalling; sphingosine kinase1 (SPHK1) encodes an enzyme that phosphorylates sphingosine, phytosphingosine and other sphingoid long-chain bases. The stomata of SPHK1-KD Arabidopsis plants were less sensitive, whereas…	Triticum urartu, Brachypodium distachyon	XLOC_019119	TCONS_00036274	-7.29641	0.00626135	24Zn/24Fe
chr2	MLOC_63233	ELMO domain-containing protein A-like isoform 1; acts as a GTPase-activating protein (GAP) toward guanine nucleotide exchange factors like ARL2, ARL3, ARF1 and ARF6, but not for GTPases outside the Arf family.	Brachypodium distachyon	XLOC_019162	TCONS_00036425	-7.68127	0.00256045	24Zn/24Fe
chr2	MLOC_12134	Peroxisomal 2,4-dienoyl-CoA reductase,DECR, SDRB, Short-chain dehydrogenase-reductase B; Involved in fatty acid beta-oxidation	Aegilops tauschii	XLOC_019196	TCONS_00036604	-7.05707	0.00981023	24Zn/24Fe
chr2	MLOC_56261	ABC transporter C family member 2; vacoular membrane pump for glutathione S-conjugates. Mediates the transport of S-conjugates such as GSH, S-(2,4-dinitrophenyl)-glutathione (DNP-GS), GSSG, cyanidin 3-glucoside-GS (C3G-GS) and metolachlor-GS (MOC-GS), glucuronides such as 17-beta-estradiol 17-(beta-D-glucuronide) (E217betaG), and of the chlorophyll catabolite such as B.napus nonfluorescent chloro…	Aegilops tauschii	XLOC_019278	TCONS_00036893	5.63346	0.000513942	24Zn/24Fe
chr2	MLOC_60063	WEB family protein At5g16730, chloroplastic-like ; with Chromosome segregation ATPases domain Smc, incolced in WRKY53 dependent leaf senescence in Arabidopsis	Setaria italica	XLOC_019358	TCONS_00037180	5.7676	0.00335584	24Zn/24Fe
chr2	MLOC_59469	Vacuolar protein sorting-associated protein 41 (VPS41)-like protein; required for vacuolar assembly and vacuolar traffic.	Triticum urartu	XLOC_019570	TCONS_00037905	-7.43642	0.00434145	24Zn/24Fe
chr2	MLOC_4571	Multiple C2 and transmembrane domain-containing protein 2, Calcium/lipid-binding plant phosphoribosyltransferase family protein, Glutathione peroxidase	Brachypodium distachyo	XLOC_019627	TCONS_00038085	-7.81557	0.00193549	24Zn/24Fe
2HL	MLOC_79979	SAM domain family protein; may involved in chromatin silencing by small RNA, meiotic DNA double-strand break formation, meiotic chromosome segregation, reciprocal meiotic recombination, regulation of chromosome organization, sister chromatid cohesion.	Triticum durum	XLOC_025765	TCONS_00044675	7.59067	0.00306081	24Zn/24Fe
2HL	MLOC_21832	Eukaryotic initiation trnslation factor 4B	Triticum aestivum	XLOC_025817	TCONS_00044822	7.39909	0.00466387	24Zn/24Fe
2HL	MLOC_38553	Uncharacterized		XLOC_026032	TCONS_00045341	6.73283	0.000387806	24Zn/24Fe
2HL	MLOC_36767	D-lactate dehydrogenase [cytochrome], mitochondrial-like; catalyzes the stereospecific oxidation of D-lactate to pyruvate. Predicted for ER localization by PlantLoc server.	Brachypodium distachyon	XLOC_026289	TCONS_00045888	9.25795	8.2e-05	24Zn/24Fe
2HL	MLOC_71624	ATP-dependent chaperone ClpB member; ClpB/Hsp104 molecular chaperone is a protein disaggregating machine (J Struct Biol 2004, 146:99-105).		XLOC_026305	TCONS_00045948	-8.41542	0.000561521	24Zn/24Fe
2HS	XLOC_030412	Putitive miRNA; predicted by findMiRNA programm at http://linux1.softberry.com/berry.phtml?topic=findmirna&group=programs&subgroup=rnastruct dir p-mi_b p-mi_e mi_beg mi_end pre-miRNA miRNA + 6 125 33 53 uagcgugugugugggauucccgugggcugagcugaccacuuguaugcauggcccaaaguguagugugauggcagcuuaaaaaaacauuugccauuuguccacuuauuaguaccacgucgc ugagcugaccacuuguaugca + 75 194 80 100 ggcagcuuaaaaaaacauuugccauuuguccacuuau…		XLOC_030412	TCONS_00050696	-8.3984	0.000631136	24Zn/24Fe
2HS	MLOC_12053	Putative MYST-like histone acetyltransferase 1; histone acetyltransferase which may be involved in transcriptional activation (The Plant Journal 2007, 52:615-626; BMC Genomics 2013, 14:57).	Aegilops tauschii	XLOC_030425	TCONS_00050748	4.79196	0.00624431	24Zn/24Fe
2HS	MLOC_12053	Putative MYST-like histone acetyltransferase 1; histone acetyltransferase which may be involved in transcriptional activation (The Plant Journal 2007, 52:615-626; BMC Genomics 2013, 14:57).	Aegilops tauschii	XLOC_030425	TCONS_00050751	-7.62384	0.00271588	24Zn/24Fe
2HS	MLOC_36966	Putative 6-phosphogluconolactonase 2; hydrolysis of 6-phosphogluconolactone to 6-phosphogluconate. Involved in carbohydrate degradation, pentose phosphate pathway; D-ribulose 5-phosphate from D-glucose 6-phosphate (oxidative stage).	Aegilops tauschii	XLOC_030757	TCONS_00051734	-7.36811	0.00501406	24Zn/24Fe
2HS	MLOC_50786	Probable AMP deaminase-like, EMBRYONIC FACTOR 1; AMP deaminase plays a critical role in energy metabolism. Essential for the transition from zygote to embryo (Plant J 2005, 42:743-56). Catalyzes AMP + H2O = IMP + NH3.	Brachypodium distachyon	XLOC_030898	TCONS_00051974	7.88063	3.8e-05	24Zn/24Fe
2HS	MLOC_67781	Nuclear transcription factor Y subunit A-5, NFYA5; stimulates the transcription of various genes by recognizing and binding to a CCAAT motif in promoters. Involved in the blue light (BL) and abscisic acid (ABA) signaling pathways positively (Plant Physiol 2007, 143:1590-600). Involved in response to water deprivation.	Aegilops tauschii	XLOC_030964	TCONS_00052210	-8.13622	0.00103193	24Zn/24Fe
2HS	XLOC_031033	Mediator of RNA polymerase II transcription subunit 33A-like	Setaria italica	XLOC_031033	TCONS_00052451	8.78284	0.000239198	24Zn/24Fe
2HS	XLOC_031033	Mediator of RNA polymerase II transcription subunit 33A-like	Setaria italica	XLOC_031033	TCONS_00052453	-9.56595	4.41e-05	24Zn/24Fe
2HS	MLOC_79442	zinc finger A20 and AN1 domain-containing stress-associated protein 9 isoform X2	Brachypodium distachyon	XLOC_031042	TCONS_00052478	7.46582	0.00434145	24Zn/24Fe
2HS	MLOC_80628	Chaperone DnaJ-domain superfamily protein, involved in protein folding		XLOC_031081	TCONS_00052566	-7.50164	0.00350986	24Zn/24Fe
chr3	MLOC_68482	SIN3, SIN3-LIKE 3, SNL3; involved in negative regulation of transcription through histone deacetylase complex	Aegilops tauschii	XLOC_034085	TCONS_00055753	-8.93549	0.000184802	24Zn/24Fe
chr3	MLOC_57815	LRR and NB-ARC domains-containing disease resistance protein	Aegilops tauschii	XLOC_034159	TCONS_00055971	7.36453	0.00580225	24Zn/24Fe
chr3	MLOC_26110	GTP-binding protein YPTM2; protein transport. Probably involved in vesicular traffic.	Triticum urartu	XLOC_034215	TCONS_00056139	8.09097	0.00107962	24Zn/24Fe
chr3	MLOC_38101	Myosin-Vb; may be involved in vesicular trafficking via its association with the CART complex. The CART complex is necessary for efficient transferrin receptor recycling but not for EGFR degradation. Required in a complex with RAB11A and RAB11FIP2 for the transport of NPC1L1 to the plasma membrane. Together with RAB11A participates in CFTR trafficking to the plasma membrane and TF (transferrin) r…	Triticum urartu	XLOC_034219	TCONS_00056150	-9.47144	4.73e-05	24Zn/24Fe
chr3	MLOC_82052	Putative CENP-E-like kinetochore protein; the kinetochore is the protein structure on chromatids where the spindle fibers attach during cell division to pull sister chromatids apart.	Aegilops uniaristata, Triticum monococcum	XLOC_034330	TCONS_00056595	8.13263	0.0010123	24Zn/24Fe
chr3	MLOC_69206	TBP-associated factor 15B; Involved in regulation of transcriptin	Brachypodium distachyon	XLOC_034345	TCONS_00056637	7.46582	0.00376708	24Zn/24Fe
chr3	MLOC_17823	Uncharacterized		XLOC_034472	TCONS_00057063	7.75976	0.00225751	24Zn/24Fe
chr3	MLOC_17823	Uncharacterized		XLOC_034472	TCONS_00057069	-7.65284	0.00271588	24Zn/24Fe
chr3	MLOC_55827	DEAD-box ATP-dependent RNA helicase 14; ATP-dependent RNA helicase involved nonsense-mediated mRNA decay and ribosome biogenesis through rRNA processing (see Science 2002, 295:694-7).	Triticum urartu	XLOC_034476	TCONS_00057088	-8.43225	0.000585718	24Zn/24Fe
chr3	MLOC_64350	Uncharacterized		XLOC_034504	TCONS_00057214	7.59067	0.00289516	24Zn/24Fe
chr3	XLOC_034540	DNA-directed RNA polymerase I subunit RPA2; DNA-dependent RNA polymerase catalyzes the transcription of DNA into RNA using the four ribonucleoside triphosphates as substrates. Second largest core component of RNA polymerase I which synthesizes ribosomal RNA precursors. Proposed to contribute to the polymerase catalytic activity and forms the polymerase active center together with the largest subu…	Aegilops tauschii	XLOC_034540	TCONS_00057403	9.73461	3.57e-05	24Zn/24Fe
chr3	MLOC_11787	FAD/NAD(P)-binding oxidoreductase, cytochrome-b5 reductase activity	Arabidopsis	XLOC_034545	TCONS_00057411	-7.89054	0.00165772	24Zn/24Fe
chr3	MLOC_75868	Uncharacterized		XLOC_034606	TCONS_00057673	7.75976	0.00213551	24Zn/24Fe
chr3	XLOC_034628	Uncharacterized		XLOC_034628	TCONS_00057736	-4.46829	0.00434145	24Zn/24Fe
chr3	MLOC_4846	Histone-lysine N-methyltransferases		XLOC_034635	TCONS_00057759	7.29283	0.00538066	24Zn/24Fe
chr3	MLOC_55189	Uncharacterized		XLOC_034649	TCONS_00057823	-9.66891	3.57e-05	24Zn/24Fe
chr3	MLOC_7183	Coatomer subunit beta-2-like isoform 1, Beta'-coat protein 2; The coatomer is a cytosolic protein complex that binds to dilysine motifs and reversibly associates with Golgi non-clathrin-coated vesicles, which further mediate biosynthetic protein transport from the ER, via the Golgi up to the trans Golgi network. Coatomer complex is required for budding from Golgi membranes, and is essential for t…	Brachypodium distachyon	XLOC_034651	TCONS_00057854	11.0433	1.65e-06	24Zn/24Fe
chr3	MLOC_70512	Casein kinase 1 like 2, CKL2	Arabidopsis	XLOC_034722	TCONS_00058112	-9.66179	3.57e-05	24Zn/24Fe
chr3	MLOC_20377	Autophagy-related protein 7, Ubiquitin-like modifier-activating enzyme atg7; E1-like activating enzyme involved in the 2 ubiquitin-like systems required for cytoplasm to vacuole transport (Cvt) and autophagy. Activates ATG12 for its conjugation with ATG5 and ATG8 for its conjugation with phosphatidylethanolamine. Both systems are needed for the ATG8 association to Cvt vesicles and autophagosomes.…	Triticum urartu	XLOC_034764	TCONS_00058267	-9.52732	4.81e-05	24Zn/24Fe
chr3	MLOC_15120	Zinc finger-like	Oryza sativa	XLOC_034808	TCONS_00058481	8.61659	0.000366078	24Zn/24Fe
chr3	MLOC_50935	Ubiquitin-conjugating enzyme E2 5A; E2 conjugating enzyme that associates with the E3 ubiquitin-protein ligase EL5 to mediates ubiquitination of target proteins (Plant J 2002, 30:447-55).	Brachypodium distachyon	XLOC_034868	TCONS_00058714	8.09097	0.0011253	24Zn/24Fe
chr3	MLOC_56928	Beta-1,3-glucuronyltransferase 2, UDP-glucuronosyltransferase S, Galactosylgalactosylxylosylprotein 3-beta-glucuronosyltransferase 2, B3GAT2; involved in glycosylation of proteins. Involved in the biosynthesis of L2/HNK-1 carbohydrate epitope on both glycolipids and glycoproteins.	Aegilops tauschii	XLOC_034888	TCONS_00058809	7.29283	0.00626135	24Zn/24Fe
chr3	MLOC_68963	Histone H1; histones H1 are necessary for the condensation of nucleosome chains into higher-order structures.	Aegilops tauschii	XLOC_034924	TCONS_00058957	-8.09455	0.00117959	24Zn/24Fe
chr3	MLOC_28020	Uncharacterized		XLOC_034972	TCONS_00059151	7.78611	0.00201336	24Zn/24Fe
chr3	MLOC_54589	Guanine nucleotide-binding protein subunit beta-like protein A-like, Receptor of activated protein kinase C 1; in yeast it is located at the head of the 40S ribosomal subunit in the vicinity of the mRNA exit channel, it serves as a scaffold protein that can recruit other proteins to the ribosome. Involved in the negative regulation of translation of a specific subset of proteins.	Brachypodium distachyon	XLOC_034994	TCONS_00059285	4.59905	0.00582096	24Zn/24Fe
chr3	MLOC_12783	Ubiquitin-specific protease 12, UBP12	Arabidopsis	XLOC_035099	TCONS_00059615	7.78611	0.00201336	24Zn/24Fe
chr3	MLOC_37273	MOR1-like protein (MICROTUBULE ORGANIZATION 1); it a shorter version covering the C-terminal region of the MOR1. MOR1 is essential in cytokinesis (see Nature 2001, 411:610-3:Nat Cell Biol 2002, 4:711-4).	Brachypodium distachyon	XLOC_035178	TCONS_00059899	5.14245	0.00520852	24Zn/24Fe
chr3	MLOC_12432	RNA polymerase II C-terminal domain phosphatase-like 2-like; transcription and mRNA processing are regulated by phosphorylation and dephosphorylation of the C-terminal domain (CTD) of RNA polymerase II, which consists of tandem repeats of a Y(1)S(2)P(3)T(4)S(5)P(6)S(7) heptapeptide. Previous studies showed that members of the plant CTD phosphatase-like (CPL) protein family differentially regulate…	Brachypodium distachyon	XLOC_035281	TCONS_00060222	7.88695	0.00165772	24Zn/24Fe
chr3	MLOC_57395	Sn1-specific diacylglycerol lipase alpha (Dagla); catalyzes the hydrolysis of diacylglycerol (DAG) to 2-arachidonoyl-glycerol (2-AG), the most abundant endocannabinoid in tissues.	Aegilops tauschii	XLOC_035371	TCONS_00060576	5.24288	0.00103193	24Zn/24Fe
chr3	MLOC_57395	Sn1-specific diacylglycerol lipase alpha (Dagla); catalyzes the hydrolysis of diacylglycerol (DAG) to 2-arachidonoyl-glycerol (2-AG), the most abundant endocannabinoid in tissues. This isoform is a chloroplast localized protein predicted by PlantLoc server.	Aegilops tauschii	XLOC_035371	TCONS_00060588	-9.71088	3.72e-05	24Zn/24Fe
chr3	MLOC_21291	Uncharacterized		XLOC_035439	TCONS_00060870	7.21738	0.00676821	24Zn/24Fe
chr3	MLOC_54055	Homeobox protein LUMINIDEPENDENS-like; seems to play a role in the regulation of flowering time in the autonomous flowering pathway by repressing FLOWERING LOCUS C expression (Plant J, 1999, 18:195-203). Mutant plants show late flowering phenotype (Plant Cell, 1994, 6:75-83).	Brachypodium distachyon	XLOC_035536	TCONS_00061214	5.29689	0.00700053	24Zn/24Fe
chr3	MLOC_56361	Bifunctional purine biosynthesis protein purH, Phosphoribosylaminoimidazolecarboxamide formyltransferase; catalyzes 10-formyltetrahydrofolate + 5-amino-1-(5-phospho-D-ribosyl)imidazole-4-carboxamide = tetrahydrofolate + 5-formamido-1-(5-phospho-D-ribosyl)imidazole-4-carboxamide.	Triticum urartu	XLOC_035545	TCONS_00061240	7.29283	0.00580225	24Zn/24Fe
chr3	XLOC_035643	Carbon catabolite-derepressing protein kinase, RKIN1, SnRK1-type protein kinase, sucrose non-fermenting 1-related protein kinase; essential for release from glucose repression. A cDNA, cRKIN1, encods a putative homologue of the yeast (Saccharomyces cerevisiae) SNF1-encoded protein-serine/threonine kinase (PNAS October 1, 1991 vol. 88 no. 19 8602-8605 ). glucose repression: Catabolite repression w…	Aegilops tauschii	XLOC_035643	TCONS_00061589	5.37082	0.00089491	24Zn/24Fe
chr3	XLOC_035643	Carbon catabolite-derepressing protein kinase, RKIN1, SnRK1-type protein kinase, sucrose non-fermenting 1-related protein kinase; essential for release from glucose repression. A cDNA, cRKIN1, encods a putative homologue of the yeast (Saccharomyces cerevisiae) SNF1-encoded protein-serine/threonine kinase (PNAS October 1, 1991 vol. 88 no. 19 8602-8605 ). glucose repression: Catabolite repression w…	Aegilops tauschii	XLOC_035643	TCONS_00061591	-10.5263	5.74e-06	24Zn/24Fe
chr3	XLOC_035691	E3 ubiquitin-protein ligase RGLG1-like; E3 ubiquitin-protein ligase that mediates the formation of 'Lys-63'-linked multiubiquitin chains. Regulates apical dominance by acting on the auxin transport proteins abundance. Lys-63-linked multiubiquitin chains play important roles in signal transduction in yeast and in mammals, but the functions for this type of chain in plants remain to be defined. The…	Brachypodium distachyon	XLOC_035691	TCONS_00061740	5.97734	0.000477839	24Zn/24Fe
chr3	MLOC_64435	Putative disease resistance protein RGA4; disease resistance protein. Resistance proteins guard the plant against pathogens that contain an appropriate avirulence protein via a direct or indirect interaction with this avirulence protein. That triggers a defense system which restricts the pathogen growth.	Aegilops tauschii	XLOC_035741	TCONS_00061925	7.81199	0.00176441	24Zn/24Fe
chr3	MLOC_53617	E3 SUMO-protein ligase SIZ1; probable zinc binding SUMO E3 ligase that may regulate Pi starvation responses through protein sumoylation in nucleus.	Triticum urartu	XLOC_035765	TCONS_00062010	-4.3824	0.00501406	24Zn/24Fe
chr3	MLOC_57410	Telomere-binding protein 1,TBP1; binds the telomeric double-stranded 5'TTTAGGG-3' repeat and regulates telomere length and structure. Involved in telomer maintainance (Plant Cell 2007, 19:1770-1781).	Aegilops tauschii	XLOC_035770	TCONS_00062033	9.239	8.06e-05	24Zn/24Fe
chr3	MLOC_60718	AP-3 complex subunit beta-2, Adapter-related protein complex 3 subunit beta-2, Beta-3B-adaptin, Clathrin assembly protein complex 3 beta-2 large chain; Subunit of non-clathrin- and clathrin-associated adaptor protein complex 3 (AP-3) that plays a role in protein sorting in the late-Golgi/trans-Golgi network (TGN) and/or endosomes. The AP complexes mediate both the recruitment of clathrin to membr…	Aegilops tauschii	XLOC_035773	TCONS_00062061	7.2556	0.00626135	24Zn/24Fe
chr3	MLOC_75815	Uncharacterized		XLOC_035776	TCONS_00062085	7.2556	0.00580225	24Zn/24Fe
chr3	MLOC_36509	Plasma membrane Na+/H+ antiporter; overexpression of a plasma membrane Na+/H+ antiporter gene improves salt tolerance in Arabidopsis thaliana.accumulated less Na+ in the xylem transpirational stream and in the shoot (see Nat Biotechnol 2003, 21:81-5; The Plant Cell 2002, 14:465-477). Biochemical studies suggest that Na H exchangers in the plasma membrane of plant cells contribute to cellular sodi…	Triticum durum	XLOC_035821	TCONS_00062244	7.93485	0.00165772	24Zn/24Fe
chr3	MLOC_15155	BASIC PROLINE-RICH PROTEIN 1, BPP1; Encodes a microtubule-associated protein		XLOC_035921	TCONS_00062642	4.80786	0.0063833	24Zn/24Fe
chr3	MLOC_66800	Protein phosphatase 2C 3	Brachypodium distachyon	XLOC_035962	TCONS_00062795	7.83741	0.00165772	24Zn/24Fe
chr3	MLOC_4555	Putative chromatin-remodeling complex ATPase chain; possesses intrinsic ATP-dependent nucleosome-remodeling activity. Constitutes the catalytic subunit of several complexes capable of forming ordered nucleosome arrays on chromatin in vitro. Belongs to the SNF2/RAD54 helicase family. ISWI subfamily.	Aegilops tauschii	XLOC_035965	TCONS_00062806	7.8624	0.00165772	24Zn/24Fe
chr3	MLOC_57378	Peptidase family M48 family protein	Arabidopsis	XLOC_035997	TCONS_00062924	-7.22096	0.00735175	24Zn/24Fe
chr3	MLOC_58430	TBP-ASSOCIATED FACTOR 5, involved in splicing	Brachypodium distachyon	XLOC_036083	TCONS_00063282	-7.25918	0.00676821	24Zn/24Fe
chr3	MLOC_19510	Uncharacterized		XLOC_036116	TCONS_00063415	5.3822	0.00780876	24Zn/24Fe
chr3	MLOC_9934	Ubiquitin-conjugating enzyme E2 2, UBC2; accepts the ubiquitin from the E1 complex and catalyzes its covalent attachment to other proteins. Involved in UV protection and histone H2B ubiquitination (see Curr Genet 1997, 32:309-14; Plant Physiol 2005, 139:1597-611; Plant Mol Biol 1996, 31:493-505).	Aegilops tauschii	XLOC_036120	TCONS_00063424	-8.59051	0.000366078	24Zn/24Fe
chr3	MLOC_72568	Uncharacterized		XLOC_036154	TCONS_00063534	-8.0297	0.00136463	24Zn/24Fe
chr3	MLOC_59869	Thioredoxin-related transmembrane protein 2 homolog	Brachypodium distachyon	XLOC_036162	TCONS_00063561	7.0535	0.00981023	24Zn/24Fe
chr3	MLOC_69476	DSPTP1, DUAL SPECIFICITY PROTEIN PHOSPHATASE 1; involved in dephosphorylation	Brachypodium distachyon	XLOC_036216	TCONS_00063834	7.00944	0.00418535	24Zn/24Fe
chr3	MLOC_58975	VHS domain-containing protein At3g16270-like; involved in intracellular protein transport.	Brachypodium distachyon	XLOC_036270	TCONS_00064029	-9.60357	3.92e-05	24Zn/24Fe
chr3	MLOC_14395	E1 C-Terminal related 1, ECR1; Encodes a subunit of a RUB-activating enzyme analogous to the E1 ubiquitin-activating enzyme. ECR1 functions as a heterodimer with AXR1 to activate RUB, a ubiquitin-related protein.	Brachypodium distachyon	XLOC_036282	TCONS_00064057	7.83741	0.00193549	24Zn/24Fe
chr3	MLOC_8413	Isopenicillin N epimerase; catalyzes the reversible isomerization between isopenicillin N and penicillin N. Needs pyridoxal phosphate as cofactor.	Triticum urartu	XLOC_036289	TCONS_00064080	-4.98829	0.00635713	24Zn/24Fe
chr3	MLOC_54580	Protein argonaute 4A; probably involved in the RNA silencing pathway. May bind to short RNAs such as microRNAs (miRNAs) or short interfering RNAs (siRNAs), and represses the translation of mRNAs which are complementary to them	Triticum urartu	XLOC_036365	TCONS_00064382	-11.1598	1.65e-06	24Zn/24Fe
chr3	MLOC_54580	Protein argonaute 4A; probably involved in the RNA silencing pathway. May bind to short RNAs such as microRNAs (miRNAs) or short interfering RNAs (siRNAs), and represses the translation of mRNAs which are complementary to them	Triticum urartu	XLOC_036365	TCONS_00064386	10.9933	2.04e-06	24Zn/24Fe
chr3	MLOC_52139	Shaggy-related protein kinase alpha-like, ASK-alpha, ASK1; Arabidopsis thaliana SHAGGY-related protein kinases (AtSK11 and 12) function in perianth and gynoecium development(Plant J 2000, 21:419-29). Stress-induced GSK3 ALPHA regulates the redox stress response by phosphorylating glucose-6-phosphate dehydrogenase in Arabidopsis (Plant Cell 2012, 24:3380-92). Glc-6-phosphate dehydrogenase (G6PD; E…	Brachypodium distachyon	XLOC_036373	TCONS_00064424	-8.87524	0.000213553	24Zn/24Fe
chr3	MLOC_57038	LisH domain and HEAT repeat-containing-like protein, unknown	Aegilops tauschii	XLOC_036388	TCONS_00064468	8.49406	0.00046286	24Zn/24Fe
chr3	MLOC_12102	LEUNIG, Transcriptional corepressor LEUNIG-like; Arabidopsis thaliana corepressor LEUNIG, a member of the GroTLE transcription corepressor family, regulates the expression of multiple targets in vivo. LEUNIG has a role in the regulation of genes involved in a number of different physiological processes including disease resistance, DNA damage response, and cell signaling. Transcription corepresso…	Brachypodium distachyon	XLOC_036413	TCONS_00064573	6.05422	0.00197766	24Zn/24Fe
chr3	MLOC_11172	YIPF1 homolog; required for fusion of ER-derived vesicles with the Golgi during ER-to-Golgi protein transport, probably by mediating correct membrane localization of ypt1 in yeast.	Brachypodium distachyon	XLOC_036429	TCONS_00064631	7.39909	0.00466387	24Zn/24Fe
chr3	MLOC_72378	Small subunit processome component 20-like protein, UTP20; involved in 18S pre-rRNA processing. Associates with U3 snoRNA in human (Biochim Biophys Acta 2007, 1773:863-8).	Triticum urartu	XLOC_036439	TCONS_00064664	-8.00742	0.00143305	24Zn/24Fe
chr3	MLOC_59852	Symplekin-like; symplekin and multiple other polyadenylation factors participate in 3 -end maturation of histone mRNAs (Genes Dev 2005, 19: 2583-2592). It also participates in transcription initiation and termination by RNA polymerase II (Nature 2010, 467,729-733).	Brachypodium distachyon	XLOC_036557	TCONS_00065091	-10.2837	1.24e-05	24Zn/24Fe
chr3	MLOC_13069	Ubiquitin specific protease 13	Triticum urartu	XLOC_036731	TCONS_00065914	-8.3984	0.000561521	24Zn/24Fe
chr3	MLOC_68719	Eukaryotic translation initiation factor 3 subunit L-like	Setaria italica	XLOC_036778	TCONS_00066115	4.89401	0.00628505	24Zn/24Fe
chr3	MLOC_62897	Rp1-like protein; involved in defence response. Disease resistance protein.	Brachypodium distachyon	XLOC_036782	TCONS_00066139	7.88695	0.00161234	24Zn/24Fe
chr3	MLOC_62897	Rp1-like protein; involved in defence response. Disease resistance protein.	Brachypodium distachyon	XLOC_036782	TCONS_00066143	-8.94724	0.000155726	24Zn/24Fe
chr3	MLOC_64654	3-hydroxyacyl-CoA dehydrogenase family protein; involved in golgi vesicle transport, fatty acid metabolic process	Arabidopsis	XLOC_036800	TCONS_00066204	7.00944	0.00351616	24Zn/24Fe
chr3	MLOC_61338	Glycerophosphodiester phosphodiesterase GDE1-like isoform 2; involved in a Pi stress-induced phospholipid degradation pathway in cluster roots (see Plant Physiol 2011, 156:1131-48). Likely involved in anandamide biosynthesis (see J Biol Chem. 2008 Apr 4;283(14):9341-9.	Brachypodium distachyon	XLOC_036819	TCONS_00066279	-9.02694	0.00014692	24Zn/24Fe
chr3	MLOC_74010	60S ribosomal protein L24	Aegilops tauschii	XLOC_036820	TCONS_00066285	5.20622	0.0054065	24Zn/24Fe
chr3	MLOC_67313	Polypyrimidine tract-binding protein-3-like protein (PTB3); plays a role in pre-mRNA splicing. Binds to the polypyrimidine tract of introns. May promote the binding of U2 snRNP to pre-mRNA. Polypyrimidine tract binding protein (PTB) is known to silence the splicing of many alternative exons. Polypyrimidine tract binding protein (PTB) is an abundant, widely expressed, nuclear RNA binding protein. …	Aegilops tauschii	XLOC_036879	TCONS_00066518	8.55663	0.000448772	24Zn/24Fe
chr3	MLOC_59941	Multidrug resistance associated protein MRP2, ABC transporter C family member 3; as an ATP-binding cassette transporter MRP2 (ABCC2) accepts a diverse range of substrates, including glutathione, glucuronide, and sulfate conjugates of many endo- and xenobiotics. MRP2 generally performs excretory or protective roles (J Pharmacol Exp Ther 2002, 302:407-15). Involved in vacuolar sequstration amd degr…	Triticum aestivum, Triticum urartu	XLOC_036937	TCONS_00066700	-9.16419	0.000111755	24Zn/24Fe
chr3	MLOC_12525	Ankyrin repeat-containing protein At3g12360-like, INCREASED TOLERANCE TO NACL, ITN1; e.g., ANKYRIN REPEAT-CONTAINING PROTEIN 2A is an essential molecular chaperone for peroxisomal membrane-bound ASCORBATE PEROXIDASE3 in Arabidopsis (The Plant Cell 2010, 22:811-831).	Brachypodium distachyon	XLOC_036967	TCONS_00066796	-7.93843	0.00143305	24Zn/24Fe
chr3	MLOC_3773	Root UV-B sensitive 6	Arabidopsis	XLOC_037038	TCONS_00067062	7.88695	0.00165772	24Zn/24Fe
chr3	MLOC_3773	Root UV-B sensitive 6	Arabidopsis	XLOC_037038	TCONS_00067064	-8.07326	0.00107962	24Zn/24Fe
chr3	XLOC_037050	Glycogenin-1, GYG1; self-glucosylates, via an inter-subunit mechanism, to form an oligosaccharide primer that serves as substrate for glycogen synthase. Catalyzes UDP-alpha-D-glucose + glycogenin = UDP + alpha-D-glucosylglycogenin. Glycogen is the analogue of starch, a glucose polymer in plants, and is sometimes referred to as animal starch, having a similar structure to amylopectin but more exte…	Triticum urartu	XLOC_037050	TCONS_00067098	-9.07058	0.000137763	24Zn/24Fe
chr3	MLOC_61073	Glucosidase 1, Mannosyl-oligosaccharide glucosidase, Glycoprotein-processing glucosidase I; cleaves the distal alpha 1,2-linked glucose residue from the Glc3Man9GlcNAc2 oligosaccharide precursor.	Triticum urartu	XLOC_037112	TCONS_00067327	-7.70915	0.00241947	24Zn/24Fe
chr3	MLOC_44326	Uncharacterized		XLOC_037140	TCONS_00067424	-7.81557	0.00201336	24Zn/24Fe
chr3	MLOC_55208	F_Box memer protein; a large family of plant domains, with several hundred members in Arabidopsis thaliana. Most examples are found C-terminal to an F-box (pfam00646), a 60 amino acid motif involved in ubiquitination of target proteins to mark them for degradation. Two-hybid experiments support the idea that most members are interchangeable F-box subunits of SCF E3 complexes. Some members have tw…		XLOC_037193	TCONS_00067600	5.48862	0.00624431	24Zn/24Fe
chr3	MLOC_55208	F_Box memer protein; a large family of plant domains, with several hundred members in Arabidopsis thaliana. Most examples are found C-terminal to an F-box (pfam00646), a 60 amino acid motif involved in ubiquitination of target proteins to mark them for degradation. Two-hybid experiments support the idea that most members are interchangeable F-box subunits of SCF E3 complexes. Some members have tw…		XLOC_037193	TCONS_00067601	9.58504	4.15e-05	24Zn/24Fe
chr3	MLOC_14397	Uncharacterized; Cysteine-rich receptor-like protein; May involved in cytoskeleton.		XLOC_037346	TCONS_00068082	9.56996	4.41e-05	24Zn/24Fe
3HL	XLOC_042786	Zinc-metallopeptidase, peroxisomal, PXM16; peptidase that might be involved in pathogen or wound response. Not required for peroxisome biogenesis, indole-3-butyric acid (IBA) metabolism, fatty acid beta-oxidation or degradation of glyoxylate cycle enzymes during seedling development.	Triticum urartu	XLOC_042786	TCONS_00073706	4.53786	0.00607845	24Zn/24Fe
3HL	MLOC_68060	Putative non-green plastid inner envelope membrane protein	Oryza sativa	XLOC_042810	TCONS_00073852	9.04533	0.000122439	24Zn/24Fe
3HL	CPL1	CTD-phosphatase-like protein, phosphatase activity, dephosphorylation; the repetitive C-terminal domain (CTD) of the largest RNA polymerase II subunit plays a critical role in the regulation of gene expression. The activity of the CTD is dependent on its state of phosphorylation. A variety of CTD kinases act on RNA polymerase II at specific steps in the transcription cycle and preferentially phos…		XLOC_042812	TCONS_00073863	9.57752	4.67e-05	24Zn/24Fe
3HL	MLOC_63385	HASTY 1-like; HASTY1 (the Arabidopsis ortholog of exportin 5/MSN5) is a nucleocytoplasmic transporter involved in the nuclear export of microRNAs (miRNAs). Required for several miRNAs accumulation. Specifically required for miR156 accumulation which targets SQUAMOSA PROMOTER BINDING PROTEIN-LIKE 3, SPL4 and SPL5 transcription factors. Involved in plant development through its role in miRNAs proce…	Brachypodium distachyon	XLOC_042841	TCONS_00073947	8.54124	0.000402546	24Zn/24Fe
3HL	MLOC_68987	Glutamate carboxypeptidase 2-like isoform 2, AMP1, ALTERED MERISTEM PROGRAM 1, AMP1, ATAMP1, CONSTITUTIVE MORPHOGENESIS 2, COP2, HAUPTLING, HPT, MFO1, MULTIFOLIA, PRIMORDIA TIMING, PT, FOLH1; hydrolase folate in human. AUXIN RESPONSE FACTOR (ARF)-mediated signaling conveys positional information during embryonic and postembryonic organogenesis and mutations in MONOPTEROS (MP/ARF5) result in sever…	Brachypodium distachyon	XLOC_042947	TCONS_00074291	-8.25446	0.000857393	24Zn/24Fe
3HL	MLOC_60676	GOLGI MUTANT 8, GOM8, RHD3, ROOT HAIR DEFECTIVE 3; see Genes Dev. 1997 Mar 15;11(6):799-811. The RHD1 gene product appears to be necessary for proper initiation of root hairs, whereas the RHD2, RHD3, and RHD4 gene products are required for normal hair elongation(Plant Cell. 1990 Mar;2(3):235-243).	Arabidopsis thaliana	XLOC_043407	TCONS_00075315	-7.7365	0.00201336	24Zn/24Fe
3HL	MLOC_60676	GOLGI MUTANT 8, GOM8, RHD3, ROOT HAIR DEFECTIVE 3; see Genes Dev. 1997 Mar 15;11(6):799-811. The RHD1 gene product appears to be necessary for proper initiation of root hairs, whereas the RHD2, RHD3, and RHD4 gene products are required for normal hair elongation(Plant Cell. 1990 Mar;2(3):235-243).	Arabidopsis thaliana	XLOC_043407	TCONS_00075316	-7.15095	0.000156805	24Zn/24Fe
3HL	MLOC_60676	GOLGI MUTANT 8, GOM8, RHD3, ROOT HAIR DEFECTIVE 3; see Genes Dev. 1997 Mar 15;11(6):799-811. The RHD1 gene product appears to be necessary for proper initiation of root hairs, whereas the RHD2, RHD3, and RHD4 gene products are required for normal hair elongation(Plant Cell. 1990 Mar;2(3):235-243).	Arabidopsis thaliana	XLOC_043407	TCONS_00075319	-9.81076	2.92e-05	24Zn/24Fe
3HL	MLOC_62116	Splicing factor U2af small subunit A, U2 auxiliary factor 35 kDa subunit A, U2 small nuclear ribonucleoprotein auxiliary factor small subunit A, U2 snRNP auxiliary factor small subunit A, Zinc finger CCCH domain-containing protein 60, U2AF35A; necessary for the splicing of pre-mRNA.	Aegilops tauschii	XLOC_043465	TCONS_00075497	-7.62384	0.00306081	24Zn/24Fe
3HL	MLOC_12514	Uncharacterized		XLOC_043515	TCONS_00075708	4.73013	0.00772469	24Zn/24Fe
3HL	MLOC_68907	Auxin response factor 4, ARF4, ARF2; auxin response factors (ARFs) are transcriptional factors that binds specifically to the DNA sequence 5'-TGTCTC-3' found in the auxin-responsive promoter elements (AuxREs). See Mol Biol Evol 2013, 30:45-56 for ARF family.	Aegilops tauschii	XLOC_043520	TCONS_00075731	-7.89054	0.00165772	24Zn/24Fe
3HL	MLOC_68021	Glycoside hydrolase family 2 protein; Involved in carbohydrate metabolic process	Arabidopsis	XLOC_043532	TCONS_00075763	7.52959	0.00350986	24Zn/24Fe
3HL	MLOC_71860	Polyglutamine-binding protein 1, PQBP-1; unknown function. It is believed to play a role in processing and transporting RNA, a chemical cousin of DNA that serves as the genetic blueprint for the production of proteins.	Triticum urartu	XLOC_043685	TCONS_00076199	-6.96757	0.00420559	24Zn/24Fe
3HL	XLOC_043890	Uncharacterized		XLOC_043890	TCONS_00076550	-7.89054	0.00165772	24Zn/24Fe
3HS	MLOC_58055	Nodal modulator 3; may antagonize Nodal signaling, nodals are signaling factors of the transforming growth factor- (TGF) superfamily with a key role in vertebrate development (The EMBO Journal 2004, 23:3041-3050).	Aegilops tauschii	XLOC_047828	TCONS_00080526	10.0923	2.03e-05	24Zn/24Fe
3HS	MLOC_40022	ERI1 exoribonuclease 2-like; RNA exonuclease that binds to the 3'-end of histone mRNAs and degrades them, suggesting that it plays an essential role in histone mRNA decay after replication. A 2' and 3'-hydroxyl groups at the last nucleotide of the histone 3'-end is required for efficient degradation of RNA substrates. Also able to degrade the 3'-overhangs of short interfering RNAs (siRNAs) in vit…	Brachypodium distachyon	XLOC_048184	TCONS_00081580	-7.7365	0.00201336	24Zn/24Fe
3HS	XLOC_048502	Uncharacterized		XLOC_048502	TCONS_00082405	-7.36811	0.00538066	24Zn/24Fe
3HS	XLOC_048523	IAA-alanine resistance protein 1, IAR1; most indole-3-acetic acid (IAA) in higher plants is conjugated to amino acids, sugars, or peptides, and these conjugates are implicated in regulating the concentration of the free hormone. iar1 has been identified as an Arabidopsis mutant that is resistant to the inhibitory effects of several IAA-amino acid conjugates (on root growth) but remains sensitive …	Triticum urartu	XLOC_048523	TCONS_00082459	-7.53317	0.00376708	24Zn/24Fe
3HS	MLOC_51537	Histone-lysine N-methyltransferase EZ3; polycomb group (PcG) protein. Catalytic subunit of some PcG multiprotein complex, which methylates 'Lys-27' of histone H3, leading to transcriptional repression of the affected target genes.	Triticum urartu	XLOC_048565	TCONS_00082558	7.64926	0.00306081	24Zn/24Fe
chr4	MLOC_71157	E3 ubiquitin-protein ligase RBBP6; E3 ubiquitin-protein ligase which promotes ubiquitination of YBX1, leading to its degradation by the proteasome By similarity. May play a role as a scaffold protein to promote the assembly of the p53/TP53-MDM2 complex, resulting in increase of MDM2-mediated ubiquitination and degradation of p53/TP53; may function as negative regulator of p53/TP53, leading to bot…	Triticum urartu	XLOC_051431	TCONS_00085521	8.06967	0.0011253	24Zn/24Fe
chr4	MLOC_71157	E3 ubiquitin-protein ligase RBBP6; E3 ubiquitin-protein ligase which promotes ubiquitination of YBX1, leading to its degradation by the proteasome By similarity. May play a role as a scaffold protein to promote the assembly of the p53/TP53-MDM2 complex, resulting in increase of MDM2-mediated ubiquitination and degradation of p53/TP53; may function as negative regulator of p53/TP53, leading to bot…	Triticum urartu	XLOC_051431	TCONS_00085525	8.02611	0.0012483	24Zn/24Fe
chr4	MLOC_5817	Phosphatidylinositol 4-kinase alpha-like; acts on phosphatidylinositol (PtdIns) in the first committed step in the production of the second messenger inositol-1,4,5,-trisphosphate.	Brachypodium distachyon	XLOC_051544	TCONS_00085880	8.3425	0.000631136	24Zn/24Fe
chr4	MLOC_62030	Phosphoglucomutase, cytoplasmic-like; this enzyme participates in both the breakdown and synthesis of glucose. Catalyzes Alpha-D-glucose 1-phosphate = alpha-D-glucose 6-phosphate. Binds 1 magnesium ion per subunit.	Brachypodium distachyon	XLOC_051549	TCONS_00085911	-11.3444	1.15e-06	24Zn/24Fe
chr4	MLOC_62030	Phosphoglucomutase, cytoplasmic-like; this enzyme participates in both the breakdown and synthesis of glucose. Catalyzes Alpha-D-glucose 1-phosphate = alpha-D-glucose 6-phosphate. Binds 1 magnesium ion per subunit.	Brachypodium distachyon	XLOC_051549	TCONS_00085912	-9.71776	3.05e-05	24Zn/24Fe
chr4	MLOC_13554	Translational activator GCN1; Acts as a translation activator that mediates translational control and perform an EF3-related function on the ribosome by regulating GCN2 protein kinase (EIF2AK1-4) activity in human	Brachypodium distachyon	XLOC_051584	TCONS_00086021	9.83898	2.92e-05	24Zn/24Fe
chr4	MLOC_13554	Translational activator GCN1; Acts as a translation activator that mediates translational control and perform an EF3-related function on the ribosome by regulating GCN2 protein kinase (EIF2AK1-4) activity in human	Brachypodium distachyon	XLOC_051584	TCONS_00086022	-5.14452	0.00161234	24Zn/24Fe
chr4	XLOC_051623	AMSH-like ubiquitin thiolesterase 3, Deubiquitinating enzyme AMSH3; Zinc metalloprotease that cleaves 'Lys-48'- and 'Lys-63'-linked polyubiquitin chains, but is not implicated in protein degradation by the 26S proteasome, deneddylation, or desumoylation. Required for intracellular trafficking (e.g. trafficking from the Golgi to the vacuole and the vacuolar trafficking of endocytosed cargo), endoc…	Triticum urartu	XLOC_051623	TCONS_00086163	6.4725	0.00270281	24Zn/24Fe
chr4	XLOC_051623	AMSH-like ubiquitin thiolesterase 3, Deubiquitinating enzyme AMSH3; Zinc metalloprotease that cleaves 'Lys-48'- and 'Lys-63'-linked polyubiquitin chains, but is not implicated in protein degradation by the 26S proteasome, deneddylation, or desumoylation. Required for intracellular trafficking (e.g. trafficking from the Golgi to the vacuole and the vacuolar trafficking of endocytosed cargo), endoc…	Triticum urartu	XLOC_051623	TCONS_00086163	6.4725	0.000861223	24Zn/24Fe
chr4	MLOC_64661	Golgi nucleotide sugar transporter 1; Encodes a Golgi-localized GDP-mannose transporter. It can transport ADP-glucose in vitro.	Brachypodium distachyon	XLOC_051624	TCONS_00086177	7.13777	0.00805497	24Zn/24Fe
chr4	MLOC_16606	Pyruvate kinase; predicted to be cytoplasmic.	Triticum urartu	XLOC_051711	TCONS_00086538	-8.31013	0.000723267	24Zn/24Fe
chr4	MLOC_3982	Aberrant pollen transmission1; The maize aberrant pollen transmission 1 gene is a SABRE/KIP homolog required for pollen tube growth (Genetics 2006, 172:1251-61). The APT1 protein is homologous to SABRE and KIP, Arabidopsis proteins of unknown function involved in the elongation of root cortex cells and pollen tubes, respectively. Subcellular localization analysis demonstrates that APT1 colocalize…	Zea mays	XLOC_051803	TCONS_00086858	-4.45906	0.00886598	24Zn/24Fe
chr4	MLOC_5307	Mitogen-activated protein kinase kinase kinase YODA-like; brassinosteroid-regulated GSK3/Shaggy-like kinases phosphorylate MKK4 (mitogen-activated protein (MAP) kinase kinases), which control stomata development in Arabidopsis thaliana. This reduces MKK4 activity against its substrate MPK6 (mitogen-activated protein 6) [see J Biol Chem. 2013 Mar 15;288(11):7519-27). Arabidopsis MKK4 mediates osmo…	Setaria italica	XLOC_051844	TCONS_00086970	9.49206	5.77e-05	24Zn/24Fe
chr4	MLOC_52203	DNA helicase INO80 complex-1-like protein; DNA helicase and probable main scaffold component of the INO80 complex which remodels chromatin by shifting nucleosomes and is involved in DNA repair. Positive regulator of homologous recombination, but not an essential component of homologous recombination. Not involved in the illegitimate repair pathway (see Mol Cell 2004, 16:479-85). This isoform and …	Aegilops tauschii	XLOC_051899	TCONS_00087139	-9.29871	8.34e-05	24Zn/24Fe
chr4	MLOC_74241	Uncharacterized		XLOC_051941	TCONS_00087272	4.77288	0.00681952	24Zn/24Fe
chr4	XLOC_052031	Uncharacterized		XLOC_052031	TCONS_00087562	9.66532	3.72e-05	24Zn/24Fe
chr4	MLOC_59435	Vacuolar protein-sorting-associated protein 37 homolog 1-like isoform X4; component of the ESCRT-I complex (endosomal sorting complex required for transport I), a regulator of vesicular trafficking process. Required for the sorting of endocytic ubiquitinated cargos into multivesicular bodies (MVBs)[Trends Plant Sci 2006, 11:115-23).	Setaria italica	XLOC_052087	TCONS_00087789	5.04117	0.00547646	24Zn/24Fe
chr4	MLOC_59435	Vacuolar protein-sorting-associated protein 37 homolog 1-like isoform X4; component of the ESCRT-I complex (endosomal sorting complex required for transport I), a regulator of vesicular trafficking process. Required for the sorting of endocytic ubiquitinated cargos into multivesicular bodies (MVBs)[Trends Plant Sci 2006, 11:115-23).	Setaria italica	XLOC_052087	TCONS_00087798	-8.98194	0.000161279	24Zn/24Fe
chr4	MLOC_4801	Inositol 1,3,4-trisphosphate 5/6-kinase family protein; involved in stress response	Oryza sativa	XLOC_052240	TCONS_00088285	5.4154	0.00234494	24Zn/24Fe
chr4	MLOC_37498	Nucleotidyltransferase domain containing protein, poly(A) RNA polymerase cid14-like isoform X2	Oryza sativa, Setaria italica	XLOC_052262	TCONS_00088350	7.67769	0.00256045	24Zn/24Fe
chr4	MLOC_63231	Metal transporter Nramp3/4-like; tonoplast localized predicted by PlatLoc server.	Brachypodium distachyon	XLOC_052269	TCONS_00088389	-7.68127	0.00271588	24Zn/24Fe
chr4	MLOC_5787	Glycosyltransferase QUASIMODO1, GAUT8; Alpha-1-4-D-galacturonosyltransferase involved in homogalacturonan (HGA) synthesis, a class of pectin which plays a role in cell adhesion (Planta 2005, 222:613-622).	Aegilops tauschii	XLOC_052272	TCONS_00088392	-9.11293	0.000125184	24Zn/24Fe
chr4	MLOC_55964	Transcription factor bHLH135-like, Protein ACTIVATION-TAGGED BRI1 SUPPRESSOR 1, BS1, EN67, PRE3, TMO7; atypical bHLH transcription factor required for MONOPTEROS-dependent root initiation in embryo. Promotes the correct definition of the hypophysis cell division plane. Transcriptionally controlled by MONOPTEROS. Probably unable to bind DNA. BHLH135 moves from its site of synthesis in pro-embryos …	Brachypodium distachyon	XLOC_052409	TCONS_00088892	7.9111	0.00165772	24Zn/24Fe
chr4	XLOC_052491	Peroxidase 5-like; removal of H2O2, oxidation of toxic reductants, biosynthesis and degradation of lignin, suberization, auxin catabolism, response to environmental stresses such as wounding, pathogen attack and oxidative stress. These functions might be dependent on each isozyme/isoform in each plant tissue.	Brachypodium distachyon	XLOC_052491	TCONS_00089185	7.13777	0.00735175	24Zn/24Fe
chr4	XLOC_052523	Putitive miRNA, Similar to Oryza sativa miR1869; predicted by findMiRNA programm at http://linux1.softberry.com/berry.phtml?topic=findmirna&group=programs&subgroup=rnastruct dir p-mi_b p-mi_e mi_beg mi_end pre-miRNA miRNA + 665 784 676 696 agaacaauaggcaugggaggcaucacaaaaacucaaaccaaagccuccucuagcguuagacgaggaaugagggcuuuagccuucaaucauguucccguguccacuguucuuaggcccucu caugggaggcaucacaaaaac similar to Oryza…		XLOC_052523	TCONS_00089304	-8.41542	0.000607715	24Zn/24Fe
chr4	MLOC_70289	Phosphatidylinositol-glycan biosynthesis class F protein-like isoform X2, PIGF; involved in GPI-anchor biosynthesis through the transfer of ethanolamine phosphate to the third mannose of GPI. Participates in glycolipid biosynthesis; glycosylphosphatidylinositol-anchor biosynthesis. Many eukaryotic cell surface proteins are anchored to the membrane via glycosylphosphatidylinositol (GPI). GPI is sy…	Setaria italica	XLOC_052539	TCONS_00089345	-3.42626	0.005939	24Zn/24Fe
chr4	MLOC_36962	Ribophorin I; Ribophorin I acts as a substrate-specific facilitator of N-glycosylation. The mammalian oligosaccharyltransferase (OST) complex is composed of about eight subunits and mediates the N-glycosylation of nascent polypeptide chains entering the endoplasmic reticulum (ER). The conserved STT3 subunit of eukaryotic OST complexes has been identified as its catalytic centre, yet although many…		XLOC_052545	TCONS_00089368	8.28823	0.000737145	24Zn/24Fe
chr4	MLOC_36962	Ribophorin I; Ribophorin I acts as a substrate-specific facilitator of N-glycosylation. The mammalian oligosaccharyltransferase (OST) complex is composed of about eight subunits and mediates the N-glycosylation of nascent polypeptide chains entering the endoplasmic reticulum (ER). The conserved STT3 subunit of eukaryotic OST complexes has been identified as its catalytic centre, yet although many…		XLOC_052545	TCONS_00089371	-8.25446	0.000773508	24Zn/24Fe
chr4	MLOC_10090	Putative disease resistance protein RGA1; a member of disease resistance NB-LRR family, resistance proteins guard the plant against pathogens that contain an appropriate avirulence protein via a direct or indirect interaction with this avirulence protein. That triggers a defense system which restricts the pathogen growth (see Plant J 2003, 36:867-82).	Aegilops tauschii	XLOC_052695	TCONS_00089917	-7.70915	0.00256045	24Zn/24Fe
chr4	MLOC_72417	Myosin heavy chain, non-muscle; may required for cytokinesis.	Setaria italica	XLOC_052698	TCONS_00089923	7.29283	0.00538066	24Zn/24Fe
chr4	MLOC_72417	Myosin heavy chain, non-muscle; may required for cytokinesis.	Setaria italica	XLOC_052698	TCONS_00089925	5.3822	0.00827318	24Zn/24Fe
chr4	MLOC_72417	Myosin heavy chain, non-muscle; may required for cytokinesis.	Setaria italica	XLOC_052698	TCONS_00089926	-8.11554	0.00103193	24Zn/24Fe
chr4	MLOC_71939	Chlorophyll(ide) b reductase NOL, chloroplastic; Participation of chlorophyll b reductase in the initial step of the degradation of light-harvesting chlorophyll a/b-protein complexes in Arabidopsis (J Biol Chem 2009, 284:17449-56). Although seeds are a sink organ, chlorophyll synthesis and degradation occurs during embryogenesis and in a manner similar to that observed in photosynthetic leaves. S…		XLOC_052709	TCONS_00089950	-7.1817	0.00735175	24Zn/24Fe
chr4	MLOC_43072	Translocon at the outer membrane of chloroplasts 64-III, Involved in protein transport.	Brachypodium distachyon	XLOC_052766	TCONS_00090207	-7.50164	0.00376708	24Zn/24Fe
chr4	MLOC_78825	DEAD-box ATP-dependent RNA helicase 21; ATP-dependent RNA helicase involved in mRNA splicing. May destabilize the U1/5'-splice site duplex to permit an effective competition for the 5'-splice site by the U6 snRNA, resulting in the switch between U1 and U6 at the 5'-splice site. May also act to unwind the U4/U6 base-pairing interaction in the U4/U6/U5 snRNP, facilitating the first covalent step of…	Triticum urartu	XLOC_052770	TCONS_00090234	8.83426	0.000218832	24Zn/24Fe
chr4	MLOC_14296	Protein-protein interaction regulator family protein	Arabidopsis	XLOC_052776	TCONS_00090256	-7.841	0.00185523	24Zn/24Fe
chr4	MLOC_63917	Metalloendopeptidase / zinc ion binding protein	Arabidopsis thaliana	XLOC_052849	TCONS_00090551	8.04806	0.00130668	24Zn/24Fe
chr4	XLOC_052884	Retrotransposon protein, putative	Oryza sativa	XLOC_052884	TCONS_00090665	-8.27326	0.000823026	24Zn/24Fe
chr4	MLOC_14189	Na+/H+ antiporter precursor; ion exchangers NHX1 and NHX2 mediate active potassium uptake into vacuoles to regulate cell turgor and stomatal function in Arabidopsis (see Plant Cell 2012, 24:1127-42), Quantification of vacuolar pH and intravacuolar K(+) concentrations indicates that nhx1 nhx2 mutant vacuoles were more acidic and accumulated only 30% of the wild-type K(+) concentration (see Plant C…	Triticum aestivum	XLOC_052939	TCONS_00090934	7.0693	0.000218832	24Zn/24Fe
chr4	XLOC_052943	Uncharacterized		XLOC_052943	TCONS_00090947	8.84683	0.000210862	24Zn/24Fe
chr4	XLOC_053017	RING/FYVE/PHD zinc finger superfamily protein; may involved in protein targeting to vacuole, vesicle-mediated transport.	Arabidopsis thaliana	XLOC_053017	TCONS_00091224	-8.54483	0.000402546	24Zn/24Fe
chr4	MLOC_60274	LHW, LONESOME HIGHWAY; Encodes a nuclear-localized transcriptional activator with weak sequence similarity to basic helix-loop-helix(bHLH)-domain proteins.		XLOC_053116	TCONS_00091591	-5.59419	0.00501406	24Zn/24Fe
chr4	MLOC_70853	CAS1 domain-containing protein 1-like, O-acetyltransferase Cas1p-like; Cas1p is a membrane protein necessary for the O-acetylation of the Cryptococcus neoformans capsular polysaccharide (Molecular Microbiology 2001, 42,453-467).	Brachypodium distachyon	XLOC_053166	TCONS_00091769	7.09625	0.00805497	24Zn/24Fe
chr4	MLOC_36662	GDP-L-galactose phosphorylase 1-like; catalyses one of the steps in the ascorbate biosynthetic pathway by converting GDP-l-galactose to l-galactose 1-P (see The Plant Journal 2007, 52:673-689).	Brachypodium distachyon	XLOC_053176	TCONS_00091813	-6.55475	0.00064424	24Zn/24Fe
chr4	MLOC_66511	UDP-glucuronic acid decarboxylase 1, UXS1; catalyzes the NAD-dependent decarboxylation of UDP-glucuronic acid to UDP-xylose. Necessary for the biosynthesis of the core tetrasaccharide in glycosaminoglycan biosynthesis (Plant Physiol 2002, 130:2188-98). In woody crop plants, the oligosaccharide components of the cell wall are essential for important traits such as bioenergy content, growth, and st…	Triticum urartu	XLOC_053292	TCONS_00092195	9.85151	2.81e-05	24Zn/24Fe
chr4	MLOC_70283	PCBP (poly(C) binding proteins)_like_KH, KH domain-containing protein; cytrosolic iron regulates the activity of the microRNA pathway through Poly(C)-Binding Protein 2 (see Cell Metab 2012, 15: 895-904; Science 2008, 320:1207-10; FEBS Journal 2008, 275:2712-2726; THE JOURNAL OF BIOLOGICAL CHEMISTRY 2007, 283:28757-28766,).	Aegilops tauschii	XLOC_053331	TCONS_00092353	-9.69703	3.72e-05	24Zn/24Fe
chr4	MLOC_10030	MYB related protein, TSL-kinase interacting protein 1-like; the heterologous expression of the Chrysanthemum R2R3-MYB transcription factor CmMYB1 alters lignin composition and represses flavonoid synthesis in Arabidopsis thaliana (PLoS One 2013, 8:e65680). Likely involved in chromatin remodeling (see Plant Physiol 2004, 134:1488-99). An Arabidopsis SIN3-LIKE1 (SNL1) with telomere-binding protein …	Leymus chinensis, Brachypodium distachyon	XLOC_053384	TCONS_00092578	-7.43642	0.00403395	24Zn/24Fe
chr4	MLOC_59190	EDR1, ENHANCED DISEASE RESISTANCE 1	Brachypodium distachyon	XLOC_053515	TCONS_00093068	7.00944	0.00339892	24Zn/24Fe
chr4	MLOC_65608	F-box/kelch-repeat protein SKIP11; component of SCF(ASK-cullin-F-box) E3 ubiquitin ligase complexes, which may mediate the ubiquitination and subsequent proteasomal degradation of target proteins.	Triticum urartu	XLOC_053559	TCONS_00093202	9.68645	3.57e-05	24Zn/24Fe
chr4	MLOC_62041	Polyphosphoinositide phosphatase, Phosphatidylinositol 3,5-bisphosphate 5-phosphatase, SAC domain-containing protein 3; the PI(3,5)P2 regulatory complex regulates both the synthesis and turnover of phosphatidylinositol 3,5-bisphosphate (PtdIns(3,5)P2). In vitro, hydrolyzes all three D5-phosphorylated polyphosphoinositide substrates in the order PtdIns(4,5)P2 > PtdIns(3,5)P2 > PtdIns(3,4,5)P3. Pla…	Triticum urartu	XLOC_053571	TCONS_00093227	7.17812	0.00805497	24Zn/24Fe
chr4	MLOC_70290	MLo1 protein; may be involved in modulation of pathogen defense and leaf cell death. Activity seems to be regulated by Ca2+-dependent calmodulin binding and seems not to require heterotrimeric G proteins.	Triticum aestivum	XLOC_053677	TCONS_00093572	-8.13622	0.000885475	24Zn/24Fe
chr4	MLOC_53267	Uncharacterized		XLOC_053745	TCONS_00093793	7.2556	0.00676821	24Zn/24Fe
chr4	MLOC_58892	Putative kinesin-related protein; involved in Cell division and chromosome partitioning	Oryza sativa	XLOC_053781	TCONS_00093949	-5.36101	0.00173553	24Zn/24Fe
chr4	MLOC_60426	Putative mediator of RNA polymerase II transcription subunit 12; component of the Mediator complex, a coactivator involved in the regulated transcription of nearly all RNA polymerase II-dependent genes. Mediator functions as a bridge to convey information from gene-specific regulatory proteins to the basal RNA polymerase II transcription machinery. Mediator is recruited to promoters by direct int…	Triticum urartu	XLOC_053788	TCONS_00093974	4.38042	0.00580225	24Zn/24Fe
4HL	MLOC_38100	CCR4-NOT transcription complex subunit 1-like; scaffolding component of the CCR4-NOT complex which is one of the major cellular mRNA deadenylases and is linked to various cellular processes including bulk mRNA degradation, miRNA-mediated repression, translational repression during translational initiation and general transcription regulation.	Brachypodium distachyon	XLOC_058690	TCONS_00099027	10.643	4.39e-06	24Zn/24Fe
4HL	MLOC_38100	CCR4-NOT transcription complex subunit 1-like; scaffolding component of the CCR4-NOT complex which is one of the major cellular mRNA deadenylases and is linked to various cellular processes including bulk mRNA degradation, miRNA-mediated repression, translational repression during translational initiation and general transcription regulation.	Brachypodium distachyon	XLOC_058690	TCONS_00099030	-6.40475	8.58e-05	24Zn/24Fe
4HL	MLOC_75859	Maestro heat-like repeat-containing protein family member 1; ARM repeat superfamily protein may involved in protein glycosylation.	Setaria italica, AT2G36810	XLOC_058721	TCONS_00099147	7.17812	0.00735175	24Zn/24Fe
4HL	MLOC_18524	Coronatine-insensitive protein 1-like; required for jasmonate-regulated plant fertility and defense processes, for the regulation of some genes induced by wounding. It is a component of SCF(COI1) E3 ubiquitin ligase complexes, which may mediate the ubiquitination and subsequent proteasomal degradation of target proteins (probably including the ribulose bisphosphate carboxylase small chain 1B RBCS…	Brachypodium distachyon	XLOC_058725	TCONS_00099164	6.39251	0.000903289	24Zn/24Fe
4HL	MLOC_64479	HEAT repeat-containing 7A-like protein; likely involved in Fe-S cluster formation positively (J Biochem 2003, 134:211-7).	Aegilops tauschii	XLOC_059166	TCONS_00100153	-8.19655	0.000966986	24Zn/24Fe
4HL	MLOC_69040	Histone-lysine N-methyltransferase EZ3-like; polycomb group (PcG) protein. Catalytic subunit of some PcG multiprotein complex, which methylates 'Lys-27' of histone H3, leading to transcriptional repression of the affected target genes. PcG proteins are not required to initiate repression, but to maintain it during later stages of development (see Plant Physiol 2002, 128:1332-45).	Brachypodium distachyon	XLOC_059212	TCONS_00100347	4.93223	0.0085529	24Zn/24Fe
4HL	MLOC_36687	Fumarate hydratase 2 (FUM2), chloroplastic; this isoform codes for the last 176 of 494 and has no chl. signal peptide. catalyzes the reversible hydration/dehydration of fumarate to malate. The chl/mit version involved in Tricarboxylic Acid Cycle and cytosolic one participates in the metabolism of amino acids and fumarate.	Triticum urartu	XLOC_059223	TCONS_00100390	8.15303	0.000885475	24Zn/24Fe
4HL	XLOC_059322	Kinesin light chain-like; kinesin is a microtubule-associated force-producing protein that may play a role in organelle transport. The light chain may function in coupling of cargo to the heavy chain or in the modulation of its ATPase activity.	Brachypodium distachyon	XLOC_059322	TCONS_00100706	-7.43642	0.00434145	24Zn/24Fe
4HL	XLOC_063242	Uncharacterized, Mitochondrial		XLOC_063242	TCONS_00105053	-7.09982	0.00981023	24Zn/24Fe
4HS	XLOC_063272	ENTH/VHS family protein, regulation of nuclear pre-mRNA domain-containing protein 2, RPRD2; RNA polymerase II (RNAP II) C-terminal domain (CTD) phosphorylation is important for various transcription-related processes. Here, we identify by affinity purification and mass spectrometry three previously uncharacterized human CTD-interaction domain (CID)-containing proteins, RPRD1A, RPRD1B and RPRD2, w…	Setaria italica	XLOC_063272	TCONS_00105087	-8.83785	0.000210862	24Zn/24Fe
4HS	MLOC_51948	MAM3, Metal transporter CNNM4, ACDP4 (a member of Ancient Conserved Domain Protein family), KIAA1592; CNNM4 interacts with the metal ion chaperone COX11 (mitochodrial inner membrane localized "Copper chaperones for cytochrome c oxidase assembly homolog 11") (Mol Pain 2005, 1:15). Recently, mutations in the cyclin M2 (CNNM2) gene were identified to be causative for severe hypomagnesemia (Am J Hum …	Medicago truncatula	XLOC_063287	TCONS_00105145	-9.19409	0.000106088	24Zn/24Fe
4HS	MLOC_71198	Transcription factor VIP1; a ZIP member that binds specifically to the VIP1 response elements (VREs) DNA sequence 5'-ACNGCT-3' found in some stress genes (e.g. TRX8 and MYB44), when phosphorylated/activated by MPK3. Required for Agrobacterium VirE2 nuclear import and tumorigenicity. Promotes transient expression of T-DNA in early stages by interacting with VirE2 in complex with the T-DNA and faci…	Triticum urartu	XLOC_063319	TCONS_00105293	-8.21611	0.000823026	24Zn/24Fe
4HS	MLOC_65929	Abc1, Abc2 Homolog 9	Brachypodium distachyon	XLOC_063409	TCONS_00105667	-7.40267	0.00501406	24Zn/24Fe
4HS	MLOC_14470	Auxilin-related protein 2; promotes probably uncoating of clathrin-coated vesicles; overexpression of this auxilin-like protein inhibits endocytosis in root hair cells by a disturbance of the transport system as in animal cells shown previously. It was also suggested that a part of the Al influx occurred via endocytosis in root hair cells in Arabidopsis. The Al resistance in the #355-2 line may t…	Triticum urartu	XLOC_063743	TCONS_00106525	-5.57005	0.00535653	24Zn/24Fe
4HS	MLOC_62624	Alpha/beta-Hydrolases superfamily protein, PGAP1-like protein; involved in intracellular protein transport, GPI anchor metabolic process. This is an endoplasmic reticulum membrane protein with a catalytic serine containing motif that is conserved in a number of lipases. PGAP1 functions as a GPI inositol-deacylase; this deacylation is important for the efficient transport of GPI-anchored proteins …	Arabidopsis thaliana	XLOC_063758	TCONS_00106603	-8.00742	0.00143305	24Zn/24Fe
4HS	MLOC_80687	A/N-INVI, ALKALINE/NEUTRAL INVERTASE I, CINV2, CYTOSOLIC INVERTASE 2 ; Involved in sucrose catabolic process.	Brachypodium distachyon	XLOC_063760	TCONS_00106613	-7.81557	0.00193549	24Zn/24Fe
4HS	MLOC_10797	mRNA-decapping enzyme-like protein, Dcp1-like	Brachypodium distachyon	XLOC_063793	TCONS_00106722	-7.53317	0.00376708	24Zn/24Fe
4HS	MLOC_80821	Armadillo repeat-containing protein 8; ARM-repeat-containing protein 8 (ARMC8) is part of the conserved C-terminal to LisH motif (CTLH) complex. The CLTH complex is involved in both proteasome/polyubiquitin dependent protein degradation and vacuole/lysosomemediated protein degradation (via monoubiquitination and endocytosis of target proteins) in both yeast and human cells. Substrates include yea…	Brachypodium distachyon	XLOC_063834	TCONS_00106846	-7.93843	0.00165772	24Zn/24Fe
4HS	MLOC_80821	Armadillo repeat-containing protein 8; ARM-repeat-containing protein 8 (ARMC8) is part of the conserved C-terminal to LisH motif (CTLH) complex. The CLTH complex is involved in both proteasome/polyubiquitin dependent protein degradation and vacuole/lysosomemediated protein degradation (via monoubiquitination and endocytosis of target proteins) in both yeast and human cells. Substrates include yea…	Brachypodium distachyon	XLOC_063834	TCONS_00106853	7.75976	0.00241947	24Zn/24Fe
4HS	MLOC_20047	Transducin/WD40 repeat-like superfamily protein; Involved in hormone-mediated signaling pathway, signal transduction, pre-mRNA processing and cytoskeleton assembly	Brachypodium distachyon	XLOC_063858	TCONS_00106950	7.49806	0.00376708	24Zn/24Fe
4HS	MLOC_74552	RNA-binding protein Musashi-like protein 2; RNA binding protein that regulates the expression of target mRNAs at the translation level. May play a role in the proliferation and maintenance of stem cells in the central nervous system in mouse.	Triticum urartu	XLOC_063874	TCONS_00106999	-8.32822	0.000659943	24Zn/24Fe
4HS	MLOC_76839	Putative NAD kinase 2, chloroplastic; involved in chlorophyll synthesis and chloroplast protection against oxidative damage.	Aegilops tauschii	XLOC_063881	TCONS_00107042	7.39909	0.00538066	24Zn/24Fe
chr5	MLOC_61021	Pentatricopeptide repeat-containing protein At1g18900-like	Brachypodium distachyon	XLOC_067144	TCONS_00110526	7.36453	0.00501406	24Zn/24Fe
chr5	XLOC_067165	TaENO-a enolase, Enolase, which is an enzyme involved in glycolysis, converts 2-phospho-D-glycerate to phosphoenolpyruvate, is present as multiple isoforms in most of the higher plants. in abiotic stress tolerance in plants. Enolase transcripts have been reported to increase in response to low and high temperatures, salt stress and anaerobic conditions in Mesembryanthemum crystallinum and in resp…	Triticum aestivum	XLOC_067165	TCONS_00110603	8.17313	0.000823026	24Zn/24Fe
chr5	MLOC_10278	TELOMERE REPEAT BINDING FACTOR 1, TRB1	Triticum urartu	XLOC_067259	TCONS_00110890	-7.33271	0.00580225	24Zn/24Fe
chr5	ZIP1, MLOC_63066	Transcription factor HBP-1a; binds to the hexamer motif 5'-ACGTCA-3' of histone gene promoters (EMBO J 1991, 10:1459-67; Science 1989, 245:965-7; Mol Gen Genet 1995, 248:573-82). TabZIP1 gene is involved in stress tolerance and defense response to stripe rust pathogen infection through the ET/MeJA-dependent signal transduction pathways (Physiological and Molecular Plant Pathology 2008, 73:88-94).…	Triticum urartu	XLOC_067262	TCONS_00110914	7.70557	0.00256045	24Zn/24Fe
chr5	NAC1	NAC domain-containing protein 21/22, NAC1; transcriptional activator that mediates auxin signaling to promote lateral root development. Activates the expression of two downstream auxin-responsive genes, DBP and AIR3. Arabidopsis NAC1 transduces auxin signal downstream of TIR1 to promote lateral root development (Genes Dev 2000, 14:3024-36). Downregulated by miR164 and SIANT5 ubiquitin degradation…	Aegilops tauschii	XLOC_067272	TCONS_00110944	-8.13622	0.00107962	24Zn/24Fe
chr5	MLOC_12185	Methylcrotonyl-CoA carboxylase alpha chain, mitochondrial / 3-methylcrotonyl-CoA carboxylase 1; Involved in leucine degradation	Triticum urartu	XLOC_067290	TCONS_00111015	-7.50164	0.00376708	24Zn/24Fe
chr5	MLOC_70865	Tesmin/TSO1-like CXC domain-containing protein; involved in transcription regulation	Brachypodium distachyon	XLOC_067292	TCONS_00111024	-7.62384	0.00289516	24Zn/24Fe
chr5	MLOC_17982	RING/U-box superfamily protein	Aegilops tauschii	XLOC_067342	TCONS_00111224	-7.33271	0.00580225	24Zn/24Fe
chr5	MLOC_54346	E3 ubiquitin-protein ligase UPL1; probable E3 ubiquitin-protein ligase which mediates ubiquitination and subsequent proteasomal degradation of target proteins (Plant J 1999, 20:183-95.)	Aegilops tauschii	XLOC_067350	TCONS_00111247	14.0252	4.19e-10	24Zn/24Fe
chr5	MLOC_66679	DNAJ heat shock N-terminal domain-containing protein; involved in protein folding	Brachypodium distachyon	XLOC_067368	TCONS_00111300	-7.86598	0.00185523	24Zn/24Fe
chr5	MLOC_59478	Protein DA1-related 1(DAR1); a zinc binding plasma membrane ubiquitin receptor. It controls seed size positively in Arabidopsis (see Genes Dev 2008, 22:1331-6). DA1 expression is induced by the growth regulator abscisic acid (ABA).	Triticum urartu	XLOC_067386	TCONS_00111384	-7.81557	0.00201336	24Zn/24Fe
chr5	MLOC_16711	ATCBL3, CALCINEURIN B-LIKE 3, CBL3; Involved in calcium signaling	Arabidopsis	XLOC_067389	TCONS_00111396	-7.14134	0.00805497	24Zn/24Fe
chr5	MLOC_59658	Ankyrin-3, involved in golgi to plasma membrane protein transport and their maintenance.	Aegilops tauschii	XLOC_067430	TCONS_00111611	-9.40481	6.88e-05	24Zn/24Fe
chr5	MLOC_63764	Uncharacterized		XLOC_067492	TCONS_00111835	-7.36811	0.00538066	24Zn/24Fe
chr5	MLOC_54689	Nucleosome-remodeling factor subunit NURF301, Nucleosome-remodeling factor 215 kDa subunit, Enhancer of bithorax; Histone-binding component of NURF (nucleosome remodeling factor), a complex which catalyzes ATP-dependent nucleosome sliding and facilitates transcription of chromatin. Specifically recognizes H3 tails trimethylated on 'Lys-4' (H3K4me3), which mark transcription start sites of virtual…	Aegilops tauschii	XLOC_067561	TCONS_00112091	-5.70691	0.00130873	24Zn/24Fe
chr5	MLOC_37715	FAM135B-like, with unknown function	Brachypodium distachyon	XLOC_067580	TCONS_00112160	-9.50364	4.77e-05	24Zn/24Fe
chr5	MLOC_37715	FAM135B-like, with unknown function	Brachypodium distachyon	XLOC_067580	TCONS_00112167	8.61659	0.000319189	24Zn/24Fe
chr5	MLOC_43149	RAPTOR, Regulatory-associated protein of Mtor, p150 target of rapamycin (TOR)-scaffold protein; involved in the control of the mammalian target of rapamycin complex 1 (mTORC1) activity which regulates cell growth and survival, and autophagy in response to nutrient and hormonal signals; functions as a scaffold for recruiting mTORC1 substrates. mTORC1 is activated in response to growth factors or a…	Aegilops tauschii	XLOC_067609	TCONS_00112281	-4.95048	0.00403395	24Zn/24Fe
chr5	MLOC_66405	UDP-galactose transporter 2-like, UDP-RHA/UDP-GAL Transporter 5, URGT5; Involved in carbohydrate transport, purine nucleobase transport	Brachypodium distachyon	XLOC_067624	TCONS_00112349	7.29283	0.00626135	24Zn/24Fe
chr5	MLOC_36986	FRIGIDA-like protein, putative ABI3-interacting protein 2; involvd in transition from vegetative growth to reproductive phase (flowering) [see Plant Mol Biol 2010, 73:493-505; Development 2005, 132:5471-8; Plant Physiol 2013, 161:179-95]. It upregulates the flowering locus C during winter and postponse the flowering until spring in arabidopsis winter accessions.	Brachypodium distachyon, Oryza sativa	XLOC_067640	TCONS_00112416	-9.89813	2.92e-05	24Zn/24Fe
chr5	MLOC_75853	U4/U6 small nuclear ribonucleoprotein Prp3-like; participates in pre-mRNA splicing. Part of the U4/U5/U6 tri-snRNP complex, one of the building blocks of the spliceosome in human. This isoform has CHL/ER/GOL/NUC/PER signal peptides.	Brachypodium distachyon	XLOC_067678	TCONS_00112537	6.45947	0.000785988	24Zn/24Fe
chr5	MLOC_59895	Histone-lysine N-methyltransferase NSD3, Nuclear SET domain-containing protein 3; Histone methyltransferase. Preferentially methylates 'Lys-4' and 'Lys-27' of histone H3. H3 'Lys-4' methylation represents a specific tag for epigenetic transcriptional activation, while 'Lys-27' is a mark for transcriptional repression.	Aegilops tauschii	XLOC_067690	TCONS_00112586	-8.15661	0.00103193	24Zn/24Fe
chr5	MLOC_64864	HvEMF2b, embryonic flower 2; together with EMF2 functions in maintaining the repression of the flower homeotic gene AGAMOUS (AG) during vegetative development in Arabidopsis thaliana (The Plant Cell 2001, 13:2471-2481; Biotechnology Letters 2010, 32:1961-1968;Plant Cell 2008, 20:277-291; Plant Cell Physiol 2012, 53:1217-31). The EMBRYONIC FLOWER (EMF) genes are required to maintain vegetative dev…		XLOC_067746	TCONS_00112828	6.15462	0.00130668	24Zn/24Fe
chr5	MLOC_54108	Zinc finger CCCH domain-containing protein 59-like	Brachypodium distachyon	XLOC_067774	TCONS_00112951	7.43284	0.00434145	24Zn/24Fe
chr5	MLOC_13051	Acyl-activating enzyme 17; Involved in fatty acid metabolic process	Brachypodium distachyon	XLOC_067780	TCONS_00112965	-5.2471	0.00398755	24Zn/24Fe
chr5	MLOC_11145	6-phosphofructokinase 5 (PFK5), chloroplastic-like; Catalyzes ATP + D-fructose 6-phosphate = ADP + D-fructose 1,6-bisphosphate. Phosphofructokinase is a kinase enzyme that phosphorylates fructose 6-phosphate in glycolysis.	Brachypodium distachyon	XLOC_067878	TCONS_00113279	-7.05707	0.00886598	24Zn/24Fe
chr5	MLOC_9815	Serine/threonine-protein kinase PEPKR2, Protein PHOSPHOENOLPYRUVATE CARBOXYLASE-RELATED KINASE 2; PEPC is activated at night via phosphorylation of a Ser residue near the N terminus of the protein that renders the enzyme more sensitive to PEP and the positive effectors, Glc-6-P and triose-P, and less sensitive to the allosteric inhibitor, malate. The phosphorylation state of PEPC is determined by…	Aegilops tauschii	XLOC_067967	TCONS_00113547	-4.77933	0.00784727	24Zn/24Fe
chr5	MLOC_35082	Uncharacterized		XLOC_068050	TCONS_00113873	8.13263	0.00107962	24Zn/24Fe
chr5	XLOC_068051	Probable E3 ubiquitin-protein ligase ARI7-like, ARIADNE-like protein ARI7, Protein ariadne homolog 7; might act as an E3 ubiquitin-protein ligase, or as part of E3 complex, which accepts ubiquitin from specific E2 ubiquitin-conjugating enzymes and then transfers it to substrates (Mol Biol Evol 2002, 19:2039-50).	Brachypodium distachyon	XLOC_068051	TCONS_00113884	7.52959	0.00306081	24Zn/24Fe
chr5	XLOC_068051	Probable E3 ubiquitin-protein ligase ARI7-like, ARIADNE-like protein ARI7, Protein ariadne homolog 7; might act as an E3 ubiquitin-protein ligase, or as part of E3 complex, which accepts ubiquitin from specific E2 ubiquitin-conjugating enzymes and then transfers it to substrates (Mol Biol Evol 2002, 19:2039-50).	Brachypodium distachyon	XLOC_068051	TCONS_00113886	-8.9589	0.000147561	24Zn/24Fe
chr5	MLOC_51044	WD repeat and FYVE domain-containing protein 3, WD/BEACH domain protein SPIRRIG, BEACH domain-containing protein lvsA; WD repeat and FYVE domain-containing protein 3 is a phosphatidylinositol 3-phosphate-binding protein that functions as a master conductor for aggregate clearance by autophagy. This protein shuttles from the nuclear membrane to colocalize with aggregated proteins, where it complex…	Setaria italica	XLOC_068338	TCONS_00114857	5.52135	0.000299445	24Zn/24Fe
chr5	MLOC_10398	ABC transporter B family member 27, ABCB27, ALS1, ALUMINUM SENSITIVE 1, ATTAP2, TAP2; A tonoplast-localized half-size ABC transporter (OsALS1) is required for internal detoxification of aluminum in rice. Os03g0755100 (OsALS1) is regulated by ART1, a C2H2-type zinc finger transcription factor. The expression of tonoplast localized OsALS1 was rapidly and specifically induced by Al in the roots, but…	Arabidopsis thaliana	XLOC_068379	TCONS_00115088	-8.87524	0.000210862	24Zn/24Fe
chr5	MLOC_38882	Uncharacterized		XLOC_068386	TCONS_00115101	7.32913	0.00538066	24Zn/24Fe
chr5	MLOC_55782	IMB1, Transcription factor GTE1, Bromodomain-containing protein GTE1, Protein GLOBAL TRANSCRIPTION FACTOR GROUP E1; Transcription activator that plays a role in the promotion of seed germination by both negatively and positively regulating the abscisic acid (ABA) and phytochrome A (phyA) transduction pathways, respectively (Plant J 2003, 35:787-99).	Triticum urartu	XLOC_068407	TCONS_00115193	-7.25918	0.00626135	24Zn/24Fe
chr5	MLOC_52788, TUA4	Alpha tubulin-4A; tubulin is the major constituent of microtubules. It binds two moles of GTP, one at an exchangeable site on the beta chain and one at a non-exchangeable site on the alpha chain.	Triticum aestivum	XLOC_068426	TCONS_00115274	-7.53317	0.00376708	24Zn/24Fe
chr5	MLOC_5110	P-loop containing nucleoside triphosphate hydrolases superfamily protein; involved in RNA secondary structure unwinding, chromosome segregation, regulation of gene expression, translational initiation	Arabidopsis	XLOC_068563	TCONS_00115785	-8.15661	0.00103193	24Zn/24Fe
chr5	MLOC_56756	Glycine-rich RNA-binding protein 3	Aegilops tauschii	XLOC_068570	TCONS_00115799	-7.33271	0.00501406	24Zn/24Fe
chr5	XLOC_068718	Probable cellulose synthase A catalytic subunit 5 [UDP-forming]-like, CESA5; catalytic subunit of cellulose synthase terminal complexes ('rosettes'), required for beta-1,4-glucan microfibril crystallization, a major mechanism of the cell wall formation.	Brachypodium distachyon	XLOC_068718	TCONS_00116264	4.56232	0.00209511	24Zn/24Fe
chr5	MLOC_73572	Serine/threonine-kinase PRP4-like protein; has a role in pre-mRNA splicing in human.	Aegilops tauschii	XLOC_068872	TCONS_00116841	-7.56403	0.00325322	24Zn/24Fe
chr5	MLOC_6173	Sucrose-6F-phosphate phosphohydrolase SPP3; sucrose-6(F)-phosphate phosphohydrolase (SPP; EC ) catalyzes the final step in the pathway of sucrose biosynthesis and is the only enzyme of photosynthetic carbon assimilation (Proc Natl Acad Sci U S A 2000, 97:12914-9; Gene 2003, 303:187-96).	Triticum aestivum	XLOC_068885	TCONS_00116895	8.00383	0.00117959	24Zn/24Fe
chr5	MLOC_69812	Peroxin 3; Involved in peroxisome organization	Brachypodium distachyon	XLOC_068898	TCONS_00116948	4.89401	0.00560563	24Zn/24Fe
chr5	MLOC_11804	Uncharacterized		XLOC_068907	TCONS_00116970	-6.96757	0.00418535	24Zn/24Fe
chr5	MLOC_52439	Myb-related protein MYBAS2 (MYB17); a transcription factor responds to salicylic acid stimulus.	Triticum urartu	XLOC_069217	TCONS_00117975	8.64566	0.000299092	24Zn/24Fe
chr5	XLOC_069270	Uncharacterized		XLOC_069270	TCONS_00118169	13.9056	4.19e-10	24Zn/24Fe
chr5	XLOC_069270	Uncharacterized		XLOC_069270	TCONS_00118170	12.6039	2.01e-08	24Zn/24Fe
chr5	XLOC_069349	Uncharacterized		XLOC_069349	TCONS_00118426	-7.59425	0.00325322	24Zn/24Fe
chr5	MLOC_4561	Macrophage migration inhibitory factor family protein; involved in the innate immune response to bacterial pathogens. The expression of MIF at sites of inflammation suggests a role as mediator in regulating the function of macrophages in host defense. With phenylpyruvate tautomerase activity.	Oryza sativa	XLOC_069352	TCONS_00118437	7.13777	0.00886598	24Zn/24Fe
chr5	MLOC_55862	CCR4-NOT transcription complex subunit 4, E3 ubiquitin-protein ligase CNOT4; the Arabidopsis homologs of CCR4-associated factor 1 show mRNA deadenylation activity and play a role in plant defence responses. T-DNA insertion mutants disrupting the expression of AtCAF1a and/or AtCAF1b are defective in deadenylation of stress-related mRNAs, indicating that the two AtCAF1 proteins are involved in regu…	Triticum urartu	XLOC_069360	TCONS_00118472	-5.2471	0.00409664	24Zn/24Fe
chr5	MLOC_58260	Uncharacterized		XLOC_069416	TCONS_00118721	-7.40267	0.00434145	24Zn/24Fe
chr5	MLOC_59580	Ferrochelatase-2, chloroplastic		XLOC_069462	TCONS_00118880	7.29283	0.00626135	24Zn/24Fe
chr5	MLOC_36393	DNA topoisomerase 6 subunit B-like; once cut, the ends of the DNA are separated, and a second DNA duplex is passed through the break. Following passage, the cut DNA is religated. This reaction allows type II topoisomerases to increase or decrease the linking number of a DNA loop by 2 units, and it promotes chromosome disentanglement. Overexpression of OsTOP6A3 and OsTOP6B in transgenic Arabidopsi…	Brachypodium distachyon	XLOC_069474	TCONS_00118931	7.21738	0.00676821	24Zn/24Fe
chr5	HIR3	Hypersensitive induced response protein 3, HIR3; self-interacts and forms heteromers. Interacts with NB-LRR class of R proteins before R proteins (e.g. RPS2 or RPM1) are activated by the effectors (Proteomics 2007, 6:1980-96; Mol Cell Proteomics 2004, 3:675-91; Plant Cell Physiol 2004, 45:1543-1556). Arabidopsis RPS2 is a typical nucleotide-binding leucine-rich repeat resistance protein, which in…	Triticum aestivum	XLOC_069552	TCONS_00119198	-9.29871	8.2e-05	24Zn/24Fe
chr5	ISA2	BE2, BRANCHING ENZYME 2, DBE1, DEBRANCHING ENZYME 1; Encodes a protein with strong similarity to isoamylase. Involved in starch biosynthesis.		XLOC_069670	TCONS_00119637	7.13777	0.00805497	24Zn/24Fe
chr5	MLOC_31949	Disease resistance RPP8-like protein 3 (RPP8L3); The LRR repeats probably act as specificity determinant of pathogen recognition.	Aegilops tauschii	XLOC_069718	TCONS_00119809	7.0535	0.00981023	24Zn/24Fe
chr5	MLOC_75155	Uncharacterized; with domain DUF4210 may involved in chromosome segregation during meiosis.		XLOC_069793	TCONS_00120066	-7.43642	0.00403395	24Zn/24Fe
chr5	MLOC_75155	Uncharacterized; with domain DUF4210 may involved in chromosome segregation during meiosis.		XLOC_069793	TCONS_00120067	8.13263	0.0010123	24Zn/24Fe
chr5	MLOC_32662	Receptor-like protein kinase FERONIA; a Receptor-like protein kinase that mediates the female control of male gamete delivery during fertilization, including growth cessation of compatible pollen tubes ensuring a reproductive isolation barriers. Required for cell elongation during vegetative growth, mostly in a brassinosteroids- (BR-) independent manner. Induced by brassinosteroids (BR) and invol…	Aegilops tauschii	XLOC_069905	TCONS_00120444	-5.52347	0.00213551	24Zn/24Fe
chr5	MLOC_65020	5'-3' exoribonuclease 2, XRN2; possesses 5'->3' exoribonuclease activity. Acts as an endogenous post-transcriptional gene silencing (PTGS) suppressor. Degrades MIRNA-derived loops excised during miRNA maturation in the nucleus (Plant Cell 2007, 19:3451-61; New Phytol 2011, 189:484-93).	Triticum urartu	XLOC_069918	TCONS_00120515	-7.1817	0.00805497	24Zn/24Fe
chr5	MLOC_65020	5'-3' exoribonuclease 2, XRN2; possesses 5'->3' exoribonuclease activity. Acts as an endogenous post-transcriptional gene silencing (PTGS) suppressor. Degrades MIRNA-derived loops excised during miRNA maturation in the nucleus (Plant Cell 2007, 19:3451-61; New Phytol 2011, 189:484-93).	Triticum urartu	XLOC_069918	TCONS_00120521	7.39909	0.00501406	24Zn/24Fe
chr5	MLOC_63880	Uncharacterized		XLOC_070100	TCONS_00121206	-7.33271	0.00538066	24Zn/24Fe
chr5	MLOC_64140	NAD-Malate dehydrogenase 2; Involved in fatty acid beta-oxidation through providing NAD to the process of converting fatty acyl CoA to acetyl CoA.	Aegilops tauschii	XLOC_070118	TCONS_00121260	7.43284	0.00403395	24Zn/24Fe
chr5	MLOC_64140	NAD-Malate dehydrogenase 2; Involved in fatty acid beta-oxidation through providing NAD to the process of converting fatty acyl CoA to acetyl CoA.	Aegilops tauschii	XLOC_070118	TCONS_00121261	5.17469	0.00665211	24Zn/24Fe
chr5	MLOC_75153	Uncharacterized		XLOC_070189	TCONS_00121507	8.25087	0.000823026	24Zn/24Fe
chr5	MLOC_44316	PHD finger protein ALFIN-LIKE 3-like isoform X3; Histone-binding component that specifically recognizes H3 tails trimethylated on 'Lys-4' (H3K4me3), which mark transcription start sites of virtually all active genes (Plant J 2009, 58:511-24).	Setaria italica	XLOC_070297	TCONS_00121823	-7.53317	0.00306081	24Zn/24Fe
chr5	MLOC_44316	PHD finger protein ALFIN-LIKE 3-like isoform X3; Histone-binding component that specifically recognizes H3 tails trimethylated on 'Lys-4' (H3K4me3), which mark transcription start sites of virtually all active genes (Plant J 2009, 58:511-24).	Setaria italica	XLOC_070297	TCONS_00121826	-8.0297	0.00136463	24Zn/24Fe
chr5	MLOC_44316	PHD finger protein ALFIN-LIKE 3-like isoform X3; Histone-binding component that specifically recognizes H3 tails trimethylated on 'Lys-4' (H3K4me3), which mark transcription start sites of virtually all active genes (Plant J 2009, 58:511-24).	Setaria italica	XLOC_070297	TCONS_00121830	9.65105	3.72e-05	24Zn/24Fe
chr5	MLOC_62464	Urease; involved in N metaboism and catalyes Urea + H2O = CO2 + 2 NH3.	Aegilops tauschii	XLOC_070322	TCONS_00121925	-8.23541	0.000795144	24Zn/24Fe
chr5	MLOC_14456	PAE3, PECTIN ACETYLESTERASE 3; Encodes a pectin acetylesterase that removes cell wall acetate associated with pectin formation in Arabidopsis leaves.	Brachypodium distachyon, Arabidopsis	XLOC_070338	TCONS_00121972	7.78611	0.00225751	24Zn/24Fe
5HL	MLOC_51528	Uncharacterized		XLOC_076099	TCONS_00128642	6.51089	0.000730286	24Zn/24Fe
5HL	MLOC_12183	ZFN1, ZINC FINGER PROTEIN 1; involved in photomorphogenesis. Encodes a zinc finger protein that binds to PORA mRNA in vivo and recruits the Pfr form of phytochrome to the 5′-UTR of PORA mRNA to regulate translation of the mRNA	Brachypodium distachyon	XLOC_076123	TCONS_00128706	8.02611	0.00130668	24Zn/24Fe
5HL	MLOC_39504	Uncharacterized		XLOC_076227	TCONS_00129070	-4.09103	0.00813703	24Zn/24Fe
5HL	MLOC_38178	Pentatricopeptide repeat (PPR) superfamily protein	Brachypodium distachyon	XLOC_076254	TCONS_00129147	-7.68127	0.00271588	24Zn/24Fe
5HL	MLOC_48282	Uncharacterized		XLOC_076527	TCONS_00129750	7.43284	0.00434145	24Zn/24Fe
5HL	MLOC_65123	Tyrosine-protein phosphatase At1g05000-like; ATPFA-DSP1, PFA-DSP1, PLANT AND FUNGI ATYPICAL DUAL-SPECIﬁCITY PHOSPHATASE 1; may be regulated through the interaction with thioredoxins THM1/2/4 and involved in high light response in Arabidopsis. Mutants show increased damage under high light. Interacts with ferredoxin 2 (Fd2), ferredoxin-thioredoxin reductase variable subunit 1 (FTRv1), and three m …	Glycine max	XLOC_076696	TCONS_00130006	7.00944	0.00981023	24Zn/24Fe
5HL	MLOC_91	Putative disease resistance protein RGA3; disease resistance protein. Resistance proteins guard the plant against pathogens that contain an appropriate avirulence protein via a direct or indirect interaction with this avirulence protein. That triggers a defense system which restricts the pathogen growth. Belongs to a four-gene family located at the same locus. Although the four genes are expresse…	Aegilops tauschii	XLOC_076713	TCONS_00130079	-8.83785	0.000213553	24Zn/24Fe
5HL	MLOC_13593	Mitogen-activated protein kinase kinase kinase 1 (MEKK1); involved in the innate immune MAP kinase signaling cascade (MEKK1, MKK4/MKK5 and MPK3/MPK6) downstream of bacterial flagellin receptor FLS2. May be involved in the cold and salinity stress-mediated MAP kinase signaling cascade (MEKK1, MEK1/MKK2 and MPK4/MPK6). Activates downstream MKK2, MKK4 and MKK5.	Triticum urartu	XLOC_076748	TCONS_00130260	8.50996	0.000500216	24Zn/24Fe
5HL	MLOC_16590	ADP-ribosylation factor GTPase-activating protein AGD12-like isoform 1, Zinc- and calcium-binding protein; GTPase-activating protein (GAP) for ADP ribosylation factor (ARF). Binds phosphatidylinositol 3-monophosohate (PI-3-P) and anionic phospholipids. ARAP1 is a phosphatidylinositol 3,4,5-trisphosphate (PtdIns(3,4,5)P(3))-dependent Arf GTPase-activating protein (GAP) with five PH domains that re…	Brachypodium distachyon	XLOC_076847	TCONS_00130614	7.83741	0.00185523	24Zn/24Fe
5HL	XLOC_076902	Structural maintenance of chromosomes protein 6, DNA repair protein rad18; acts in a DNA repair pathway for removal of UV-induced DNA damage that is distinct from classical nucleotide excision repair and in repair of ionizing radiation damage. Functions in homologous recombination repair of DNA double strand breaks and in recovery of stalled replication forks. Plays a critical role in meiosis (Mo…	Aegilops tauschii	XLOC_076902	TCONS_00130789	-5.04762	0.0054065	24Zn/24Fe
5HL	XLOC_077053	Callose synthase 4; involved in callose synthesis at the forming cell plate during cytokinesis. During plant growth and development, callose is found as a transitory component of the cell plate in dividing cells, is a major component of pollen mother cell walls and pollen tubes, and is found as a structural component of plasmodesmatal canals. Required for proper cell division and tissue patternin…	Aegilops tauschii	XLOC_077053	TCONS_00131166	-10.8606	2.57e-06	24Zn/24Fe
5HS	MLOC_54490	Actin-binding; May involved in actin cytoskeleton organization	Brachypodium distachyon	XLOC_081300	TCONS_00135668	5.02144	0.0056722	24Zn/24Fe
5HS	XLOC_081314	Uncharacterized		XLOC_081314	TCONS_00135714	-8.82516	0.000239198	24Zn/24Fe
5HS	MLOC_11333	Conserved oligomeric Golgi complex component-related / COG complex component-related	Arabidopsis	XLOC_081349	TCONS_00135820	7.62026	0.00256045	24Zn/24Fe
5HS	MLOC_14592	PH-interacting protein, WD repeat-containing protein 11; stimulates cell proliferation through regulation of cyclin transcription and has an anti-apoptotic activity through AKT1 phosphorylation and activation.	Triticum urartu	XLOC_081379	TCONS_00135913	-10.0421	2.29e-05	24Zn/24Fe
5HS	MLOC_14592	PH-interacting protein, WD repeat-containing protein 11; stimulates cell proliferation through regulation of cyclin transcription and has an anti-apoptotic activity through AKT1 phosphorylation and activation.	Triticum urartu	XLOC_081379	TCONS_00135914	-8.19655	0.000966986	24Zn/24Fe
5HS	XLOC_081457	Endoribonuclease Dicer-like protein 2b; probably involved in the RNA silencing pathway. May cleave double-stranded RNA to produce short 21-24 nucleotides (nt) RNAs which target the selective destruction of complementary RNAs.	Triticum urartu	XLOC_081457	TCONS_00136096	-7.98479	0.00130668	24Zn/24Fe
5HS	XLOC_081462	Uncharacterized		XLOC_081462	TCONS_00136108	-5.59419	0.00501406	24Zn/24Fe
5HS	MLOC_4770	Formin-like protein 12 (FH12); formins (FH2 proteins) play a central part in the control of actin organization and dynamics.	Triticum urartu	XLOC_081634	TCONS_00136397	7.93485	0.00143305	24Zn/24Fe
5HS	MLOC_59421	Similar to retrotransposon proteins; it has GAG-pre-integrase and integrase core domains. Integrase mediates integration of a DNA copy of the viral genome into the host chromosome.		XLOC_081660	TCONS_00136480	5.3822	0.00735175	24Zn/24Fe
chr6	MLOC_5291	Uncharacterized protein		XLOC_084206	TCONS_00139332	4.81894	0.00462347	24Zn/24Fe
chr6	MLOC_11348	Lysine-specific demethylase 3B, partial (second half); histone demethylase that specifically demethylates 'Lys-9' of histone H3, thereby playing a central role in histone code. Demethylation of Lys residue generates formaldehyde and succinate. May have tumor suppressor activity.	Triticum urartu	XLOC_084224	TCONS_00139391	-7.65284	0.00289516	24Zn/24Fe
chr6	MLOC_55110	E3 ubiquitin-protein ligase MARCH8, Membrane-associated RING finger protein 8; ZINC binding, involved in ubiquitination and degradation of proteins.	Aegilops tauschii	XLOC_084406	TCONS_00139951	7.62026	0.00306081	24Zn/24Fe
chr6	MLOC_73269	ABCB4, P-GLYCOPROTEIN 4, ABCB4, ATP-BINDING CASSETTE B4, PGP4, MDR4, MULTIDRUG RESISTANCE 4, plasma membrane; Plant Physiol. 2012 Jun;159(2):642-54. ATP-binding cassette B4, an auxin-efflux transporter, stably associates with the plasma membrane and shows distinctive intracellular trafficking from that of PIN-FORMED proteins.Cho M, Lee ZW, Cho HT. Plant J. 2012 Feb;69(4):640-54. The Arabidopsis c…	Aegilops tauschii, Arabidopsis	XLOC_084460	TCONS_00140198	7.32913	0.00538066	24Zn/24Fe
chr6	MLOC_73159	Calnexin-like protein; a calcium-binding protein that interacts with newly synthesized glycoproteins in the endoplasmic reticulum. It may act in assisting protein assembly and/or in the retention within the ER of unassembled protein subunits. It seems to play a major role in the quality control apparatus of the ER by the retention of incorrectly folded proteins.	Aegilops tauschii	XLOC_084468	TCONS_00140228	9.85774	2.92e-05	24Zn/24Fe
chr6	MLOC_73159	Calnexin-like protein; a calcium-binding protein that interacts with newly synthesized glycoproteins in the endoplasmic reticulum. It may act in assisting protein assembly and/or in the retention within the ER of unassembled protein subunits. It seems to play a major role in the quality control apparatus of the ER by the retention of incorrectly folded proteins.	Aegilops tauschii	XLOC_084468	TCONS_00140229	8.09097	0.0011253	24Zn/24Fe
chr6	MLOC_76355	SKB1 (SHK1 binding protein 1); mediateS histone H4R3 dimethylation and negatively regulates iron homeostasis in Arabidopsis. Plant J. 2014 Jan;77(2):209-21.	Arabidopsis	XLOC_084500	TCONS_00140313	-7.53317	0.00350986	24Zn/24Fe
chr6	XLOC_084517	Protein BONZAI 1-like, COPINE1, BON1, CPN1; it is a egative regulator of cell death and defense responses. Negative regulator of several R genes, including SNC1. May have effects in promoting growth and development. May function in membrane trafficking and in fusion of vesicles with plasma membrane at low temperature. Exhibits calcium-dependent phospholipid binding properties (Plant Cell 2004, 16…	Brachypodium distachyon	XLOC_084517	TCONS_00140379	-7.62384	0.00271588	24Zn/24Fe
chr6	XLOC_084517	Protein BONZAI 1-like, COPINE1, BON1, CPN1; it is a egative regulator of cell death and defense responses. Negative regulator of several R genes, including SNC1. May have effects in promoting growth and development. May function in membrane trafficking and in fusion of vesicles with plasma membrane at low temperature. Exhibits calcium-dependent phospholipid binding properties (Plant Cell 2004, 16…	Brachypodium distachyon	XLOC_084517	TCONS_00140382	-7.68127	0.00241947	24Zn/24Fe
chr6	MLOC_57298	EIF4A1, EUKARYOTIC TRANSLATION INITIATION FACTOR 4A1	Arabidopsis	XLOC_084528	TCONS_00140432	8.25087	0.000737145	24Zn/24Fe
chr6	MLOC_12747	Ethylene-responsive transcription factor WIN1; promotes cuticle formation by inducing the expression of enzymes involved in wax biosynthesis. Confers drought resistance. Acts as a transcriptional activator. Binds to the GCC-box pathogenesis-related promoter element. May be involved in the regulation of gene expression by stress factors and by components of stress signal transduction pathways (Pro…	Triticum urartu	XLOC_084585	TCONS_00140636	7.9812	0.0012483	24Zn/24Fe
chr6	XLOC_084588	Adenosylmethionine-8-amino-7-oxononanoate aminotransferase-like; catalyzes the transfer of the alpha-amino group from S-adenosyl-L-methionine (SAM) to 7-keto-8-aminopelargonic acid (KAPA) to form 7,8-diaminopelargonic acid (DAPA) [S-adenosyl-L-methionine + 8-amino-7-oxononanoate = S-adenosyl-4-methylthio-2-oxobutanoate + 7,8-diaminononanoate]. It is the only animotransferase known to utilize SAM …	Brachypodium distachyon	XLOC_084588	TCONS_00140641	-7.25918	0.00676821	24Zn/24Fe
chr6	MLOC_15650	Alpha-amylase inhibitor BMAI-1 (Alpha-amylase flour inhibitor);		XLOC_084636	TCONS_00140815	-7.70915	0.00225751	24Zn/24Fe
chr6	MLOC_55923	brefeldin A-inhibited guanine nucleotide-exchange protein 1; Promotes the activation of ARF1/ARF3 through replacement of GDP with GTP. Involved in vesicular trafficking. Required for the maintenance of Golgi structure; the function may be independent of its GEF activity.	Brachypodium distachyon	XLOC_084702	TCONS_00141034	5.51404	0.00582096	24Zn/24Fe
chr6	MLOC_43675	Uncharacterized		XLOC_084762	TCONS_00141216	-7.59425	0.00306081	24Zn/24Fe
chr6	XLOC_084808	Putative non-LTR retroelement reverse transcriptase; RT_nLTR: Non-LTR (long terminal repeat) retrotransposon and non-LTR retrovirus reverse transcriptase (RT). This subfamily contains both non-LTR retrotransposons and non-LTR retrovirus RTs. RTs catalyze the conversion of single-stranded RNA into double-stranded DNA for integration into host chromosomes. RT is a multifunctional enzyme with RNA-di…	Sorghum bicolor	XLOC_084808	TCONS_00141411	-6.22224	5.79e-05	24Zn/24Fe
chr6	XLOC_084811	Putitive miRNA, Similar to Oryza sativa miR396g; known to regulate GROWTH-REGULATING FACTORs (GRFs), a plant specific family of transcription factor and bHLH74. bHLH74 repression by miR396 is required for margin and vein pattern formation of Arabidopsis leaves (PLoS Genet 8: e1002419). Putitive miRNA predicted by findMiRNA programm at http://linux1.softberry.com/berry.phtml?topic=findmirna&group=…		XLOC_084811	TCONS_00141417	-5.83612	0.00295643	24Zn/24Fe
chr6	XLOC_084811	Putitive miRNA, Similar to Oryza sativa miR396g; known to regulate GROWTH-REGULATING FACTORs (GRFs), a plant specific family of transcription factor and bHLH74. bHLH74 repression by miR396 is required for margin and vein pattern formation of Arabidopsis leaves (PLoS Genet 8: e1002419). Putitive miRNA predicted by findMiRNA programm at http://linux1.softberry.com/berry.phtml?topic=findmirna&group=…		XLOC_084811	TCONS_00141418	8.57185	0.0003916	24Zn/24Fe
chr6	MLOC_55960	Protein FAR1-RELATED SEQUENCE 5, CLIP-associating protein 1-A (Cytoplasmic linker-associated protein 1-A); putative transcription activator involved in regulating light control of development (Plant Physiol 2004, 136:4010-4022).	Triticum urartu	XLOC_084858	TCONS_00141611	9.27665	8.19e-05	24Zn/24Fe
chr6	MLOC_77649	Endosomal targeting BRO1-like domain-containing protein; myristoylated. N-Myristoylation is an irreversible modification that affects the membrane binding properties of crucial cytoplasmic proteins from signal transduction cascades. In yeast,as a cytoplasmic class E vacuolar protein sorting (VPS) factor coordinates deubiquitination in the multivesicular body (MVB) pathway by recruiting Doa4p to e…	Arabidopsis thaliana	XLOC_084876	TCONS_00141661	7.78611	0.00225751	24Zn/24Fe
chr6	MLOC_44490	SETH1; Encodes a putative phosphatidylinositol-glycan synthase subunit C gene. It is involved in the first step of the glycosylphosphatidylinositol (GPI) biosynthetic pathway.	Aegilops tauschii	XLOC_084890	TCONS_00141722	7.2556	0.00626135	24Zn/24Fe
chr6	MLOC_4459	Serine/threonine-protein kinase AFC1, AFC1, AME2, FC1, FUS3-COMPLEMENTING GENE 1; activator of yeast transcription factor, STE12.	Aegilops tauschii	XLOC_084972	TCONS_00142001	10.1744	1.27e-05	24Zn/24Fe
chr6	MLOC_4459	Serine/threonine-protein kinase AFC1, AFC1, AME2, FC1, FUS3-COMPLEMENTING GENE 1; activator of yeast transcription factor, STE12.	Aegilops tauschii	XLOC_084972	TCONS_00142005	-9.66179	3.57e-05	24Zn/24Fe
chr6	MLOC_4459	Serine/threonine-protein kinase AFC1, AFC1, AME2, FC1, FUS3-COMPLEMENTING GENE 1; activator of yeast transcription factor, STE12.	Aegilops tauschii	XLOC_084972	TCONS_00142007	-8.15661	0.00103193	24Zn/24Fe
chr6	MLOC_21728	Eukaryotic translation initiation factor 3 subunit	Ricinus communis	XLOC_085073	TCONS_00142403	7.2556	0.00626135	24Zn/24Fe
chr6	MLOC_55832	ADP-ribosylation factor GTPase-activating protein AGD12, Zinc- and calcium-binding protein; GTPase-activating protein (GAP) for ADP ribosylation factor (ARF). Binds phosphatidylinositol 3-monophosohate (PI-3-P) and anionic phospholipids.	Aegilops tauschii	XLOC_085090	TCONS_00142484	7.09625	0.00805497	24Zn/24Fe
chr6	MLOC_50966	Zinc finger protein CONSTANS-LIKE 10, COL10	Aegilops tauschii	XLOC_085096	TCONS_00142505	7.83741	0.00193549	24Zn/24Fe
chr6	MLOC_50966	Zinc finger protein CONSTANS-LIKE 10, COL10	Aegilops tauschii	XLOC_085096	TCONS_00142514	8.06967	0.0011253	24Zn/24Fe
chr6	MLOC_7217	RNA-binding Musashi-2-like protein, MSI2; RNA binding protein that regulates the expression of target mRNAs at the translation level. May play a role in the proliferation and maintenance of stem cells in the human central nervous system.	Aegilops tauschii	XLOC_085105	TCONS_00142541	-8.25446	0.000857393	24Zn/24Fe
chr6	MLOC_58592	Ceramide kinase-like; ceramide 1-phosphate (C1P) is produced by ceramide kinase (CERK). Ceramides are found in high concentrations within the cell membrane of cells. Ceramide kinase (CERK) is a critical mediator of eicosanoid synthesis, and its product, ceramide-1-phosphate (C1P), is required for the production of prostaglandins in response to several inflammatory agonists. Treatment of several c…	Brachypodium distachyon	XLOC_085117	TCONS_00142575	-7.89054	0.00176441	24Zn/24Fe
chr6	MLOC_72462	mRNA capping enzyme family protein	Arabidopsis	XLOC_085131	TCONS_00142638	-7.33271	0.00501406	24Zn/24Fe
chr6	MLOC_36416	ZNMP, PREP1, PRESEQUENCE PROTEASE 1; involved in chloroplast organization.	Arabidopsis	XLOC_085222	TCONS_00142973	5.48862	0.00687985	24Zn/24Fe
chr6	MLOC_64237	Calcium uptake protein 1, mitochondrial-like; acts as a gatekeeper that senses calcium level via its EF-hand domains and sets a threshold for mitochondrial calcium uptake by MCU, thereby preventing mitochondrial calcium overload in human.	Brachypodium distachyon	XLOC_085244	TCONS_00143069	-7.09982	0.00981023	24Zn/24Fe
chr6	MLOC_45258	Uncharacterized		XLOC_085280	TCONS_00143163	7.59067	0.00306081	24Zn/24Fe
chr6	SDH	Lysine ketoglutarate reductase/saccharopine dehydrogenase; a bifunctional enzyme catalyzing the first two steps of lysine catabolism in animals and plants (J Biol Chem 2002, 277:49655-61). This isoform has just amino acids 837 to 921.	Triticum turgidum	XLOC_085281	TCONS_00143174	8.81247	4.39e-06	24Zn/24Fe
chr6	MLOC_57166	Uncharacterized		XLOC_085365	TCONS_00143478	-6.92065	0.00448612	24Zn/24Fe
chr6	MLOC_64600	Uncharacterized		XLOC_085686	TCONS_00144486	-7.4694	0.00434145	24Zn/24Fe
chr6	MLOC_66886	BAX inhibitor 1 (pBI-1); Bax Inhibitor-1 is a novel inositol 1,4,5-trisphosphate (IP3) receptor-interacting and -sensitizing protein which may contribute to a decrease in steady-state [Ca2+]ER and mitochondrial bioenergetics and subsequent induction of basal autophagy (see Cell Death and Disease 2012, 3: e367)		XLOC_085689	TCONS_00144496	8.58692	0.000417108	24Zn/24Fe
chr6	MLOC_13269	Uncharacterized		XLOC_085863	TCONS_00145149	7.13777	0.00805497	24Zn/24Fe
chr6	MLOC_13269	Uncharacterized		XLOC_085863	TCONS_00145150	7.64926	0.00271588	24Zn/24Fe
chr6	MLOC_30789	FGGY carbohydrate kinase domain-containing protein; glyerol/xylulose kinase and similar uncharacterized proteins from bacteria and eukaryota. Carbohydrate kinases catalyze the ATP-dependent phosphorylation of their carbohydrate substrate to produce phosphorylated sugar and ADP. The presence of Mg2+ is required for catalytic activity.	Triticum urartu	XLOC_085883	TCONS_00145236	-7.29641	0.00580225	24Zn/24Fe
chr6	MLOC_20229	Probable E3 ubiquitin-protein ligase ARI8-like; might act as an E3 ubiquitin-protein ligase, or as part of E3 complex, which accepts ubiquitin from specific E2 ubiquitin-conjugating enzymes and then transfers it to substrates.	Brachypodium distachyon	XLOC_085988	TCONS_00145671	8.15303	0.00103193	24Zn/24Fe
chr6	MLOC_35138	Zinc finger protein	Medicago truncatula	XLOC_086025	TCONS_00145817	-7.841	0.00193549	24Zn/24Fe
chr6	MLOC_65475	Uncharacterized		XLOC_086043	TCONS_00145885	4.96111	0.00805497	24Zn/24Fe
chr6	MLOC_59982	Somatic embryogenesis receptor kinase 2; serine/threonine-kinase involved in brassinosteroid-dependent and -independent signaling pathways. Acts redundantly with SERK1 as a control point for sporophytic development controlling male gametophyte production (Plant Physiol 2008, 148:611-9). SERK1 and SERK2 are essential for male microsporogenesis independent from BR (Plant Physiol 2008, 148:611-9).	Triticum aestivum	XLOC_086061	TCONS_00145955	-9.2521	9.08e-05	24Zn/24Fe
chr6	MLOC_60440	Uncharacterized		XLOC_086090	TCONS_00146052	-8.09455	0.00117959	24Zn/24Fe
chr6	MLOC_44491	Casein kinase I; involved in protein autophosphorylation	Aegilops tauschii	XLOC_086144	TCONS_00146278	7.0535	0.00981023	24Zn/24Fe
chr6	XLOC_086153	Uncharacterized		XLOC_086153	TCONS_00146319	7.0535	0.00886598	24Zn/24Fe
chr6	MLOC_23723	Uncharacterized		XLOC_086160	TCONS_00146368	7.21738	0.00676821	24Zn/24Fe
chr6	MLOC_68556	2-aminoethanethiol dioxygenase-like, Cysteamine dioxygenase; it adds two atoms of oxygen to free cysteamine (2-aminoethanethiol) to form hypotaurine. Cysteamine, is produced as a consequence of the degradation of coenzyme A. Elimination of iron binding by mutation of His-95, a strictly conserved putative metal coordinating residue, produced a catalytically inactive protein. Cysteine is used for m…	Brachypodium distachyon	XLOC_086258	TCONS_00146687	-7.59425	0.00306081	24Zn/24Fe
chr6	MLOC_51654	XTH30, XTR4, Xyloglucan endotransglucosylase; involved in cell wall organization.		XLOC_086264	TCONS_00146729	7.13777	0.00735175	24Zn/24Fe
chr6	MLOC_9789	GTP pyrophosphokinase	Triticum urartu	XLOC_086268	TCONS_00146763	8.52568	0.000477839	24Zn/24Fe
chr6	MLOC_4668	U-box domain-containing protein 7; functions as an E3 ubiquitin ligase (Plant Physiol 2004, 134:59-66).	Triticum urartu	XLOC_086295	TCONS_00146863	-7.59425	0.00325322	24Zn/24Fe
chr6	MLOC_60549	Omega-6 fatty acid desaturase, endoplasmic reticulum isozyme 2-like isoform 1; 16:3 and 18:3 fatty acids are important constituents of plant membranes. It is thought to use cytochrome b5 as an electron donor and to act on fatty acids esterified to phosphatidylcholine and, possibly, other phospholipids.	Brachypodium distachyon	XLOC_086307	TCONS_00146905	-5.23007	0.00368917	24Zn/24Fe
chr6	MLOC_50055	Putative WD repeat-containing protein; WD40 domain, found in a number of eukaryotic proteins that cover a wide variety of functions including adaptor/regulatory modules in signal transduction, pre-mRNA processing and cytoskeleton assembly.	Aegilops tauschii	XLOC_086331	TCONS_00147008	9.80717	2.92e-05	24Zn/24Fe
chr6	MLOC_50055	Putative WD repeat-containing protein; WD40 domain, found in a number of eukaryotic proteins that cover a wide variety of functions including adaptor/regulatory modules in signal transduction, pre-mRNA processing and cytoskeleton assembly.	Aegilops tauschii	XLOC_086331	TCONS_00147011	10.6101	4.96e-06	24Zn/24Fe
chr6	MLOC_63991	Potassium transporter 25-like; a high-affinity potassium transporter.	Brachypodium distachyon	XLOC_086349	TCONS_00147065	-4.84972	0.00370167	24Zn/24Fe
chr6	MLOC_70155	Oxidation resistance protein 1-like; may be involved in protection from oxidative DNA damage. Stress induction and mitochondrial localization of Oxr1 proteins in yeast and humans (Proc. Natl. Acad. Sci. U.S.A. 2000, 97:14530-14535; Mol. Cell. Biol. 2004, 24:3180-3187). This isofom seems to be an ? localized protein predicted by PlantLoc server.	Brachypodium distachyon	XLOC_086370	TCONS_00147136	-7.86598	0.00185523	24Zn/24Fe
chr6	MLOC_68391	Allene oxide cyclase 3, chloroplastic, AOC3; involved in the production of 12-oxo-phytodienoic acid (OPDA), a precursor of jasmonic acid. In addition, involved in response to salt stress and response to fungus (see Plant Mol Biol 2003, 51:895-911). When plants are challenged by herbivores or pathogens or when they experience mechanical stress (mechanical stimulus in mechanoreactions), appropriate…	Aegilops tauschii	XLOC_086472	TCONS_00147488	-7.841	0.00201336	24Zn/24Fe
chr6	MLOC_9878	OVULE ABORTION 2; involved in tRNA aminoacylation for protein translation		XLOC_086502	TCONS_00147605	4.96111	0.00669117	24Zn/24Fe
chr6	MLOC_51556	Serine/arginine-rich splicing factor 7, RS-CONTAINING ZINC FINGER PROTEIN 22A; involved in RNA splicing	Triticum urartu	XLOC_086538	TCONS_00147699	-9.00461	0.000139614	24Zn/24Fe
chr6	MLOC_61171	Calcineurin subunit B, CNB1; regulatory subunit of calcineurin, a calcium-dependent, calmodulin stimulated protein phosphatase. Confers calcium sensitivity. Calcineurin (PP2B), a serine/threonine phosphatase controlled by cellular calcium (The Journal of Biological Chemistry 2001, 276:2313-2316). Involved in K homeostasis (Plant J 2007, 52:223-39).	Triticum urartu	XLOC_086591	TCONS_00147899	5.57151	0.00171761	24Zn/24Fe
chr6	MLOC_53245	Myosin-Va-like; Myosin motor domain, plant-specific type XI myosin, involved in organelle transport. Myosins are actin-dependent molecular motors.	Brachypodium distachyon	XLOC_086645	TCONS_00148077	6.28052	0.000258616	24Zn/24Fe
chr6	MLOC_61553	Acetyl-coenzyme A synthetase (cytoplasmic); activates acetate so that it can be used for lipid synthesis or for energy generation.	Brachypodium distachyon	XLOC_086647	TCONS_00148081	9.02334	0.000125184	24Zn/24Fe
6HL	MLOC_58163	Bidirectional sugar transporter SWEET13; Mediates both low-affinity uptake and efflux of sugar across the plasma membrane (Nature 2010, 468:527-32). Plants transport fixed carbon predominantly as sucrose, which is produced in mesophyll cells and imported into phloem cells for translocation throughout the plant. It is not known how sucrose migrates from sites of synthesis in the mesophyll to the p…	Triticum urartu	XLOC_091568	TCONS_00153311	-5.87606	0.00283884	24Zn/24Fe
6HL	MLOC_56349	Tripeptidyl-peptidase 2, Tripeptidyl-peptidase II, Tripeptidyl aminopeptidase; component of the proteolytic cascade acting downstream of the 26S proteasome in the ubiquitin-proteasome pathway. May be able to complement the 26S proteasome function to some extent under conditions in which the latter is inhibited (Biochem Biophys Res Commun 2009, 389:575-579).	Triticum urartu	XLOC_091649	TCONS_00153607	-4.90664	0.0050572	24Zn/24Fe
6HL	MLOC_54489	Zinc finger protein; involved in protein ubiquitination.	Brachypodium distachyon	XLOC_091677	TCONS_00153708	-7.53317	0.00325322	24Zn/24Fe
6HL	MLOC_46977	Peroxisome biogenesis protein 19-1-like; contributes to morphology determination of peroxisomes, but not to import of peroxisomal matrix proteins. Required for proper post-translational import and stabilization of peroxisomal membrane proteins (PMPs). Acts as a cytosolic import receptor for PMPs and delivers them to the docking factor PEX3 at the peroxisomal membrane for subsequent insertion into…	Brachypodium distachyon	XLOC_091715	TCONS_00153826	-9.20392	9.56e-05	24Zn/24Fe
6HL	MLOC_38244	Uncharacterized		XLOC_091786	TCONS_00154025	7.75976	0.00193549	24Zn/24Fe
6HL	XLOC_092302	AP-1 complex subunit gamma-2-like; subunit of clathrin-associated adaptor protein complex 1 that plays a role in protein sorting in the late-Golgi/trans-Golgi network (TGN) and/or endosomes. The AP complexes mediate both the recruitment of clathrin to membranes and the recognition of sorting signals within the cytosolic tails of transmembrane cargo molecules.	Brachypodium distachyon	XLOC_092302	TCONS_00155192	-4.49953	0.00293093	24Zn/24Fe
6HS	MLOC_7517	Galactosyltransferase B1; involved in the galactosylation	Triticum aestivum	XLOC_095285	TCONS_00158346	-8.79946	0.000213553	24Zn/24Fe
6HS	MLOC_15743	Mitochondrial substrate carrier family protein B (mcfB)-like; calcium-dependent mitochondrial solute carrier. Mitochondrial solute carriers shuttle metabolites, nucleotides, and cofactors through the mitochondrial inner membrane	Brachypodium distachyon	XLOC_095311	TCONS_00158404	7.56045	0.00325322	24Zn/24Fe
6HS	MLOC_75424	Uncharacterized		XLOC_095319	TCONS_00158429	6.66636	0.000513942	24Zn/24Fe
6HS	MLOC_67722	GDSL esterase/lipase; these lipases are potentially involved in multiple physiological roles including seed germination, flowering and defense reactions (Pak J Biol Sci 2008, 11:763-7). They are predicted to be extracellularly secreted, or target to mitochondria, chloroplast or any other parts of the cells.	Aegilops tauschii	XLOC_095360	TCONS_00158579	8.11195	0.00103193	24Zn/24Fe
6HS	MLOC_44271	Mitogen-activated protein kinase 3, OsMAP3, OsMAPK2; OsMAPK2 mRNA level rapidly declined in rice cell challenged by high temperature. A similarly rapid response of OsMAPK2 was observed in stress-treated seedlings, demonstrating that response of the MAPK pathway occurs also in intact plants. These results suggest that this OsMAPK2 may function in the stress-signalling pathway as well as panicle de…	Triticum urartu	XLOC_095367	TCONS_00158595	-9.61835	3.92e-05	24Zn/24Fe
6HS	XLOC_095381	Peroxisomal membrane protein PMP22-like; may be involved in the metabolism of reactive oxygen species.	Brachypodium distachyon	XLOC_095381	TCONS_00158627	-7.43642	0.00466387	24Zn/24Fe
6HS	XLOC_095463	Uncharacterized		XLOC_095463	TCONS_00158797	-8.25446	0.000823026	24Zn/24Fe
6HS	MLOC_43983	F-box/kelch-repeat protein At3g06240-like; likely is a component of E3 ubiquitin ligase complexes, which may mediate the ubiquitination and subsequent proteasomal degradation of target proteins	Brachypodium distachyon	XLOC_095677	TCONS_00159276	5.8182	0.00114352	24Zn/24Fe
6HS	MLOC_7525	Alkaline/neutral invertase CINV2-like; cytosolic invertase that may cleave sucrose into glucose and fructose, and that is involved in the regulation of root growth. May regulate sugar-mediated root development by controlling sucrose catabolism in root cells (Proc Natl Acad Sci USA 2009, 106:13124-13129).	Setaria italica	XLOC_095681	TCONS_00159297	7.13777	0.00735175	24Zn/24Fe
6HS	MLOC_65966	MADS-box transcription factor 29; MIKC-type MADS involved in seed development. Symplastic continuity, including the ovular vascular trace and the nucellar projection, which is the nutrient source for the filial tissue at early development stages is regulate by MADS29 (PLoS One 2012, 7:e51435). The MADS box transcription factors are critical regulators of rice (Oryza sativa) reproductive developme…	Aegilops tauschii	XLOC_095694	TCONS_00159364	-9.07058	0.000139614	24Zn/24Fe
chr7	MLOC_12447	Protein argonaute 1B; as part of the RNA-induced silencing complex (RISC) the endonuclease plays a key role in the RNA interference pathway. It respond to auxin stimulus.	Aegilops tauschii	XLOC_099049	TCONS_00163251	8.28823	0.000737145	24Zn/24Fe
chr7	MLOC_51889	Syntaxin-43, SYP43; involved in vesicle trafficking protein that functions in the secretory pathway.	Triticum urartu	XLOC_099051	TCONS_00163258	4.8063	0.00331366	24Zn/24Fe
chr7	MLOC_51889	Syntaxin-43, SYP43; involved in vesicle trafficking protein that functions in the secretory pathway.	Triticum urartu	XLOC_099051	TCONS_00163260	-8.76002	0.00024749	24Zn/24Fe
chr7	MLOC_13047	Putative LRR receptor-like serine/threonine-protein kinase; see BMC Genomics 2010, 11:19.	Aegilops tauschii	XLOC_099100	TCONS_00163369	-7.1817	0.00735175	24Zn/24Fe
chr7	MLOC_72100	Alpha-1,2-galactosyltransferase gmh3; involved in the galactosylation of the N-linked core oligosaccharide Man9GlcNAc2.	Brachypodium distachyon	XLOC_099211	TCONS_00163692	-8.56022	0.0003916	24Zn/24Fe
chr7	MLOC_53933	Compartment-specific (cytosolic) synthesis of phosphatidylethanolamine is required for normal heavy metal resistance likely important for maintenance of vacuolar PE levels (Molecular Biology of the Cell 2010, 21:443-455).	Triticum aestivum	XLOC_099312	TCONS_00164101	8.96687	0.000143192	24Zn/24Fe
chr7	MLOC_6299	Acyl-coenzyme A oxidase 2 (ACX2), peroxisomal; Catalyzes the desaturation of long-chain acyl-CoAs to 2-trans-enoyl-CoAs. Active on substrates longer than C14 and mostly with C18-CoA. Activity on long-chain mono-unsaturated substrates is double than with the corresponding saturated substrates. Induced by seed imbibition with a peak at day 2 and then declines steadily until day 8. (Plant J 1999, 20…	Aegilops tauschii	XLOC_099329	TCONS_00164164	-9.82357	3.05e-05	24Zn/24Fe
chr7	MLOC_56083	Uncharacterized		XLOC_099400	TCONS_00164461	-7.33271	0.00538066	24Zn/24Fe
chr7	MLOC_72171	Sister chromatid cohesion PDS5-B-B-like protein; plays a role in androgen-induced proliferative arrest. Required for maintenance of sister chromatid cohesion during mitosis.	Aegilops tauschii	XLOC_099508	TCONS_00164865	-8.59051	0.000417108	24Zn/24Fe
chr7	MLOC_61919	Zinc finger protein CONSTANS-LIKE 9, COL9; this gene belongs to the CO (CONSTANS) gene family. This gene family is divided in three subgroups: groups III, to which COL9 belongs, is characterised by one B-box (supposed to regulate protein-protein interactions) and a second diverged zinc finger. COL9 downregulates expression of CO (CONSTANS) as well as FT and SOC1 which are known regulatory targets…	Triticum urartu	XLOC_099532	TCONS_00164981	-7.40267	0.00501406	24Zn/24Fe
chr7	MLOC_80839	Putative DNA repair protein RAD23; involved in nucleotide excision repair (see Plant J 1998, 13: 815-821). Binds and presumably selects ubiquitin-conjugates for destruction. Prefers multiubiquitin chains rather than single ubiquitins, with a binding affinity for 'Lys-48'-linked ubiquitin chains. Acts as an ubiquitin receptor that associates with the 26S proteasomal docking subunit RPN10 for the i…	Aegilops tauschii	XLOC_099580	TCONS_00165171	-8.85042	0.000225769	24Zn/24Fe
chr7	MLOC_80839	Putative DNA repair protein RAD23; involved in nucleotide excision repair (see Plant J 1998, 13: 815-821). Binds and presumably selects ubiquitin-conjugates for destruction. Prefers multiubiquitin chains rather than single ubiquitins, with a binding affinity for 'Lys-48'-linked ubiquitin chains. Acts as an ubiquitin receptor that associates with the 26S proteasomal docking subunit RPN10 for the i…	Aegilops tauschii	XLOC_099580	TCONS_00165173	-8.82516	0.000239198	24Zn/24Fe
chr7	MLOC_80839	Putative DNA repair protein RAD23; involved in nucleotide excision repair (see Plant J 1998, 13: 815-821). Binds and presumably selects ubiquitin-conjugates for destruction. Prefers multiubiquitin chains rather than single ubiquitins, with a binding affinity for 'Lys-48'-linked ubiquitin chains. Acts as an ubiquitin receptor that associates with the 26S proteasomal docking subunit RPN10 for the i…	Aegilops tauschii	XLOC_099580	TCONS_00165174	-9.43016	6.42e-05	24Zn/24Fe
chr7	MLOC_15070	CUGBP Elav-like family member 4-like isoform X2, snRNA binding mRNA splicing protein via spliceosome; RNA-binding protein implicated in the regulation of several post-transcriptional events. It is involved in pre-mRNA alternative splicing, mRNA translation and stability.	Setaria italica	XLOC_099774	TCONS_00165904	-7.09982	0.00981023	24Zn/24Fe
chr7	XLOC_099842	Probable RNA polymerase II transcription factor B subunit 1-1-like; acts as component of the general transcription and DNA repair factor IIH (TFIIH) core, which is essential for both basal and activated transcription, and is involved in nucleotide excision repair (NER) of damaged DNA.	Brachypodium distachyon	XLOC_099842	TCONS_00166117	-7.76334	0.00201336	24Zn/24Fe
chr7	CCA1	DNA binding, circadian clock associated 1 that can promote early flowering		XLOC_099865	TCONS_00166188	-10.784	3.48e-06	24Zn/24Fe
chr7	MLOC_56091	LHP1-INTERACTING FACTOR 2, LIF2; Involved in fatty acid beta-oxidation		XLOC_099897	TCONS_00166278	-8.19655	0.000966986	24Zn/24Fe
chr7	MLOC_2575	Putative phagocytic receptor 1b (phg1b); phagocytosis of apoptotic cells is an indispensable part of the cell death program (PLoS Genet, 9: e1003517). Clathrin and the multi-subunit adaptor protein complex AP2 are central players in clathrin-mediated endocytosis by which the cell selectively internalizes surface materials. Here, we report the essential role of clathrin and AP2 in phagocytosis of …	Aegilops tauschii	XLOC_099905	TCONS_00166317	-9.94578	2.81e-05	24Zn/24Fe
chr7	MLOC_69284	Involved in N-terminal protein myristoylation	Arabidopsis	XLOC_099938	TCONS_00166426	7.39909	0.00538066	24Zn/24Fe
chr7	MLOC_55588	Phosphatidylinositol 4-kinase type 2-beta (pi4k2b); contributes to the overall PI4-kinase activity of the cell. The phosphorylation of phosphatidylinositol (PI) to PI4P is the first committed step in the generation of phosphatidylinositol 4,5-bisphosphate (PIP2), a precursor of the second messenger inositol 1,4,5-trisphosphate (InsP3)	Aegilops tauschii	XLOC_099959	TCONS_00166512	-8.29181	0.000795144	24Zn/24Fe
chr7	MLOC_6482	HEAT repeat-containing protein 5B-like, similar to putative E2 ubiquitin-protein ligase UBC11 (see PNAS 2006, 103:51-56).	Brachypodium distachyon	XLOC_099970	TCONS_00166561	7.0535	0.00886598	24Zn/24Fe
chr7	MLOC_51014	Uncharacterized		XLOC_100156	TCONS_00167249	7.78611	0.00185523	24Zn/24Fe
chr7	MLOC_34521	G-type lectin S-receptor-like serine/threonine-protein kinase At2g19130-like; GsSRK was identified as an alkaline (NaHCO3)-responsive gene, and was subsequently isolated from Glycine soja. induced by ABA, salt, and drought stresses. Over expression of GsSRK in Arabidopsis promoted seed germination, as well as primary root and rosette leaf growth during the early stages of salt stress. Compared to…	Brachypodium distachyon	XLOC_100219	TCONS_00167525	-5.28316	0.00215702	24Zn/24Fe
chr7	MLOC_4670	IDN2, Involved in De Novo 2, RDM12, RNA-DIRECTED DNA METHYLATION 12	Brachypodium distachyon	XLOC_100456	TCONS_00168367	-5.18115	0.00611695	24Zn/24Fe
chr7	MLOC_5597	Transcription factor ASG4-like, ALTERED SEED GERMINATION 4; Myb transcription factor upregulated by ABA and involved in abiotic response (The Plant Journal 2004, 38:381-395).	Setaria italica	XLOC_100633	TCONS_00169008	8.95531	0.000156805	24Zn/24Fe
chr7	MLOC_5597	Transcription factor ASG4-like, ALTERED SEED GERMINATION 4; Myb transcription factor upregulated by ABA and involved in abiotic response (The Plant Journal 2004, 38:381-395).	Setaria italica	XLOC_100633	TCONS_00169010	-3.35755	0.00934634	24Zn/24Fe
chr7	MLOC_77829	Acyl-CoA synthetase family member 4; Acyl-CoA synthases catalyze the initial reaction in fatty acid metabolism, by forming a thioester with CoA. Acyl-CoA is a group of coenzymes involved in the metabolism of fatty acids. It is a temporary compound formed when coenzyme A (CoA) attaches to the end of a long-chain fatty acid inside living cells. The compound undergoes beta oxidation, forming one or …	Triticum urartu	XLOC_100647	TCONS_00169070	-8.09455	0.00103193	24Zn/24Fe
chr7	MLOC_76489	SRL1; encodes a putative splicing factor. Over-expression in yeast and Arabidopsis result in increased tolerance to high salt.	Arabidopsis	XLOC_100785	TCONS_00169511	7.21738	0.00676821	24Zn/24Fe
chr7	MLOC_57802	S-adenosylmethionine-dependent methyltransferase; methylation of small molecules and macromolecules is crucial in metabolism, cell signaling, and epigenetic programming and is most often achieved by S-adenosylmethionine (SAM)-dependent methyltransferases. (Science. 2011 Apr 29;332(6029):604-7). These enzymes use AdoMet to methylate a wide variety of molecular targets, including DNA, RNA, proteins…	Zea mays	XLOC_100899	TCONS_00169865	4.85475	0.00644441	24Zn/24Fe
chr7	MLOC_57802	S-adenosylmethionine-dependent methyltransferase; methylation of small molecules and macromolecules is crucial in metabolism, cell signaling, and epigenetic programming and is most often achieved by S-adenosylmethionine (SAM)-dependent methyltransferases. (Science. 2011 Apr 29;332(6029):604-7). These enzymes use AdoMet to methylate a wide variety of molecular targets, including DNA, RNA, proteins…	Zea mays	XLOC_100899	TCONS_00169869	-7.09982	0.00886598	24Zn/24Fe
chr7	MLOC_44066	Serine/threonine-protein kinase CTR1; acts as a negative regulator in the ethylene response pathway (Cell 1993, 72:427-41). CTR1 interacts with ethylene receptor ETR1 in vivo, and that this association is required to turn off the ethylene-signaling pathway (Plant J 2003, 33:221-33).	Triticum urartu	XLOC_100967	TCONS_00170153	-5.81573	0.00283884	24Zn/24Fe
chr7	MLOC_57064	S-locus lectin protein kinase family protein, Putative receptor kinase 5; a Serine/threonine-protein kinase that may function as a signaling receptor of extracellular matrix component. Involved in ethylene biosynthetic process, protein phosphorylation, and recognition of pollen.	Oryza sativa	XLOC_100995	TCONS_00170269	7.59067	0.00289516	24Zn/24Fe
chr7	MLOC_72152	RNA-binding (RRM/RBD/RNP motifs) family protein; involved in mRNA splicing, via spliceosome.	Aegilops tauschii	XLOC_101118	TCONS_00170692	-7.76334	0.00225751	24Zn/24Fe
chr7	MLOC_72152	RNA-binding (RRM/RBD/RNP motifs) family protein; involved in mRNA splicing, via spliceosome.	Aegilops tauschii	XLOC_101118	TCONS_00170694	8.97834	0.000155726	24Zn/24Fe
chr7	MLOC_64842	Pollen-specific protein SF3; could possibly involved in controlling pollen-specific processes such as male gamete maturation, pollen tube formation, or even fertilization. May involved in actin filament bundle assembly, cellular membrane fusion	Aegilops tauschii	XLOC_101125	TCONS_00170724	-6.96757	0.00418535	24Zn/24Fe
chr7	MLOC_55934	Phosphatidylinositol 4-kinase type 2-beta; together with PI4K2A and the type III PI4Ks (PIK4CA and PIK4CB) it contributes to the overall PI4-kinase activity of the cell. This contribution may be especially significant in plasma membrane, endosomal and Golgi compartments. The phosphorylation of phosphatidylinositol (PI) to PI4P is the first committed step in the generation of phosphatidylinositol …	Aegilops tauschii	XLOC_101199	TCONS_00171055	8.26967	0.000737145	24Zn/24Fe
chr7	MLOC_3523	CDK5RAP3-like protein; putative regulator of Cyclin-dependent kinase 5 which could be affected by nitrosylation (PNAS 2011, 108:14330-14335). S-nitrosylation of Cdk5 contributes to amyloid-β (Aβ) peptide-induced dendritic spine loss. Furthermore, significant levels of SNO-Cdk5 in postmortem Alzheimer’s disease (AD) but not in normal human brains (PNAS 2011, 108:14330-14335).	Brachypodium distachyon	XLOC_101253	TCONS_00171287	-8.49765	0.00046286	24Zn/24Fe
chr7	MLOC_14721	Uncharacterized		XLOC_101271	TCONS_00171373	-7.22096	0.00735175	24Zn/24Fe
chr7	MLOC_5322	Putative phosphatidylinositol/phosphatidylcholine transfer protein; a member of alpha-tocopherol transport family proteins, alpha-tocopherol is a major lipid-soluble anti-oxidant. Involved in alpha-tocopherol secretion (see Genes Cells. 2003 Oct;8(10):789-800).	Oryza sativa	XLOC_101275	TCONS_00171386	8.19296	0.000795144	24Zn/24Fe
chr7	MLOC_5322	Putative phosphatidylinositol/phosphatidylcholine transfer protein; a member of alpha-tocopherol transport family proteins, alpha-tocopherol is a major lipid-soluble anti-oxidant. Involved in alpha-tocopherol secretion (see Genes Cells. 2003 Oct;8(10):789-800).	Oryza sativa	XLOC_101275	TCONS_00171391	-8.89964	0.000172526	24Zn/24Fe
chr7	MLOC_16321	Evolutionary conserved C-terminal region 5; uncharacterized	Triticum urartu	XLOC_101298	TCONS_00171497	7.00944	0.00981023	24Zn/24Fe
chr7	MLOC_64607	Cation-chloride cotransporter 1-like; cation/chloride cotransporter that mediates potassium-chloride and sodium-chloride cotransports. Involved in plant development and Cl- homeostasis. May be involved in long distance Cl- transport. Does not function as an H+-dependent cotransporter (Plant J 2007, 50:278-92)	Brachypodium distachyon	XLOC_101325	TCONS_00171611	7.36453	0.00501406	24Zn/24Fe
chr7	MLOC_12559	HAK26, Potassium transporter 26; it covers from 350th to 500th amino acids of the full version of the enzyme 752 amino acids. It has a chloroplast localization signal peptide predicted by PlantLoc server.	Aegilops tauschii	XLOC_101326	TCONS_00171626	7.49806	0.00403395	24Zn/24Fe
chr7	MLOC_14139	WD repeat-containing protein DWA2; component of the CUL4-RBX1-DDB1-DWA1/DWA2 E3 ubiquitin-protein ligase complex that acts as negative regulator in abscisic acid (ABA) signaling. May function as the substrate recognition module within this complex leading to ABI5 degradation (Plant Cell 2010, 22:1716-1732). This isoform has GOL/NUC/VAC signal peptides.	Brachypodium distachyon	XLOC_101377	TCONS_00171800	7.46582	0.00434145	24Zn/24Fe
chr7	MLOC_14139	WD repeat-containing protein DWA2; component of the CUL4-RBX1-DDB1-DWA1/DWA2 E3 ubiquitin-protein ligase complex that acts as negative regulator in abscisic acid (ABA) signaling. May function as the substrate recognition module within this complex leading to ABI5 degradation (Plant Cell 2010, 22:1716-1732). This isoform has Nuclear signal peptide.	Brachypodium distachyon	XLOC_101377	TCONS_00171802	-7.68127	0.00271588	24Zn/24Fe
chr7	MLOC_5986	Shrubby; Encodes a vacuolar sorting protein that interacts with the plant-specific GRAS family transcription factor SHORT-ROOT and acts in a pathway that controls root growth and radial patterning. It provides a connections between gibberellic acid, SHR and PLT signaling in the root.	Brachypodium distachyon	XLOC_101455	TCONS_00172030	8.47799	0.000435523	24Zn/24Fe
chr7	MLOC_73081	ACT domain-containing protein, ACR11; ACR11 putative amino acid sensor proteins in the chloroplast which coexpressed with the chloroplastic glutamine synthetase and induced by light and sucrose (BMC Plant Biol 2011,11:118). The strong accumulation of the ACR11 (At1g16880) gene product during cold acclimation suggests that this protein, together with plant PIIs, may play a role in sensing the meta…	Arabidopsis thaliana	XLOC_101474	TCONS_00172098	7.9111	0.00143305	24Zn/24Fe
chr7	MLOC_37025	ENHANCER OF AG-4 2, HUA2, Weakly similar to Tudor/PWWP/MBT domain-containing protein, putative isoform 2; it has the domain RPR present in proteins, which are involved in regulation of nuclear pre-mRNA. In arabidopsis, is a putative transcription factor. Member of the floral homeotic AGAMOUS pathway.Mutations in HUA enhance the phenotype of mild ag-4 allele. Single hua mutants are early flowering…	Setaria italica, Theobroma cacao	XLOC_101584	TCONS_00172486	7.46582	0.00466387	24Zn/24Fe
chr7	MLOC_34851	Hydrolase, alpha/beta fold family protein; Alpha/beta hydrolases function as hydrolases, lyases, transferases, hormone precursors or transporters, chaperones or routers of other proteins (see Chem Biol Interact 2013, 203:266-8).	Zea mays	XLOC_101631	TCONS_00172683	-9.79784	3.05e-05	24Zn/24Fe
chr7	MLOC_69519	Brefeldin A-inhibited guanine nucleotide-exchange protein 2 (ARFGEF2); ADP-ribosylation factor guanine nucleotide-exchange factor 2; in human it promotes guanine-nucleotide exchange on ARF1 and ARF3 and to a lower extend on ARF5 and ARF6. Promotes the activation of ARF1/ARF5/ARF6 through replacement of GDP with GTP. Involved in the regulation of Golgi vesicular transport. Required for the integri…	Triticum urartu	XLOC_101747	TCONS_00173141	8.42866	0.000585718	24Zn/24Fe
chr7	MLOC_74354	Reticuline oxidase-like protein; a cell membrane, lipid-anchor (GPI-anchor), and secreted protein involved in response to oxidative stress.	Aegilops tauschii	XLOC_101757	TCONS_00173178	5.041	0.00538066	24Zn/24Fe
chr7	MLOC_57343	G-type lectin S-receptor-like serine/threonine-protein kinase At2g19130; induced by ABA, salt, and drought stresses in Glycine soja. Its overexpression in Arabidopsis, enhances salt tolerance and higher yields under salt stress, with higher chlorophyll content, lower ion leakage, higher plant height, and more siliques at the adult developmental stage (J Plant Physiol 2013, 170:505-15).	Brachypodium distachyon	XLOC_101826	TCONS_00173412	-8.11554	0.0011253	24Zn/24Fe
chr7	MLOC_44439	TAFII59, TATA BOX ASSOCIATED FACTOR II 59; involved in transcription and splicing	Arabidopsis, Aegilops tauschii	XLOC_101830	TCONS_00173452	7.78611	0.00185523	24Zn/24Fe
chr7	MLOC_63123	Protein SRG1, Protein SENESCENCE-RELATED GENE 1, probable iron/ascorbate oxidoreductase DDB_G0283291; highly induced during normal senescence (Plant Physiol 1997, 115:1385-1395) and by virus infection (Plant J 2003, 33:271-283).	Aegilops tauschii	XLOC_101835	TCONS_00173469	7.62026	0.00325322	24Zn/24Fe
chr7	MLOC_53744	NAC domain-containing protein 21/22 (NAC022, NAC021, NAC1); induced by auxin and is a transcriptional activator that mediates auxin signaling to promote lateral root development. Activates the expression of two downstream auxin-responsive genes, DBP and AIR3.	Triticum urartu	XLOC_101946	TCONS_00173847	8.47799	0.000448772	24Zn/24Fe
chr7	XLOC_102179	Thaumatin-like protein PWIR2, Pathogenesis-related protein 1; probably involved in the defense reaction of plants against pathogens.		XLOC_102179	TCONS_00174605	-5.31704	0.00193549	24Zn/24Fe
7HL	MLOC_76567	E3 ubiquitin-protein ligase MARCH6-like; E3 ubiquitin-protein ligase. E3 ubiquitin ligases accept ubiquitin from an E2 ubiquitin-conjugating enzyme in the form of a thioester and then directly transfer the ubiquitin to targeted substrates.	Brachypodium distachyon	XLOC_108175	TCONS_00180784	-8.66357	0.000299092	24Zn/24Fe
7HL	GER3A	Apoplastic manganese ion binding protein (cu,zn-superoxide dismutase activity), germin-like protein 3a; may involved in response to various abiotic stresses (including salt, H2O2 stress and wound), biotic stresses (including leaf spot, mosaic and rust)[PLoS One 2013, 8:e61722]. This could be by superoxide dismutase activity (Int J Mol Sci 2011, 12,7301-7313).		XLOC_108205	TCONS_00180858	-8.15661	0.00103193	24Zn/24Fe
7HL	XLOC_108276	Uncharacterized		XLOC_108276	TCONS_00181123	7.78611	0.00213551	24Zn/24Fe
7HL	XLOC_108700	Uncharacterized		XLOC_108700	TCONS_00182168	7.17812	0.00735175	24Zn/24Fe
7HL	MLOC_69344	26S protease regulatory subunit 8 homolog A-like, RPT6A, SUG1; the 26S protease is involved in the ATP-dependent degradation of ubiquitinated proteins. The regulatory (or ATPase) complex confers ATP dependency and substrate specificity to the 26S complex.	Brachypodium distachyon	XLOC_108738	TCONS_00182307	-7.7365	0.00213551	24Zn/24Fe
7HL	MLOC_65385	Vesicle-associated protein 1-3, VAMP-associated protein 1-3, PVA13; involved in vesicle trafficking.	Triticum urartu	XLOC_108752	TCONS_00182359	7.09625	0.00805497	24Zn/24Fe
7HL	MLOC_8254	Irregular xylem 14 homolog; involved in cell wall organization.	Brachypodium distachyon	XLOC_108851	TCONS_00182677	7.8624	0.00193549	24Zn/24Fe
7HL	MLOC_31283	CYP89A2	Aegilops tauschii	XLOC_108946	TCONS_00182913	-8.21611	0.000857393	24Zn/24Fe
7HL	XLOC_108950	Putative calmodulin binding transporter protein, Cyclic nucleotide-gated ion channel 1, Cyclic nucleotide- and calmodulin-regulated ion channel 1, CNGC1; acts as cyclic nucleotide-gated ion channel. Can be activated by cyclic AMP which leads to an opening of the cation channel. May be responsible for cAMP-induced calcium entry in cells and thus should be involved in the calcium signal transductio…	Aegilops tauschii	XLOC_108950	TCONS_00182924	8.28823	0.000737145	24Zn/24Fe
7HS	MLOC_22004	Uncharacterized		XLOC_112589	TCONS_00187013	8.32464	0.000607715	24Zn/24Fe
7HS	MLOC_62700	Hydroxymethylglutaryl-CoA synthase-like; HMG-CoA synthase EC 2.3.3.10 is an enzyme which catalyzes the reaction in which Acetyl-CoA condenses with acetoacetyl-CoA to form 3-hydroxy-3-methylglutaryl-CoA (HMG-CoA). It is the second reaction in the mevalonate-dependent isoprenoid biosynthesis pathway. HMG-CoA is an intermediate in both cholesterol synthesis and ketogenesis. The terpenoids sometimes …	Brachypodium distachyon	XLOC_113029	TCONS_00187972	-7.36811	0.00466387	24Zn/24Fe
7HS	MLOC_62700	Hydroxymethylglutaryl-CoA synthase-like; HMG-CoA synthase EC 2.3.3.10 is an enzyme which catalyzes the reaction in which Acetyl-CoA condenses with acetoacetyl-CoA to form 3-hydroxy-3-methylglutaryl-CoA (HMG-CoA). It is the second reaction in the mevalonate-dependent isoprenoid biosynthesis pathway. HMG-CoA is an intermediate in both cholesterol synthesis and ketogenesis. The terpenoids sometimes …	Brachypodium distachyon	XLOC_113029	TCONS_00187975	-9.44681	5.4e-05	24Zn/24Fe
7HS	MLOC_71007	Pentatricopeptide repeat-containing protein At5g65560-like	Brachypodium distachyon	XLOC_113106	TCONS_00188229	-7.53317	0.00350986	24Zn/24Fe
7HS	MLOC_38674	Uncharacterized		XLOC_113177	TCONS_00188438	5.96486	0.00219472	24Zn/24Fe
7HS	MLOC_66663	Sec34-like family protein; Involved in intracellular protein transport.	Arabidopsis	XLOC_113295	TCONS_00188687	-8.19655	0.000966986	24Zn/24Fe
morex_contig_150169	XLOC_118602	NADH-ubiquinone oxidoreductase fe-s protein, NADH dehydrogenase [ubiquinone] iron-sulfur protein 2-like, Mitochondrial; is highly conserved among eukaryotes and prokaryotes and contains 2 4Fe4S ferredoxin consensus patterns, which appear to provide the binding sites for the iron-sulfur cluster N-2. The inner membranes of mitochondria contain three multi-subunit enzyme complexes that act successiv…	Ricinus communis	XLOC_118602	TCONS_00194301	-9.02694	0.000147561	24Zn/24Fe
morex_contig_158736	MLOC_19965	Putative serine incorporator (serinc); ER membrane localized. Enhances the incorporation of serine into phosphatidylserine and sphingolipids, involved in lipid and phospholipid biosynthesis.	Triticum urartu	XLOC_119544	TCONS_00195435	-10.4745	5.74e-06	24Zn/24Fe
morex_contig_2547534	MLOC_36948	Metal transporter Nramp2-like, metal transporter Nramp6-like; this isoform codes for a vacuolar localized Nramp.	Brachypodium distachyon	XLOC_125068	TCONS_00201514	-7.14134	0.00805497	24Zn/24Fe
morex_contig_53318	MLOC_67596	Splicing factor U2af large subunit A; splicing factors SF1 and U2AF associate cooperatively with pre-mRNA and play a crucial role in 3 splice site recognition during early steps of spliceosome assembly. Formation of the active spliceosome subsequently displaces SF1 in a remodeling process that stabilizes the association of U2 snRNP with pre-mRNA (MOLECULAR AND CELLULAR BIOLOGY 2008, 28:3045-3057).	Triticum urartu	XLOC_128399	TCONS_00205410	-7.36811	0.00466387	24Zn/24Fe
morex_contig_53318	MLOC_67596	Splicing factor U2af large subunit A; splicing factors SF1 and U2AF associate cooperatively with pre-mRNA and play a crucial role in 3 splice site recognition during early steps of spliceosome assembly. Formation of the active spliceosome subsequently displaces SF1 in a remodeling process that stabilizes the association of U2 snRNP with pre-mRNA (MOLECULAR AND CELLULAR BIOLOGY 2008, 28:3045-3057).	Triticum urartu	XLOC_128399	TCONS_00205413	-7.4694	0.00403395	24Zn/24Fe
morex_contig_91486	snoZ118	ncRNA_2697		XLOC_129628	TCONS_00206977	-8.11554	0.0011253	24Zn/24Fe
chr1	MLOC_64273	Gamma 1 hordein; with alpha-amylase binding inhibitor sites. A role for gamma 3 hordein in the transport and targeting of prolamin polypeptides to the vacuole of developing barley endosperm (Plant J 1993, 4:841-53; The Plant Cell 2011, 23:2 769-784).		XLOC_000021		-1.62132	0.0068521	24Zn/24Fe
chr1	XLOC_000024	B hordein		XLOC_000024		-2.13724	3.3e-07	24Zn/24Fe
chr1	MLOC_46003	B1-hordein; sulfur-rich seed storage protein		XLOC_000025		-2.32217	1.01e-08	24Zn/24Fe
chr1	XLOC_000162	Uncharacterized		XLOC_000162		-5.98093	3.06e-11	24Zn/24Fe
chr1	MLOC_43759	Putative protease inhibitor		XLOC_000830		-4.81651	8.15e-13	24Zn/24Fe
chr1	MLOC_44740	Beta-hordothionin; thionins are small antimicrobial secreted plant proteins. They seem to exert their toxic effect at the level of the cell membrane. Their precise function is not known.		XLOC_001293		-1.65036	0.000326066	24Zn/24Fe
chr1	MLOC_61554	S-type anion channel SLAH2; slow, weak voltage-dependent S-type anion efflux channel involved in maintenance of anion homeostasis. Involved in efflux of osmoregulatory anions (Cl- and malate(2-)) and stomatal closure (Nature 2008, 452:483-6).	Triticum urartu	XLOC_001361		1.6632	0.00494179	24Zn/24Fe
chr1	XLOC_001434	Glucan 1,3-beta-glucosidase, Exo-1,3-beta-glucanase 1, Exo-1,3-beta-glucanase A, EXG1; Beta-glucanases participate in the metabolism of beta-glucan, the main structural component of the cell wall. It could also function biosynthetically as a transglycosylase. Successive hydrolysis of beta-D-glucose units from the non-reducing ends of (1->3)-beta-D-glucans, releasing alpha-glucose. The combination…	Aegilops tauschii	XLOC_001434		2.80663	4.58e-07	24Zn/24Fe
chr1	XLOC_001439	B1 hordein		XLOC_001439		-2.42822	5.24e-09	24Zn/24Fe
chr1	XLOC_001567	Ubiquitin carboxyl-terminal hydrolase Family member; A subfamily of Peptidase C19. Peptidase C19 contains ubiquitinyl hydrolases. They are intracellular peptidases that remove ubiquitin molecules from polyubiquinated peptides by cleavage of isopeptide bonds. They hydrolyze bonds involving the carboxyl group of the C-terminal Gly residue of ubiquitin. The purpose of the de-ubiquitination is though…	Aegilops tauschii	XLOC_001567		-5.76535	5.55e-10	24Zn/24Fe
chr1	XLOC_001568	Uncharacterized		XLOC_001568		-2.68432	0.000571872	24Zn/24Fe
chr1	MLOC_66415	Phosphoethanolamine N-methyltransferase 1 (NMT1); catalyzes N-methylation of phosphoethanolamine, phosphomonomethylethanolamine and phosphodimethylethanolamine, the three methylation steps required to convert phosphoethanolamine to phosphocholine.	Aegilops tauschii	XLOC_002481		1.64828	0.00218222	24Zn/24Fe
chr1	MLOC_22225	Alpha-hordothionin; thionins are small plant proteins which are toxic to animal cells. They seem to exert their toxic effect at the level of the cell membrane. Their precise function is not known (Eur J Biochem 1986 156:131-5; Biotechnol Lett 2013, 35:1085-91.).		XLOC_002659		-1.43411	0.00232309	24Zn/24Fe
chr1	XLOC_002772	Fatty acyl-CoA reductase 1, FAR1; involved in response to salt stress, response to wounding, suberin biosynthetic process. Catalyzes the reduction of fatty acyl-CoA to fatty alcohols. Very long chain primary alcohols are significant components in cuticle waxes of plants. Fatty acyl-CoA reductases (FARs) catalyze the formation of a fatty alcohol from an acyl-CoA (J Plant Physiol 2009, 166:787-96).	Aegilops tauschii	XLOC_002772		-5.15075	2.51e-10	24Zn/24Fe
chr1	XLOC_002810	Gamma 3 hordein; has a role in the transport and targeting of prolamins to the vacuole of developing barley endosperm.		XLOC_002810		-1.90143	0.000814892	24Zn/24Fe
1H	MLOC_11548	NADP-Malic enzyme 3; Catalyzes the oxidative decarboxylation of malate to pyruvate using either NAD+ or NADP+ as a cofactor. Involved in gluconeogenesis. Predicted to be cytosolic/chloroplastic. Plant Physiol. 1988 May;87(1):109-15. Oxaloacetate and malate transport by plant mitochondria.Zoglowek C1, Krömer S, Heldt HW.	Arabidopsis	XLOC_007350		-2.17545	0.00113812	24Zn/24Fe
1H	XLOC_007434	Putative ubiquitin carboxyl-terminal hydrolase; they recognize and hydrolyze the peptide bond at the C-terminal Gly of ubiquitin. Involved in the processing of poly-ubiquitin precursors as well as that of ubiquitinated proteins.	Aegilops tauschii	XLOC_007434		-4.25896	1.6e-05	24Zn/24Fe
1H	XLOC_007461	D hordein; hordein, as the main storage protein fraction in barley seeds, accounts for up to half of the total protein in the mature grains, and may be classified into four groups named B, C, D and γ hordeins based on their electrophoretic mobilities (Shewry et al., 1985). The B and C fractions account for 70%~80% and 10%~12%, respectively, of the total hordein, while the D and γ fractions are mi…		XLOC_007461		-1.37692	0.0093793	24Zn/24Fe
1H	RNAI	Uncharacterized		XLOC_008047		-2.37948	2.46e-09	24Zn/24Fe
1H	MLOC_67992	Photosystem I P700 chlorophyll A apoprotein A1; From 340th to 390th amino acid of the chloroplastic apoprotein A1. May be it is an RNA antisense! (there is a possibility of noncoding RNA trafficing inside the chloroplasts (see PloS ONE 2010, 5:e12269). It has a 150 bases long similarity with the gene and the rest of transcript is different and may be a signal sequence. Alsosee Nucleic Acids Resea…	Oryza sativa	XLOC_008568		-1.52702	0.00517369	24Zn/24Fe
1H	XLOC_008845	Uncharacterized		XLOC_008845		-3.08655	0.00203807	24Zn/24Fe
1H	XLOC_010917	Uncharacterized		XLOC_010917		-4.66353	1.56e-07	24Zn/24Fe
1H	XLOC_011276	B3-hordein		XLOC_011276		-1.54447	0.00232893	24Zn/24Fe
1H	XLOC_013250	C-hordein		XLOC_013250		-2.23476	9.11e-06	24Zn/24Fe
1H	XLOC_013925	Uncharacterized		XLOC_013925		-1.47227	0.00059977	24Zn/24Fe
1H	XLOC_014848	B3 hordein		XLOC_014848		-1.8287	0.000665981	24Zn/24Fe
1H	XLOC_014997	B3-hordein		XLOC_014997		-1.77271	0.00324479	24Zn/24Fe
1H	XLOC_015155	B3-hordein		XLOC_015155		-1.7082	0.00017795	24Zn/24Fe
1H	XLOC_015307	B3-hordein		XLOC_015307		-1.69164	0.000795445	24Zn/24Fe
chr2	MLOC_52930	Caleosin 3; Encodes a calcium binding protein whose mRNA is induced upon treatment with NaCl, ABA and in response to dessication. mRNA expression under drought conditions is apparent particularly in leaves and flowers. Isoform of caleosin with a role as a peroxygenase involved in oxylipin metabolism during biotic and abiotic stress. Involved in the production of 2-hydroxy-octadecatrienoic acid. T…	Brachypodium distachyon	XLOC_017188		-2.60757	0.00693814	24Zn/24Fe
chr2	MLOC_64248	Naringenin,2-oxoglutarate 3-dioxygenase, Flavanone-3-hydroxylase (FLS1), This enzyme participates in flavonoid biosynthesis. It has 2 cofactors: iron, and Ascorbate.		XLOC_017604		1.40501	0.00494179	24Zn/24Fe
chr2	XLOC_017615	Uncharacterized		XLOC_017615		-1.99765	0.00185963	24Zn/24Fe
chr2	XLOC_018523	Uncharacterized		XLOC_018523		-2.06885	0.00664696	24Zn/24Fe
chr2	HVHAK1	Potassium transporter 1 (HAK1); high-affinity potassium transporter, also transport rubidium, with the same affinity and cesium, with a lower affinity. There are 17 HAKs in rice. Experimentally checked, OsHAK1, OsHAK7, and OsHAK10, mediate K(+) influxes or effluxes, depending on the conditions of the experiment. A comparative kinetic analysis of HAK-mediated K(+) influx in yeast and in roots of K…	Aegilops tauschii	XLOC_018778		-2.72356	3.14e-05	24Zn/24Fe
chr2	XLOC_019431	Uncharacterized		XLOC_019431		-2.12183	0.000773757	24Zn/24Fe
chr2	XLOC_024234	Nodulin-like1, AT1G21140, Vacuolar iron transporter homolog 2-like, there is a gap at upstream genomic region.	Brachypodium distachyon	XLOC_024234		-4.54297	0.000477563	24Zn/24Fe
chr2	XLOC_024496	Photosystem I P700 apoprotein A2 (psaB), chloroplast	Ravenea hildebrandtii	XLOC_024496		-2.31589	0.000969266	24Zn/24Fe
2HL	MLOC_67489	L-allo-threonine aldolase; catalyzes L-allo-threonine = glycine + acetaldehyde (FEMS Microbiol Lett. 1997 Jun 15;151(2):245-8.). Glycine is not only an important cellular component but is also a precursor of cellular C, source. The glycine-forming pathway in Escherichia coli has been extensively studied, and serine hydroxymethyltransferase-catalyzed formation of glycine from serine has been concl…	Triticum urartu	XLOC_025685		-2.21092	0.00265539	24Zn/24Fe
2HL	XLOC_029614	Uncharacterized		XLOC_029614		-2.41722	0.00856895	24Zn/24Fe
2HS	XLOC_030479	Serine/threonine-protein kinase fray2	Triticum urartu	XLOC_030479		-2.21804	0.00296889	24Zn/24Fe
2HS	XLOC_033062	Uncharacterized		XLOC_033062		-2.09559	0.000406329	24Zn/24Fe
chr3	MLOC_65788	Dihydroflavonol-4-reductase; the first enzyme committed to anthocyanin biosynthesis in the flavonoid pathway and catalyzes the NADPH-dependent reduction of dihydroflavonols into leucoanthocyanidins. Anthocyanins, a type of flavonoid, are responsible for most pinks, reds, mauves and blues in flowers and fruits, where they serve as visual signals to recruit pollinators and seed dispersers (see Plan…	Triticum aestivum	XLOC_034815		1.84238	9.42e-05	24Zn/24Fe
chr3	MLOC_56891	Probable peptide/nitrate transporter At1g22540-like isoform 1, Major facilitator superfamily protein, Oligopeptide transporter	Brachypodium distachyon	XLOC_035238		1.96058	0.000406329	24Zn/24Fe
chr3	MLOC_25678, PAP-14	Papain-like cysteine proteinase, Vignain-like; Bean endopeptidase, Cysteine proteinase, Sulfhydryl-endopeptidase; thought to be involved in the hydrolysis of stored seed proteins (see FEBS Lett 1994, 351:31-4).	Setaria italica	XLOC_035361		1.59918	0.000571872	24Zn/24Fe
chr3	MLOC_70041	Uncharacterized		XLOC_035842		-5.78633	5.55e-10	24Zn/24Fe
chr3	MLOC_72048	LRR receptor-like serine/threonine-protein kinase At1g56130-like; may regulated by miR390 (Plant Cell. 2005 Jun;17(6):1658-73). May involved in transition from vegetative to reproductive growth nrgatively (The Plant Cell 2012, 24:4837-4849).	Brachypodium distachyon	XLOC_037094		-2.69978	0.00933093	24Zn/24Fe
chr3	MLOC_10758	HAK5, Potassium transporter 5-like isoform 1; plasma membrane localized. Salt tolerance mechanism mediated by HKT transporters: a mechanism for sodium exclusion and maintenance of high K+/Na+ ratio in leaves during salinity stres (Plant Cell and Environment 2010, 33:552–565; J Biosci Bioeng 2011, 111:346-56; Plant Physiologyr 2002, 130:784-795).	Brachypodium distachyon	XLOC_037152		-4.82118	8.26e-11	24Zn/24Fe
chr3	XLOC_040886	Uncharacterized		XLOC_040886		-2.07146	0.0026528	24Zn/24Fe
chr3	XLOC_041420	Uncharacterized		XLOC_041420		-1.47957	0.000571872	24Zn/24Fe
chr3	XLOC_042498	Photosystem II CP43 protein	Saxifraga rivularis	XLOC_042498		-1.61712	0.00312337	24Zn/24Fe
3HL	MLOC_51178	Hemerythrin-like domain containing protein, LOC_Os01g64250 homologue; hemerythrin (Hr) like domains have the same four alpha helix bundle and a similar, but slightly different active site structure than hemerythrin. They are non-heme diiron binding proteins mainly found in bacteria and eukaryotes. Like Hr, they may be involved in oxygen transport or like human FBXL5 (F-box and leucine-rich repeat…		XLOC_043087		-2.14186	3.41e-05	24Zn/24Fe
3HL	XLOC_043096	Uncharacterized		XLOC_043096		-1.34	0.0075611	24Zn/24Fe
3HL	XLOC_043635	Hordeum vulgare miR5049e family MIR5067; predicted targets includes Glutathione S-transferase GST 34 and TSI-1, CONSTANS-like protein CO5, Multidrug resistance protein 1 homolog, SOUL heme-binding protein-like, Phospholipid-hydroperoxide glutathione peroxidase, and Cinnamyl alcohol dehydrogenase (see Int J Mol Sci 2012, 13:2973-2984). Putitive miRNA; predicted by findMiRNA programm at http://linu…		XLOC_043635		-3.93453	4.61e-07	24Zn/24Fe
chr4	XLOC_051490	Germin-like protein 1a, oxalate oxidase ; enhances tolerance to geminivirus infection in transgenic tobacco. Involved in the defense response to viral pathogens in other plants. GLPs play a role in the reinforcement of plant cell wall, giving plant resistance to biotic and abiotic stresses. GLPs have been classified into subfamilies based on having oxalate oxidase (OXO) or superoxide dismutase (S…		XLOC_051490		-2.52674	7.75e-05	24Zn/24Fe
chr4	XLOC_052011	beta-amylase 1, thioredoxin-regulated beta-amylase; can use p-nitrophenyl maltopentaoside (PNPG5) as substrate only in reduced form. Can play a minor role in the starch degradation and maltose metabolism in chloroplasts during the night. More active on phosphorylated glucan. Interacts directly with starch or other alpha-1,4-glucan. Hydrolysis of (1->4)-alpha-D-glucosidic linkages in polysaccharid…		XLOC_052011		-2.36919	7.82e-05	24Zn/24Fe
chr4	XLOC_052012	beta-amylase 1, thioredoxin-regulated beta-amylase; can use p-nitrophenyl maltopentaoside (PNPG5) as substrate only in reduced form. Can play a minor role in the starch degradation and maltose metabolism in chloroplasts during the night. More active on phosphorylated glucan. Interacts directly with starch or other alpha-1,4-glucan. Hydrolysis of (1->4)-alpha-D-glucosidic linkages in polysaccharid…		XLOC_052012		-3.18903	8.67e-11	24Zn/24Fe
chr4	MLOC_70289	Phosphatidylinositol-glycan biosynthesis class F protein-like isoform X2, PIGF; involved in GPI-anchor biosynthesis through the transfer of ethanolamine phosphate to the third mannose of GPI. Participates in glycolipid biosynthesis; glycosylphosphatidylinositol-anchor biosynthesis. Many eukaryotic cell surface proteins are anchored to the membrane via glycosylphosphatidylinositol (GPI). GPI is sy…	Setaria italica	XLOC_052539		-2.58385	6.95e-08	24Zn/24Fe
chr4	MLOC_10090	Putative disease resistance protein RGA1; a member of disease resistance NB-LRR family, resistance proteins guard the plant against pathogens that contain an appropriate avirulence protein via a direct or indirect interaction with this avirulence protein. That triggers a defense system which restricts the pathogen growth (see Plant J 2003, 36:867-82).	Aegilops tauschii	XLOC_052695		-6.13611	4.41e-12	24Zn/24Fe
chr4	MLOC_53722	G-type lectin S-receptor-like serine/threonine-protein kinase, lectin protein kinase family protein; involved in protein phosphorylation.	Brachypodium distachyon	XLOC_052827		-2.48037	0.000406329	24Zn/24Fe
chr4	MLOC_70290	MLo1 protein; may be involved in modulation of pathogen defense and leaf cell death. Activity seems to be regulated by Ca2+-dependent calmodulin binding and seems not to require heterotrimeric G proteins.	Triticum aestivum	XLOC_053677		-2.18254	1.25e-06	24Zn/24Fe
4HL	MLOC_22126	Uncharacterized		XLOC_058766		-2.56935	0.00930422	24Zn/24Fe
4HL	MLOC_12385	Bidirectional sugar transporter SWEET11; mediates both low-affinity uptake and efflux of sugar across the plasma membrane. Required for pollen viability. Involved in the transport of copper, in cooperation with COPT1 and COPT2. Xa13 (sugar transporter SWEET11) encodes an indispensable plasma membrane protein of the MtN3/saliva family, which is prevalent in eukaryotes with unknown biochemical func…	Triticum urartu	XLOC_059474		-1.97905	0.00652551	24Zn/24Fe
4HL	XLOC_062480	Uncharacterized		XLOC_062480		-1.47168	0.000738018	24Zn/24Fe
4HL	XLOC_063242	Uncharacterized, Mitochondrial		XLOC_063242		-7.09501	1.02e-05	24Zn/24Fe
4HS	MLOC_57116	Putative disease resistance protein RGA1; disease resistance protein. Resistance proteins guard the plant against pathogens that contain an appropriate avirulence protein via a direct or indirect interaction with this avirulence protein. That triggers a defense system which restricts the pathogen growth. Heterotrimeric G-protein complexes (Gα, Gβ and Gγ) operate at the apex of diverse signal tran…	Aegilops tauschii	XLOC_063732		-7.13653	7.31e-06	24Zn/24Fe
4HS	MLOC_19648	3-Ketoacyl-COA synthase 20, KCS20; Encodes KCS20, a member of the 3-ketoacyl-CoA synthase family involved in the biosynthesis of VLCFA (very long chain fatty acids). Involved in cuticle development, fatty acid biosynthetic process, response to cold, response to light stimulus, very long-chain fatty acid metabolic process.	Arabidopsis	XLOC_063979		-2.78881	0.000392248	24Zn/24Fe
4HS	XLOC_064457	Similar to Citrus sinensis miR396c and Arabidopsis lyrata miR159c		XLOC_064457		-1.81932	0.000570325	24Zn/24Fe
4HS	XLOC_065316	Uncharacterized		XLOC_065316		-1.48336	0.000503583	24Zn/24Fe
4HS	XLOC_066871	Uncharacterized		XLOC_066871		-1.43964	0.000795445	24Zn/24Fe
chr5	MLOC_69295	Ferritin 1A	Triticum aestivum	XLOC_067629		-3.47362	0.000669111	24Zn/24Fe
chr5	MLOC_60829	Brassinosteroid insensitive 1-like protein 1, Serine/threonine-protein kinase BRI1-like 1-like; plasma membrane receptor with a serine/threonine-protein kinase activity. Regulates, in response to brassinosteroid binding, a signaling cascade involved in plant development. Binds brassinolide. May be involved in cell growth and vascular differentiation.	Brachypodium distachyon	XLOC_069376		1.56502	0.00576136	24Zn/24Fe
chr5	XLOC_069594	Putitive miRNA; predicted by findMiRNA programm at http://linux1.softberry.com/berry.phtml?topic=findmirna&group=programs&subgroup=rnastruct [ All have similarty to Homo sapiens miR-3666] dir p-mi_b p-mi_e mi_beg mi_end pre-miRNA miRNA + 309 428 334 354 uauuuacacuuggacaucaucuaugugugugagugugccuuugauccuaacuaaauugguggagggucaaaugcauaacccugccaucuagcuagguucaagucuugcacuuggacuuua ugugugagugugccuuugauc + …		XLOC_069594		-3.93453	4.61e-07	24Zn/24Fe
chr5	MLOC_32662	Receptor-like protein kinase FERONIA; a Receptor-like protein kinase that mediates the female control of male gamete delivery during fertilization, including growth cessation of compatible pollen tubes ensuring a reproductive isolation barriers. Required for cell elongation during vegetative growth, mostly in a brassinosteroids- (BR-) independent manner. Induced by brassinosteroids (BR) and invol…	Aegilops tauschii	XLOC_069905		-2.37177	8.66e-05	24Zn/24Fe
chr5	XLOC_070920	Retrotransposon Sukkula_N5D-1		XLOC_070920		-2.9243	5.21e-07	24Zn/24Fe
chr5	XLOC_073651	Uncharacterized		XLOC_073651		2.71024	0.00141209	24Zn/24Fe
chr5	XLOC_075277	Uncharacterized		XLOC_075277		-2.61119	7.31e-06	24Zn/24Fe
5HL	MLOC_10070	Mate transpporter, transparent testa 2, vacoular; involved in flavonols and amino acids	Arabidopsis	XLOC_076270		-3.1139	0.00918652	24Zn/24Fe
chr6	MLOC_41484	Anoxia-induced protein, photosystem I P700 chlorophyll a apoprotein A1-like	Cucumis sativus, Arabidopsis thaliana	XLOC_084412		-1.49491	0.0026528	24Zn/24Fe
chr6	XLOC_084808	Putative non-LTR retroelement reverse transcriptase; RT_nLTR: Non-LTR (long terminal repeat) retrotransposon and non-LTR retrovirus reverse transcriptase (RT). This subfamily contains both non-LTR retrotransposons and non-LTR retrovirus RTs. RTs catalyze the conversion of single-stranded RNA into double-stranded DNA for integration into host chromosomes. RT is a multifunctional enzyme with RNA-di…	Sorghum bicolor	XLOC_084808		-6.24494	2.54e-45	24Zn/24Fe
chr6	MLOC_60633	HvYS15, iron-phytosiderophore (Fe-MA) transporter (OPT SUPERFAMILY); involved in uptake of iron(III)-MA, but not iron-nicotianamine (NA)[see Plant J 2006, 46:563-72; FEBS Lett 2007, 581:4298-302). For HvYS2 see Plant Cell Physiol 2011, 52:1931-40. HvYS1 expression was not induced by any other metal deficiency and showed a distinct diurnal rhythm, reaching a maximum before the onset of phytosidero…		XLOC_084948		-5.03892	7.39e-06	24Zn/24Fe
chr6	MLOC_10793	Putative LRR receptor-like serine/threonine-protein kinase, Similar to putative protein kinase OsXa21; Xb3 is necessary for full accumulation of the XA21 protein and for Xa21-mediated resistance to to specific races of the causal agent of bacterial blight disease, Xanthomonas oryzae pv oryzae (see The Plant Cell 2006, 18:3635-3646). XB3 contains an ankyrin repeat domain and a RING finger motif th…	Aegilops tauschii	XLOC_085372		-2.18161	0.00894925	24Zn/24Fe
chr6	MLOC_11835	Catalase 2, partial; occurs in almost all aerobically respiring organisms and serves to protect cells from the toxic effects of hydrogen peroxide. Needs heme and catalyzes 2 H2O2 = O2 + 2 H2O.		XLOC_085584		-1.70709	0.00352228	24Zn/24Fe
6HL	MLOC_58163	Bidirectional sugar transporter SWEET13; Mediates both low-affinity uptake and efflux of sugar across the plasma membrane (Nature 2010, 468:527-32). Plants transport fixed carbon predominantly as sucrose, which is produced in mesophyll cells and imported into phloem cells for translocation throughout the plant. It is not known how sucrose migrates from sites of synthesis in the mesophyll to the p…	Triticum urartu	XLOC_091568		-5.82741	4.68e-10	24Zn/24Fe
6HL	XLOC_092302	AP-1 complex subunit gamma-2-like; subunit of clathrin-associated adaptor protein complex 1 that plays a role in protein sorting in the late-Golgi/trans-Golgi network (TGN) and/or endosomes. The AP complexes mediate both the recruitment of clathrin to membranes and the recognition of sorting signals within the cytosolic tails of transmembrane cargo molecules.	Brachypodium distachyon	XLOC_092302		-4.14041	7.98e-22	24Zn/24Fe
6HL	XLOC_094648	Uncharacterized		XLOC_094648		-2.36919	4.53e-05	24Zn/24Fe
6HL	XLOC_094817	Photosystem II protein D2	Gnetum parvifolium	XLOC_094817		-1.68083	0.00494179	24Zn/24Fe
chr7	MLOC_13047	Putative LRR receptor-like serine/threonine-protein kinase; see BMC Genomics 2010, 11:19.	Aegilops tauschii	XLOC_099100		-4.85251	3.34e-05	24Zn/24Fe
chr7	MLOC_57679	GDSL esterase/lipase At5g45910-like isoform 1; involved in lipid degradation.	Brachypodium distachyon	XLOC_100853		1.87751	0.000773315	24Zn/24Fe
chr7	XLOC_100917	Retrotransposon:RLG_Sukkula-1		XLOC_100917		-2.17999	0.000543288	24Zn/24Fe
chr7	MLOC_16705	Lysine histidine transporter 1 (LHT1)-like isoform X2; amino acid-proton symporter. Transporter with a broad specificity for histidine, lysine, glutamic acid, alanine, serine, proline and glycine. Involved in both apoplastic transport of amino acids in leaves and their uptake by roots.	Setaria italica	XLOC_101222		-2.66742	0.00185963	24Zn/24Fe
chr7	MLOC_22651	Myo-inositol oxygenase, involved in defence mechanisms (New Phytol. 2013 Oct 1. doi: 10.1111/nph.12535).	Arabidopsis	XLOC_101693		-1.97983	0.00933093	24Zn/24Fe
chr7	MLOC_57343	G-type lectin S-receptor-like serine/threonine-protein kinase At2g19130; induced by ABA, salt, and drought stresses in Glycine soja. Its overexpression in Arabidopsis, enhances salt tolerance and higher yields under salt stress, with higher chlorophyll content, lower ion leakage, higher plant height, and more siliques at the adult developmental stage (J Plant Physiol 2013, 170:505-15).	Brachypodium distachyon	XLOC_101826		-2.20694	0.000690056	24Zn/24Fe
chr7	XLOC_102179	Thaumatin-like protein PWIR2, Pathogenesis-related protein 1; probably involved in the defense reaction of plants against pathogens.		XLOC_102179		-5.28522	3.49e-14	24Zn/24Fe
7HL	MLOC_57785	Beta-glucosidase 34 (BGLU34); apoplastic and chloroplastic hydrolysis of terminal, non-reducing beta-D-glucosyl residues with release of beta-D-glucose.	Triticum urartu	XLOC_108664		-1.531	0.00290648	24Zn/24Fe
7HL	MLOC_57139	AAO3, Abscisic aldehyde oxidase 3; involved in chlorophyl degradation. Plant Cell. 2014 Dec;26(12):4862-74. A NAP-AAO3 regulatory module promotes chlorophyll degradation via ABA biosynthesis in Arabidopsis leaves.Yang J, Worley E, Udvardi M.	Brachypodium distachyon	XLOC_108860		-3.2595	0.00486811	24Zn/24Fe
7HL	MLOC_14874	Bifunctional monodehydroascorbate reductase and carbonic anhydrase nectarin-3, Alpha carbonic anhydrase 7; NADH + 2 monodehydroascorbate = NAD+ + 2 ascorbate and H2CO3 = CO2 + H2O. May be involved in regulation of nectar pH. May also regulate nectar ascorbate concentration (Plant Mol Biol. 2004 Feb;54(3):415-25).	Aegilops tauschii	XLOC_108878		-2.69978	0.00933093	24Zn/24Fe
7HL	XLOC_109071	Putitive miRNA, Similar to Hordeum vulgare miR5049f; Putative miRNAs are predicted by findMiRNA programm at http://linux1.softberry.com/berry.phtml?topic=findmirna&group=programs&subgroup=rnastruct dir p-mi_b p-mi_e mi_beg mi_end pre-miRNA miRNA + 49 168 113 133 ugaggcaaaggugguguccgaugagggugaggguggcgugauggcuuugccuagguuuaucaagccuccggauaguuaaaaagccuacauccugcuuacaguguauauugaucaauggga ccuccggauaguuaa…		XLOC_109071		-1.73195	0.00555667	24Zn/24Fe
7HS	XLOC_114107	Uncharacterized		XLOC_114107		-1.47334	0.000571872	24Zn/24Fe
morex_contig_110255	XLOC_117092	Uncharacterized		XLOC_117092		-2.37462	9.42e-05	24Zn/24Fe
morex_contig_11938	XLOC_117444	Similar to Solanum tuberosum miR8005a/c; Putitive miRNA predicted by findMiRNA programm at http://linux1.softberry.com/berry.phtml?topic=findmirna&group=programs&subgroup=rnastruct dir p-mi_b p-mi_e mi_beg mi_end pre-miRNA miRNA + 428 547 522 542 uauuuaucucauguacgcagcggcagggcagguuucucggugauuaacuuguugaaacaccggacccuuaauuaugaugacuauugcucuauuaguggggccuacugcacauaagguagu guggggccuacugcacauaag + 921 104…		XLOC_117444		-8.44404	3.63e-13	24Zn/24Fe
morex_contig_1508383	MLOC_9279	Photosystem II D1 protein, Chloroplast genome product; the D1/D2 heterodimer core is the heart of the photosystem II reaction center. A characteristic feature of this heterodimer is the differentially rapid, light-dependent degradation of the D1 protein. The photosystem II (PSII) reaction center in oxygenic phototrophs is dominated by the D1/D2 heterodimer core. A characteristic feature of this h…	Raphanus raphanistrum	XLOC_118629		-1.57027	0.00127454	24Zn/24Fe
morex_contig_173323	XLOC_121438	Retrotransposon protein, putative	Oryza sativa	XLOC_121438		-2.51462	7.02e-05	24Zn/24Fe
morex_contig_2430881	MLOC_34266	Photosystem II D2 protein, chloroplastic; D2 is needed for assembly of a stable PSII complex.	Leymus chinensis	XLOC_124655		-1.65607	0.000110378	24Zn/24Fe
morex_contig_2566919	XLOC_125552	Disease resistance protein RPM1, RPS3, Resistance to Pseudomonas syringae protein 3; Disease resistance (R) protein that specifically recognizes the AvrRpm1 type III effector avirulence protein from Pseudomonas syringae. Resistance proteins guard the plant against pathogens that contain an appropriate avirulence protein via an indirect interaction with this avirulence protein. That triggers a def…	Aegilops tauschii	XLOC_125552		-3.43801	0.000137762	24Zn/24Fe
morex_contig_256787	XLOC_125566	Uncharacterized		XLOC_125566		-1.53717	0.00109419	24Zn/24Fe
chr1	XLOC_000024	B hordein		XLOC_000024	TCONS_00000077	7.33714	0.00977071	24Zn/UT
chr1	MLOC_14903	Putative F-box/LRR-repeat protein 23-like; essential protein for male fertility. Component of the SCF(ASK-cullin-F-box) E3 ubiquitin ligase complex SCF(FBL17), which mediates the ubiquitination and subsequent proteasomal degradation of target proteins. Enables the switch in cell cycle control leading to male germ cell lineage formation from microspores after meiosis. Targets CDKA-1 inhibitors the…	Brachypodium distachyon	XLOC_000094	TCONS_00000311	7.81523	0.00417663	24Zn/UT
chr1	MLOC_60926	Mitogen-activated protein kinase 2;likely involved in defense signaling (see Plant J 2003, 34:149-60). MAP kinases function downstream of HSP90 and upstream of mitochondria in TMV resistance (see Plant Cell Physiol 2007, 48:498-510).	Triticum aestivum	XLOC_000260	TCONS_00000869	8.57813	0.00123639	24Zn/UT
chr1	MLOC_17372	CTLH domain-containing protein, Uncharacterized; could be considered as a scaffolding protein and centrosome associated protein (BMC Plant Biology 2012, 12:83)		XLOC_000368	TCONS_00001248	-8.19762	0.00230061	24Zn/UT
chr1	MLOC_44501	VIP2 protein (putative transcription factor); interacts with VIVIPAROUS 1 and ABSCISIC ACID INSENSITIVE 3 (ABI3) and involved in seed dormancy with highest expression during dormancy in Avena fatua (see Plant J 2000, 21:133-42). AIP2 and VIP2 are both RING ubiquitin ligases interacting with the homolog proteins ABI3/VP1, suggests that VIP2 could represent the monocot AIP2. Indeed, it has been dem…	Avena fatua, Oryza sativa	XLOC_000404	TCONS_00001381	-9.75795	0.000135601	24Zn/UT
chr1	MLOC_70229	GPI-anchored protein At1g61900-like isoform X3; Glycosylphosphatidylinositol (GPI)-anchored protein are involved in endocytosis (see Cell Mol Life Sci 2001, 58:1969-87; J Biomed Sci 2009, 16:93).	Setaria italica	XLOC_000556	TCONS_00001945	-7.86632	0.00417663	24Zn/UT
chr1	MLOC_11603	Xanthine dehydrogenase; a key enzyme in purine degradation. Catalyzes the oxidation of hypoxanthine to xanthine. Catalyzes the oxidation of xanthine to uric acid. This isoform does not have the N-terminal 2Fe-2S binding site.	Aegilops tauschii	XLOC_000594	TCONS_00002112	8.0571	0.00314995	24Zn/UT
chr1	MLOC_57578	Ras-like protein, Ras-related protein ARA-3; involved in membrane trafficking from the Golgi to the plasma membrane (J Cell Sci 2009, 122:4383-4392)	Aegilops tauschii, Medicago truncatula	XLOC_000647	TCONS_00002321	7.60977	0.00667837	24Zn/UT
chr1	MLOC_10280	MCB1 protein; HvMCB1 and HvMCB2, that bind specifically to defined regions of CAB promoters derived from wheat and barley and is essential for high level expression (see Plant Mol Biol 2003, 52:447-62). CAB proteins are chrolophyll a/b binding proteins of photosystem II.		XLOC_000683	TCONS_00002466	-8.53539	0.0012749	24Zn/UT
chr1	MLOC_1154	Uncharacterized		XLOC_000725	TCONS_00002628	-8.04146	0.00314995	24Zn/UT
chr1	MLOC_14312	Putative DNA2-NAM7 helicase family protein, tRNA-splicing endonuclease positive effector-related protein	Oryza sativa	XLOC_000737	TCONS_00002690	-8.0177	0.00314995	24Zn/UT
chr1	MLOC_56196	DnaJ homolog subfamily C member 7; acts as co-chaperone regulating the molecular chaperones HSP70 and HSP90, act as a recycling chaperone by facilitating the return of chaperone substrates to early stages of chaperoning if further folding is required. Predicted as chlorplast localized protein by PlantLocserver.	Aegilops tauschii	XLOC_000743	TCONS_00002710	-8.61671	0.00109272	24Zn/UT
chr1	MLOC_56196	DnaJ homolog subfamily C member 7; acts as co-chaperone regulating the molecular chaperones HSP70 and HSP90, act as a recycling chaperone by facilitating the return of chaperone substrates to early stages of chaperoning if further folding is required. Predicted as chlorplast localized protein by PlantLoc server. This isoform has no DnaJ and the second Tetratricopeptide repeat domain (TPR) domains…	Aegilops tauschii	XLOC_000743	TCONS_00002713	6.52054	0.00179953	24Zn/UT
chr1	XLOC_000746	AMP deaminase, EMBRYONIC FACTOR 1, AMPD, FAC1; AMP deaminase plays a critical role in energy metabolism. Essential for the transition from zygote to embryo (J Biol Chem 2006, 281:14939-47). Adenosine deaminases acting on RNA (ADAR1 and ADAR2) are human RNA-editing adenosine deaminases responsible for the conversion of adenosine to inosine at specific locations in cellular RNAs (Nucleic Acids Res …	Brachypodium distachyon	XLOC_000746	TCONS_00002720	10.3209	6.32e-05	24Zn/UT
chr1	MLOC_11260	Probable NOT transcription complex subunit VIP2-like; NOT5 family ; NOT1, NOT2, NOT3, NOT4 and NOT5 form a nuclear complex that negatively regulates the basal and activated transcription of many genes	Brachypodium distachyon	XLOC_000932	TCONS_00003331	-7.94399	0.0037735	24Zn/UT
chr1	MLOC_37136	Putative Mic1 homolog, Colon cancer-associated protein Mic1-like; this isoform does not have the last 357 amino acids. MIC-1 as a member of transforming growth factor (TGF)- superfamily is a newly defined central regulator of appetite and a potential target for the treatment of both cancer anorexia and weight loss, as well as of obesity.	Oryza sativa	XLOC_001046	TCONS_00003686	5.11815	0.00967407	24Zn/UT
chr1	MLOC_69619	Dynamin-related protein 5A-like; Microtubule-associated force-producing protein (see Biochem Soc Trans 2010, 38:797-806).	Brachypodium distachyon	XLOC_001249	TCONS_00004347	9.28794	0.000313405	24Zn/UT
chr1	MLOC_53410	Putative ubiquitin-conjugating enzyme E2 24 (UBC24), PHO2; up-regulated in senescing leaves and maturating seeds, down-regulated by phosphate deprivation, and regulated by microRNA399 (miR399).	Triticum urartu	XLOC_001282	TCONS_00004460	5.56704	0.00929072	24Zn/UT
chr1	MLOC_10939	Uncharacterized		XLOC_001342	TCONS_00004625	9.52593	0.00019742	24Zn/UT
chr1	MLOC_54939	SMC3 protein (structural maintenance of chromosomes protein 3);	Oryza sativa	XLOC_001388	TCONS_00004805	7.55348	0.00736121	24Zn/UT
chr1	MLOC_68591	Nuclear receptor coactivator 3-like (NCOA3); nuclear receptor coactivator that directly binds nuclear receptors and stimulates the transcriptional activities in a hormone-dependent fashion. Present in a complex containing NCOA2, IKKA, IKKB, IKBKG and the histone acetyltransferase protein CREBBP. For plants see Nucleic Acids Research 2002, 30:5036-5055. NCOA3 is frequently amplified or overexpress…	Setaria italica	XLOC_001469	TCONS_00005037	8.29883	0.00201835	24Zn/UT
chr1	MLOC_68591	Nuclear receptor coactivator 3-like (NCOA3); nuclear receptor coactivator that directly binds nuclear receptors and stimulates the transcriptional activities in a hormone-dependent fashion. Present in a complex containing NCOA2, IKKA, IKKB, IKBKG and the histone acetyltransferase protein CREBBP. For plants see Nucleic Acids Research 2002, 30:5036-5055. NCOA3 is frequently amplified or overexpress…	Setaria italica	XLOC_001469	TCONS_00005044	-7.81211	0.00454319	24Zn/UT
chr1	MLOC_10620	Transcriptional regulator ATRX-like protein; involved in chromatin remodelling and DNA methylation (see Nature Genetics 2000, 24:368-371.	Brachypodium distachyon	XLOC_001602	TCONS_00005487	8.33267	0.00186322	24Zn/UT
chr1	MLOC_30568	N-acetylglucosaminyltransferase VII, LEC14; it introduces β1,2-linked N-acetylglucosamine residue to the central mannose moiety of the core-fucosylated oligosaccharide (N-glycan). N-Glycosylation is the most frequent and structurally most variegated form of post-translational modification. N-glycan structure in glycoproteins is relevant for quality control, underscoring the notion that the glycan…	Brachypodium distachyon	XLOC_001664	TCONS_00005689	7.40233	0.00929072	24Zn/UT
chr1	MLOC_64212	Putative phosphoglycerate mutase DET1; metal-independent, broad-range acid phosphatase. Involved, either directly or indirectly, in the bidirectional transport of sterols between the endoplasmic reticulum and the plasma membrane.	Aegilops tauschii	XLOC_001668	TCONS_00005696	7.40233	0.00929072	24Zn/UT
chr1	MLOC_56428	Ankyrin-2; attaches integral membrane proteins to cytoskeletal elements.	Aegilops tauschii	XLOC_001678	TCONS_00005743	-7.66694	0.0059726	24Zn/UT
chr1	MLOC_58884	Pleckstriny domain-containing protein, similar to EDR2; likely involved in lipid trafficking between intracellular compartments, lipid metabolism, and cell wall biogenesis based on the START domain. Involved in plant defence mechanisms. ENHANCED DISEASE RESISTANCE 2 (EDR2) encodes a novel protein with a pleckstrin homology and a StAR transfer (START) domain as well as a plant-specific domain of u…	Oryza sativa	XLOC_001870	TCONS_00006506	7.79109	0.00454319	24Zn/UT
chr1	MLOC_55523	GTPase-activating protein GYP7; small GTPases of the Ypt/Rab family are regulators of vesicular protein trafficking in exo-and endocytosis. GTPase-activating proteins (GAP) play an important role as down regulators of GTPases. In yeast, effectively accelerate the intrinsic GTPase activity of Ypt7p (Eur J Biochem 1999, 260:284-90)	Triticum urartu	XLOC_001886	TCONS_00006562	7.79109	0.00475111	24Zn/UT
chr1	MLOC_50473	SKIP interacting protein 13, Centromere-associated protein E, kinesin-like protein; rice SKIPa positively regulates cell viability and stress tolerance as in human (PNAS 2009, 106:6410-6415).	Oryza sativa, Triticum urartu	XLOC_001944	TCONS_00006737	-7.63607	0.0063519	24Zn/UT
chr1	MLOC_11806	Major facilitator superfamily domain-containing protein 5-like, MFSD5; responsible for molybdate uptake (PNAS 2011, 108:6420-6425; PNAS 2007, 104:18807-18812; PLoS Genetics 2008, 4:e1000004; PLoS One 2013, 8:e58175). This isoform does not have the first N-terminal 211 amino acids including the "secretory pathway" signal peptide found in the isoform TCONS_00006759 with full length.	Brachypodium distachyon	XLOC_001950	TCONS_00006760	9.14288	0.000394025	24Zn/UT
chr1	MLOC_43476	Early-responsive to dehydration stress protein isoform 2; early responsive to dehydration (ERD) genes are rapidly induced in response to dehydration stress in a variety of plant species. The Brassica juncea ERD4 protein of unknown function possesses ubiquitous DUF221 domain (residues 312–634) and is conserved in all plant species. It is suggested that the protein is localized in chloroplast membr…	Theobroma cacao	XLOC_001955	TCONS_00006774	-7.69716	0.00573677	24Zn/UT
chr1	MLOC_10361	Putative ADP-ribosylation factor GTPase-activating protein AGD8; Small GTPases of the ADP-ribosylation factor (ARF) family, except for ARF6, mainly localize to the Golgi apparatus, where they trigger formation of coated carrier vesicles. Class I ARFs (ARF1 and ARF3) localize to recycling endosomes, as well as to the Golgi, and are redundantly required for recycling of endocytosed transferrin. Sim…	Triticum urartu	XLOC_001985	TCONS_00006871	-7.53928	0.00736121	24Zn/UT
chr1	MLOC_56050	Zinc finger CCCH domain-containing protein 8; CCCH domain-containing proteinS could have an effective role in stress tolerance (see BMC Genomics 2008, 27;9:44).	Aegilops tauschii	XLOC_001995	TCONS_00006914	5.41939	0.00363494	24Zn/UT
chr1	XLOC_002008	Xanthine dehydrogenase; a key enzyme in purine degradation. Catalyzes the oxidation of hypoxanthine to xanthine. Catalyzes the oxidation of xanthine to uric acid. Catalyzes Xanthine + NAD+ + H2O = urate + NADH and Hypoxanthine + NAD+ + H2O = xanthine + NADH. Needs two 2 2Fe-2S clusters. Xanthine dehydrogenase (XDH; EC 1.1.1.204) is a complex molybdo/iron-sulfur flavoprotein that catalyzes the oxi…	Triticum urartu	XLOC_002008	TCONS_00006976	7.5819	0.00707376	24Zn/UT
chr1	MLOC_57759	Peptide methionine sulfoxide reductase; reactive oxygen and nitrogen intermediates can cause damage to many cellular components and have been implicated in a number of diseases. Cells have developed a variety of mechanisms to destroy these reactive molecules or repair the damage once it occurs. In proteins one of the amino acids most easily oxidized is methionine, which is converted to methionine…	Zea mays	XLOC_002062	TCONS_00007178	7.60977	0.00667837	24Zn/UT
chr1	MLOC_5093	ARABIDILLO 1-like ; promotes lateral root initiation and development, independently of auxin (IAA) and abscisis acid (ABA) [Proc Natl Acad Sci U S A 2006, 103:1621-6]. It promotes Arabidopsis early embryo and endosperm development(Plant Cell 2012, 24:4026-43).	Brachypodium distachyon	XLOC_002068	TCONS_00007195	-7.94399	0.0037735	24Zn/UT
chr1	MLOC_61466	MLO-like protein 1; may be involved in modulation of pathogen defense and leaf cell death. Activity seems to be regulated by Ca2+-dependent calmodulin binding and seems not to require heterotrimeric G proteins	Aegilops tauschii	XLOC_002231	TCONS_00007855	-7.53928	0.00736121	24Zn/UT
chr1	MLOC_4839	Acylamino-acid-releasing enzyme, Acylaminoacyl-peptidase; this enzyme catalyzes the hydrolysis of the N-terminal peptide bond of an N-acetylated peptide to generate an N-acetylated amino acid and a peptide with a free N-terminus (J Biol Chem 1987, 262:11435-11445). It preferentially cleaves off Ac-Ala, Ac-Met and Ac-Ser. It can be defined as stress-regulated proteins (see PLoS One 2012, 7:e37921).	Triticum urartu	XLOC_002247	TCONS_00007911	8.19227	0.00230061	24Zn/UT
chr1	XLOC_002298	Uncharacterized		XLOC_002298	TCONS_00008104	-9.95843	0.000106739	24Zn/UT
chr1	XLOC_002298	Uncharacterized		XLOC_002298	TCONS_00008105	-10.9069	1.75e-05	24Zn/UT
chr1	ARF1	GTP-binding, small GTPase mediated signal transduction, positive regulation of floral organ abscission by small GTPase mediated signal transduction		XLOC_002308	TCONS_00008170	10.9306	1.75e-05	24Zn/UT
chr1	MLOC_5591	Arginyl-tRNA synthetase, cytoplasmic-like	Brachypodium distachyon	XLOC_002312	TCONS_00008189	-8.31921	0.00190788	24Zn/UT
chr1	MLOC_5591	Arginyl-tRNA synthetase, cytoplasmic-like	Brachypodium distachyon	XLOC_002312	TCONS_00008191	8.29883	0.00197653	24Zn/UT
chr1	MLOC_62418	Very-long-chain (3R)-3-hydroxyacyl-[acyl-carrier protein] dehydratase 2-like isoform X1; responsible for the dehydration step in very long-chain fatty acid (VLCFA) synthesis.	Setaria italica	XLOC_002384	TCONS_00008473	-8.19762	0.00230061	24Zn/UT
chr1	MLOC_14736	Bifunctional aspartate aminotransferase and glutamate/aspartate-prephenate aminotransferase-like; prokaryotic-type aspartate aminotransferase. Has also a prenate transaminase activity. Involved in the aromatic amino acids biosynthesis pathway via the arogenate route. Required for the transamination of prephenate into arogenate. Required for early development of the plant embryo. Catalyzes L-aspar…	Setaria italica	XLOC_002421	TCONS_00008579	-6.77091	0.00147837	24Zn/UT
chr1	MLOC_14736	Bifunctional aspartate aminotransferase and glutamate/aspartate-prephenate aminotransferase-like; prokaryotic-type aspartate aminotransferase. Has also a prenate transaminase activity. Involved in the aromatic amino acids biosynthesis pathway via the arogenate route. Required for the transamination of prephenate into arogenate. Required for early development of the plant embryo. Catalyzes L-aspar…	Setaria italica	XLOC_002421	TCONS_00008580	9.43539	0.000239295	24Zn/UT
chr1	MLOC_36390	ABC transporter B family member 11, ABCB11, MDR8, MULTI-DRUG RESISTANCE 8, P-GLYCOPROTEIN 11, PGP11; coupled to transmembrane movement of substances. This isoform codes for a very short peptide of the protein.	Aegilops tauschii	XLOC_002490	TCONS_00008822	-8.04146	0.00314995	24Zn/UT
chr1	MLOC_68728	Putative glycosyltransferase AGO61 (GTDC2); secreted. Glycosyltransferases (abbre. GTFs, Gtfs) are enzymes (EC 2.4) that are responsible for the biosynthesis of disaccharides, oligosaccharides and polysaccharides. They catalyse the transfer of monosaccharide moieties from activated nucleotide sugar (also known as the "glycosyl donor") to a glycosyl acceptor molecule, usually an alcohol.	Triticum urartu	XLOC_002539	TCONS_00009007	10.4068	4.77e-05	24Zn/UT
chr1	MLOC_48709	Periodic tryptophan protein 2 (PWP2) homolog; WD40 domain, found in a number of eukaryotic proteins that cover a wide variety of functions including adaptor/regulatory modules in signal transduction, pre-mRNA processing and cytoskeleton assembly.	Setaria italica	XLOC_002627	TCONS_00009270	-8.31921	0.00190788	24Zn/UT
chr1	MLOC_56286	ZIP7, At Zinc transporter protein ZIP4; ZIP transporters mediate zinc uptake. May also transport copper and cadmium ions (see J Biol Chem 2003, 278:47644-53; Proc Natl Acad Sci U S A 1998, 95:7220-4). For more details in ZIP in plants look at Plant Biotechnology Reports 2013, 7:309-319; Plant Physiology 2003, 133:126-134; Mol Biol Rep 2009, 36:281-7). This isoform codes for 148 amino acids.		XLOC_002640	TCONS_00009313	7.69028	0.00527138	24Zn/UT
1H	XLOC_007299	Putitive linker histone 1 and histone 5 domains protein; involved in chromatin structure.		XLOC_007299	TCONS_00014924	7.4647	0.00825608	24Zn/UT
1H	XLOC_007528	NEP1-interacting protein 1; intrinsic thylakoid membrane protein that fixes RPOT2 on the stromal side of the thylakoid membrane. RPOTp and RPOTmp. RPOTp plays an important role in chloroplast transcription, biogenesis, and mesophyll cell proliferation. RPOTmp fulfills a specific function in the transcription of the rrn operon in proplasts/amyloplasts during seed imbibition/germination and a more …	Brachypodium distachyon	XLOC_007528	TCONS_00015559	7.33714	0.00981553	24Zn/UT
1H	XLOC_007904	Malate dehydrogenase, cytosolic; malate dehydrogenase is an enzyme that reversibly catalyzes the oxidation of malate to oxaloacetate using the reduction of NAD+ to NADH. This reaction is part of many metabolic pathways, including the citric acid cycle. Other malate dehydrogenases, which have other EC numbers and catalyze other reactions oxidizing malate, have qualified names like malate dehydroge…	Triticum aestivum	XLOC_007904	TCONS_00016228	-8.46687	0.0014152	24Zn/UT
1H	MLOC_69406	ATP-dependent RNA helicase DHX36-like isoform X1; plays a role in degradation and deadenylation of mRNAs containing in their 3'-UTR the consensus ARE sequence element.	Setaria italica	XLOC_008171	TCONS_00016592	-7.39921	0.00929072	24Zn/UT
1H	MLOC_71257	RING finger protein 44 (rnf44); rnf44 is one of the miR-296 targets. miR-296 is a global repressor of tumorigenicity (PloSONE 2008, 3:e2436; Oncogene 2012, 31:27-38).	Aegilops tauschii	XLOC_008227	TCONS_00016786	9.67188	0.000154574	24Zn/UT
1H	MLOC_71257	RING finger protein 44 (rnf44); rnf44 is one of the miR-296 targets. miR-296 is a global repressor of tumorigenicity (PloSONE 2008, 3:e2436; Oncogene 2012, 31:27-38). This isoform does not have the RING domain at the C-terminal region which could be found at isoform TCONS_00016786 (length 1724 bases).	Aegilops tauschii	XLOC_008227	TCONS_00016787	-8.61671	0.00109272	24Zn/UT
1H	MLOC_65843	MIKC-type MADS-box transcription factor WM27B, AGAMOUS-like MADS-box protein AGL11; encodes a MADS box transcription factor expressed in the carpel and ovules. Plays a maternal role in fertilization and seed development.	Arabidopsis thaliana	XLOC_008231	TCONS_00016802	-7.66694	0.0059726	24Zn/UT
1H	MLOC_14781	Uncharacterized		XLOC_008308	TCONS_00017124	-9.88155	0.000109441	24Zn/UT
1H	MLOC_14781	Uncharacterized		XLOC_008308	TCONS_00017126	9.76777	0.000135601	24Zn/UT
1H	MLOC_14781	Uncharacterized		XLOC_008308	TCONS_00017130	7.90794	0.0037735	24Zn/UT
1H	MLOC_26505	Heat shock 70 kDa protein 4L; possesses chaperone (PROTEIN FOLDING) activity in vitro where it inhibits aggregation of citrate synthase.	Triticum urartu	XLOC_008309	TCONS_00017137	8.29883	0.00197653	24Zn/UT
1H	XLOC_008348	Ubiquitin carboxyl-terminal hydrolase 10, UBP10, Deubiquitinating enzyme 10; recognizes and hydrolyzes the peptide bond at the C-terminal Gly of ubiquitin. Involved in the processing of poly-ubiquitin precursors as well as that of ubiquitinated proteins	Aegilops tauschii	XLOC_008348	TCONS_00017242	-8.60081	0.00109272	24Zn/UT
1H	MLOC_1587	Alpha-galactosidase-like; carbohydrate metabolic process, hydrolases which attack glycosidic bonds in carbohydrates, glycoproteins and glycolipids. The glycosidases are not highly specific. Usually they distinguish only the type of bond, e.g. O- or N-glycosidic, and its configuration (alpha or beta).	Brachypodium distachyon	XLOC_008356	TCONS_00017264	-8.17632	0.00247778	24Zn/UT
1H	MLOC_14529	Initiation factor eIF-2B subunit beta	Brachypodium distachyon	XLOC_008458	TCONS_00017547	-7.39921	0.00929072	24Zn/UT
1H	MLOC_37688	LRR receptor-like serine/threonine-protein kinase GSO1, Protein GASSHO 1; together with GSO2, receptor-like serine/threonine-kinase required during the development of the epidermal surface in embryos and cotyledons (Plant J 2008, 54:30-42).	Aegilops tauschii	XLOC_008561	TCONS_00017805	8.53517	0.0012749	24Zn/UT
1H	MLOC_14978	LEC14B homolog; involved in glycosylation. Likely, hasN-Acetylglucosaminyltransferase activity (J Biol Chem 1998, 273:14090-14098).	Brachypodium distachyon	XLOC_008584	TCONS_00017873	9.1898	0.000368028	24Zn/UT
1H	XLOC_008969	Uncharacterized	Triticum aestivum	XLOC_008969	TCONS_00018545	-11.2196	1.13e-05	24Zn/UT
1H	XLOC_008969	Uncharacterized	Triticum aestivum	XLOC_008969	TCONS_00018546	10.525	4.06e-05	24Zn/UT
1H	XLOC_008969	Uncharacterized	Triticum aestivum	XLOC_008969	TCONS_00018547	10.2069	7.42e-05	24Zn/UT
chr2	MLOC_44719	Glutamyl-tRNA(Gln) amidotransferase subunit A; allows the formation of correctly charged Gln-tRNA(Gln) through the transamidation of misacylated Glu-tRNA(Gln) in organisms which lack glutaminyl-tRNA synthetase. The reaction takes place in the presence of glutamine and ATP through an activated gamma-phospho-Glu-tRNA(Gln)	Aegilops tauschii	XLOC_016198	TCONS_00026040	-7.91856	0.00393819	24Zn/UT
chr2	MLOC_44719	Glutamyl-tRNA(Gln) amidotransferase subunit A; allows the formation of correctly charged Gln-tRNA(Gln) through the transamidation of misacylated Glu-tRNA(Gln) in organisms which lack glutaminyl-tRNA synthetase. The reaction takes place in the presence of glutamine and ATP through an activated gamma-phospho-Glu-tRNA(Gln)	Aegilops tauschii	XLOC_016198	TCONS_00026041	7.63711	0.0059726	24Zn/UT
chr2	MLOC_9931	E3 ubiquitin-protein ligase UPL3, HECT ubiquitin-protein ligase 3, Protein KAKTUS; probable E3 ubiquitin-protein ligase which mediates ubiquitination and subsequent proteasomal degradation of target proteins. Involved in the repression of endoreduplication process and the cell morphogenesis in the trichomes (see Mol Genet Genomics 2003, 270:403-14; Genetics 1999, 152:461-76).	Aegilops tauschii	XLOC_016253	TCONS_00026207	4.37251	0.00739806	24Zn/UT
chr2	MLOC_44311	Transcription factor RF2a/b; probably involved in vascular development and shoot tissue organization. Binds to the DNA sequence 5'-CCGAGTGTGCCCCTGG-3' present in the promoter region Box II of the phloem-specific rice tungro bacilliform virus (RTBV) promoter. May regulate tissue-specific expression of the RTBV promoter and virus replication. Binds DNA as a homodimer or as a heterodimer with each o…	Aegilops tauschii	XLOC_016384	TCONS_00026577	-7.39921	0.00993539	24Zn/UT
chr2	MLOC_44311	Transcription factor RF2a/b; probably involved in vascular development and shoot tissue organization. Binds to the DNA sequence 5'-CCGAGTGTGCCCCTGG-3' present in the promoter region Box II of the phloem-specific rice tungro bacilliform virus (RTBV) promoter. May regulate tissue-specific expression of the RTBV promoter and virus replication. Binds DNA as a homodimer or as a heterodimer with each o…	Aegilops tauschii	XLOC_016384	TCONS_00026578	7.86233	0.00417663	24Zn/UT
chr2	MLOC_67498	Myb family transcription factor APL; required for phloem identity. Has a dual role both in promoting phloem differentiation and in repressing xylem differentiation during vascular development (Nature 2003, 426:181-186; Plant Cell 2008, 20:1494-1503).	Aegilops tauschii	XLOC_016402	TCONS_00026667	-6.0358	0.00570284	24Zn/UT
chr2	MLOC_38578	RNA ligase isoform 2; A possible role in RNA metabolism, RNA silencing in particular is discussed (Biochem Biophys Res Commun 2006, 347:1080-7). This isoform is the first half of the isoform TCONS_00026900 which shows the opposite trend.	Triticum aestivum	XLOC_016466	TCONS_00026899	-7.94399	0.0037735	24Zn/UT
chr2	MLOC_17364	Phospho-2-dehydro-3-deoxyheptonate aldolase 2 (chloroplastic-like); a stress protein with function of stereospecific condensation of phosphoenolpyruvate (PEP) and D-erythrose-4-phosphate (E4P) giving rise to 3-deoxy-D-arabino-heptulosonate-7-phosphate (DAHP). Induced by pathogen infection and wounding. Involved in Aromatic amino acid biosynthesis by chorismate biosynthesis.	Brachypodium distachyon	XLOC_016527	TCONS_00027100	9.1898	0.000368028	24Zn/UT
chr2	XLOC_016530	Partially similar to microRNA1126; similarity is from nucleotide 1 to 633 of the barley miRNA1126. SEE BMC Genomics 2013, 14:34		XLOC_016530	TCONS_00027124	10.0732	9.08e-05	24Zn/UT
chr2	MLOC_67100	Uncharacterized WD repeat-containing protein C2A9.03-like	Brachypodium distachyon	XLOC_016535	TCONS_00027159	7.71616	0.00500819	24Zn/UT
chr2	MLOC_50178	Transmembrane E3 ubiquitin-protein ligase 1-like; E3 ubiquitin ligase protein that mediates ubiquitination of yeast vacuolar proteins such as CPS1, PPN1, PEP12 and other proteins containing exposed hydrophilic residues within their transmembrane domains (TMDs). Ubiquitination of such proteins mediates their sorting into internal vesicles in late endosomes.	Brachypodium distachyon	XLOC_016614	TCONS_00027511	-8.55203	0.00123639	24Zn/UT
chr2	MLOC_43627	RNA-binding protein Musashi-like protein 1 (MSI1); RNA binding protein that regulates the expression of target mRNAs at the translation level. Binds RNA containing the sequence 5'-GUUAGUUAGUUAGUU-3' and other sequences containing the pattern 5'-[GA]U1-3AGU-3'.	Triticum urartu	XLOC_016638	TCONS_00027608	-8.72336	0.000911282	24Zn/UT
chr2	MLOC_43868	Uncharacterized		XLOC_016765	TCONS_00027989	7.63711	0.00573677	24Zn/UT
chr2	MLOC_37380	Zinc-metallopeptidase, peroxisomal-like isoform 1	Brachypodium distachyon	XLOC_016822	TCONS_00028217	-7.89268	0.00411135	24Zn/UT
chr2	MLOC_37380	Zinc-metallopeptidase, peroxisomal-like isoform 1	Brachypodium distachyon	XLOC_016822	TCONS_00028218	5.16584	0.00850388	24Zn/UT
chr2	MLOC_4342	Nipped-B-like protein-like, cohesin loading factor subunit; a zinc binding protein. Probably plays a structural role in chromatin. Involved in sister chromatid cohesion, possibly by interacting with the cohesin complex.	Brachypodium distachyon	XLOC_016846	TCONS_00028300	7.66394	0.0063519	24Zn/UT
chr2	MLOC_75141	Putative UDP-N-acetylglucosamine--peptide N-acetylglucosaminyltransferase SEC; O-linked N-acetylglucosamine transferase (OGT) that mediates O-glycosylation of capsid protein (CP) of virus in case of infection by Plum pox virus. OGTs catalyze the addition of nucleotide-activated sugars directly onto the polypeptide through O-glycosidic linkage with the hydroxyl of serine or threonine. Probably act…	Triticum urartu	XLOC_016896	TCONS_00028463	7.52449	0.0078143	24Zn/UT
chr2	MLOC_59150	RanBP2-type zinc finger protein; ZRANB2 can bind to a ssRNA sequence containing the consensus AGGUAA (see J Mol Biol. 2011 Mar 25;407(2):273-83).	Aegilops tauschii	XLOC_016904	TCONS_00028530	-8.7086	0.000911282	24Zn/UT
chr2	MLOC_7353	Uncharacterized		XLOC_017018	TCONS_00028986	-9.17382	0.000369718	24Zn/UT
chr2	MLOC_7353	Uncharacterized		XLOC_017018	TCONS_00028987	9.50382	0.000219143	24Zn/UT
chr2	MLOC_67122	Alpha-1,2-glucosyltransferase ALG10-A, Asparagine-linked glycosylation protein 10 homolog A; adds the third glucose residue to the lipid-linked oligosaccharide precursor for N-linked glycosylation. Transfers glucose from dolichyl phosphate glucose (Dol-P-Glc) onto the lipid-linked oligosaccharide Glc2Man9GlcNAc(2)-PP-Dol. A homozygous Arabidopsis T-DNA insertion mutant (alg10-1) accumulated mainl…	Triticum urartu	XLOC_017146	TCONS_00029456	-7.69716	0.00573677	24Zn/UT
chr2	MLOC_33688	F-box/LRR-repeat protein 13-like; likely acts for substrate-recognition component of the SCF (SKP1-CUL1-F-box protein)-type E3 ubiquitin ligase complex.	Setaria italica	XLOC_017148	TCONS_00029480	-9.9205	0.000107439	24Zn/UT
chr2	MLOC_11129	UFD1L, Ubiquitin fusion degradation 1 protein; it is an essential component of the ubiquitin-dependent proteolytic pathway which degrades ubiquitin fusion proteins. The ternary complex containing UFD1L, VCP and NPLOC4 binds ubiquitinated proteins and is necessary for the export of misfolded proteins from the ER to the cytoplasm, where they are degraded by the proteasome. The NPLOC4-UFD1L-VCP comp…	Triticum aestivum	XLOC_017302	TCONS_00029958	-7.91856	0.00393819	24Zn/UT
chr2	MLOC_62518	Putative glucose-6-phosphate 1-epimerase; catalyzes the interconversion between the alpha and beta anomers from at least three hexose 6-phosphate sugars (Glc6P, Gal6P, and Man6P). Involved in cellular carbohydrate metabolic process.	Triticum urartu	XLOC_017420	TCONS_00030381	9.91465	0.000109441	24Zn/UT
chr2	MLOC_11780	Putative potassium transporter 15 (HAK15), high-affinity K+ transport, sodium-potassium symporter which can functions as a Ca(2+)-permeable cation channel (see Proc Natl Acad Sci U S A. 2010, 107:7089-94).	Aegilops tauschii	XLOC_017435	TCONS_00030432	-8.29964	0.00197653	24Zn/UT
chr2	MLOC_64217	F-box/kelch-repeat protein At5g60570-like isoform 1, Galactose oxidase/kelch repeat superfamily protein. Galactose oxidase (GAO) is a Cu-containing oxidase found only in the genus Fusarium which contains many plant pathogens. It catalyses the oxidation of a terminal galactose residue to the corresponding aldehyde with the production of hydrogen peroxide.	Brachypodium distachyon	XLOC_017450	TCONS_00030509	-7.75578	0.00500819	24Zn/UT
chr2	HA2, MLOC_75846	Plasma membrane P-type proton pump ATPase, cation-transporting ATPase activity		XLOC_017610	TCONS_00031029	-11.7621	5.12e-06	24Zn/UT
chr2	MLOC_77326	E3 ubiquitin ligase BIG BROTHER-related protein (BBR); involved in protein autoubiquitination. It controls organ size in a dosage-dependent manner (see Curr Biol 2006, 16:272-9).	Triticum urartu	XLOC_017681	TCONS_00031310	-7.60452	0.00667837	24Zn/UT
chr2	MLOC_54981	Ankyrin-1; attaches integral membrane proteins to cytoskeletal elements. Involved in ER to Golgi vesicle-mediated transport, monovalent inorganic cation transport, and protein targeting to plasma membrane.	Triticum urartu	XLOC_017784	TCONS_00031713	7.4647	0.00825608	24Zn/UT
chr2	MLOC_57408	Glutathione-regulated potassium-efflux system protein kefC; catalyzes K+/H+ antiport. Inhibited by glutathione through interaction at C-terminal. This isoform has 137 extra amino acids at C-terminal compared to the isoform TCONS_00031940.	Aegilops tauschii	XLOC_017853	TCONS_00031939	-5.0563	0.00640923	24Zn/UT
chr2	MLOC_57408	Glutathione-regulated potassium-efflux system protein kefC; catalyzes K+/H+ antiport. Inhibited by glutathione through interaction at C-terminal. This isoform has 137 less amino acids at C-terminal compared to the isoform TCONS_00031939.	Aegilops tauschii	XLOC_017853	TCONS_00031940	4.55151	0.00951054	24Zn/UT
chr2	MLOC_55792	Uncharacterized protein, E3 ubiquitin-protein ligase MARCH7-like		XLOC_017998	TCONS_00032332	-7.47094	0.00825608	24Zn/UT
chr2	MLOC_5502	PHD finger transcription factor-like protein; zinc ion binding	Oryza sativa	XLOC_018238	TCONS_00033104	8.09703	0.00281537	24Zn/UT
chr2	MLOC_18152	Rho GTPase-activating protein 24; is involved in cell polarity, cell morphology and cytoskeletal organization and controls actin remodeling by inactivating Rac downstream of Rho leading to suppress leading edge protrusion and promotes cell retraction to achieve cellular polarity.	Triticum urartu	XLOC_018254	TCONS_00033157	7.93022	0.00363494	24Zn/UT
chr2	MLOC_62732	Transformation/transcription domain-associated protein-like isoform X2; an adapter protein, which is found in various multiprotein chromatin complexes with histone acetyltransferase activity (HAT), which gives a specific tag for epigenetic transcription activation.	Setaria italica	XLOC_018274	TCONS_00033219	-9.09656	0.000428893	24Zn/UT
chr2	MLOC_61849	Uncharacterized protein		XLOC_018433	TCONS_00033766	7.33714	0.00993539	24Zn/UT
chr2	MLOC_7849	Aspartic proteinase-like protein 2; APs are active in acidic pH and are specifically inhibited by pepstatin A. The catalytic Asp residues are located within the conserved Asp-Thr/Ser-Gly (DT/SG) motif. In most of the known APs, a pair of aspartic residues act together to bind and activate the catalytic water molecule. However, in some APs, residues of other amino acids replace the second Asp. APs…	Brachypodium distachyon	XLOC_018445	TCONS_00033824	-7.53928	0.00736121	24Zn/UT
chr2	MLOC_57581	Eukaryotic translation initiation factor 4G	Triticum urartu	XLOC_018538	TCONS_00034080	8.59217	0.00111646	24Zn/UT
chr2	MLOC_66645	Polyadenylate-binding protein 2, PABP-2; Localization of poly(A)-binding protein 2 (PABP2) in nuclear speckles is independent of import into the nucleus and requires binding to poly(A) RNA (Journal of Cell Science 2000, 113:2309-2318). Polyadenylation-Dependent Control of Long Noncoding RNA Expression by the Poly(A)-Binding Protein Nuclear 1 (PLoS Genet 2012, 8: e1003078).	Triticum urartu	XLOC_018651	TCONS_00034414	7.52449	0.00736121	24Zn/UT
chr2	MLOC_66645	Polyadenylate-binding protein 2, PABP-2; Localization of poly(A)-binding protein 2 (PABP2) in nuclear speckles is independent of import into the nucleus and requires binding to poly(A) RNA (Journal of Cell Science 2000, 113:2309-2318). Polyadenylation-Dependent Control of Long Noncoding RNA Expression by the Poly(A)-Binding Protein Nuclear 1 (PLoS Genet 2012, 8: e1003078).	Triticum urartu	XLOC_018651	TCONS_00034418	8.47584	0.0014152	24Zn/UT
chr2	MLOC_61362	CBL-interacting protein kinase 23; CIPK serine-threonine protein kinases interact with CBL proteins. Binding of a CBL protein to the regulatory NAF domain of CIPK protein leads to activation of the kinase in a calcium-dependent manner. Downstream of CBL1, CBL2, CBL3 and CBL9, regulates by phosphorylation the K+ conductance and uptake of AKT1 in low K+ condition, in response to calcium signaling a…		XLOC_018703	TCONS_00034588	-8.41325	0.00162851	24Zn/UT
chr2	MLOC_55398	Chaperone protein DnaJ; binds 2 zinc ions per monomer. Participates actively in the response to hyperosmotic and heat shock by preventing the aggregation of stress-denatured proteins and by disaggregating proteins, also in an autonomous, DnaK-independent fashion. Unfolded proteins bind initially to DnaJ; upon interaction with the DnaJ-bound protein, DnaK hydrolyzes its bound ATP, resulting in the…	Triticum urartu	XLOC_018772	TCONS_00034877	7.63711	0.0059726	24Zn/UT
chr2	MLOC_60935	Alkaline/neutral invertase CINV2-like; cytosolic invertase that may cleave sucrose into glucose and fructose, and that is involved in the regulation of root growth. May regulate sugar-mediated root development by controlling sucrose catabolism in root cells (see Proc Natl Acad Sci U S A 2009, 106:13124-9).	Setaria italica	XLOC_018785	TCONS_00034911	-8.17632	0.00239725	24Zn/UT
chr2	MLOC_4643	Cyclin-dependent kinase G-2 (CDKG-2); cyclins, cyclin-dependent kinases, and a number of other proteins control the progression of plant cell cycle (Plant Mol Biol 2007, 64:349-60). Down-regulated by cytokinin.	Aegilops tauschii	XLOC_018806	TCONS_00035000	-7.81211	0.00454319	24Zn/UT
chr2	MLOC_64596	Auxin response factor 9 (ARF9); auxin response factors (ARFs) are transcriptional factors that binds specifically to the DNA sequence 5'-TGTCTC-3' found in the auxin-responsive promoter elements (AuxREs) [see Gene 2007, 394:13-24].	Aegilops tauschii	XLOC_018887	TCONS_00035356	-8.35757	0.00176385	24Zn/UT
chr2	MLOC_37926	Vesicle-associated protein 1-2-like isoform 1	Brachypodium distachyon	XLOC_019111	TCONS_00036240	8.13588	0.00255008	24Zn/UT
chr2	MLOC_5020	Putative leucine-rich repeat-containing protein DDB_G0290503-like; a chromosome segregation ATPases involed in cell division and chromosome partitioning.	Setaria italica	XLOC_019189	TCONS_00036550	10.7884	2.37e-05	24Zn/UT
chr2	MLOC_63287	Choline transporter-like protein 2-like; exhibits some choline transporter activity (Proc Natl Acad Sci USA 2000, 97:1835-1840; Protein J 2010, 29:417-426). Choline (Cho) is the precursor of the osmoprotectant glycine betaine (Plant Science Letters 1975, 4:161–168; Plant Physiol 1993, 103: 1269-1276). Choline (Cho) is a vital metabolite in plants and other eukaryotes because it is needed to synth…	Brachypodium distachyon	XLOC_019603	TCONS_00038021	-5.82082	0.00825608	24Zn/UT
2HL	XLOC_026074	TBC1 domain family member 13; may act as a GTPase-activating protein for Rab family protein(s) in human. Rab GTPases regulate many steps of membrane traffic, including vesicle formation, vesicle movement along actin and tubulin networks, and membrane fusion.	Brachypodium distachyon	XLOC_026074	TCONS_00045415	-7.47094	0.00825608	24Zn/UT
2HL	MLOC_52834	Uncharacterized protein		XLOC_026275	TCONS_00045803	7.79109	0.00475111	24Zn/UT
2HL	MLOC_36767	D-lactate dehydrogenase [cytochrome], mitochondrial-like; catalyzes the stereospecific oxidation of D-lactate to pyruvate. Predicted for ER localization by PlantLoc server.	Brachypodium distachyon	XLOC_026289	TCONS_00045885	-9.08517	0.00044576	24Zn/UT
2HL	MLOC_36767	D-lactate dehydrogenase [cytochrome], mitochondrial-like; catalyzes the stereospecific oxidation of D-lactate to pyruvate. Predicted for ER localization by PlantLoc server.	Brachypodium distachyon	XLOC_026289	TCONS_00045888	8.22867	0.00230061	24Zn/UT
2HS	MLOC_44144	MORC family CW-type zinc finger protein 4, Morc4; Overall, could be suggested that MORC4 may act as a transcription factor, and may have a role in DNA recombination or repair (British Journal of Haematology, 138, 479-486). This isoform is a putative Golgy localized protein (predicted by PlantLoc server). The other expressed isoform (TCONS_00050761) with extra 121 amino acids at N-terminal region …	Aegilops tauschii	XLOC_030427	TCONS_00050762	-9.53345	0.000203549	24Zn/UT
2HS	MLOC_69656	Similar to protein LTV1; Ltv1 is required for efficient nuclear export of the ribosomal small subunit in Saccharomyces cerevisiae (see Genetics 2006, 174:679-91).	Setaria italica	XLOC_030482	TCONS_00050997	-8.04146	0.00314995	24Zn/UT
2HS	XLOC_030494	HUA2-like protein 3-like; a Tudor/PWWP/MBT domain-containing protein. Probable transcrition factor that seems to be involved in mRNA processing.	Setaria italica	XLOC_030494	TCONS_00051058	-7.78422	0.00475111	24Zn/UT
2HS	MLOC_69302	L-ascorbate peroxidase 2, cytosolic (APX2); heme and Ca binding. Plays a key role in hydrogen peroxide removal and stress response (see Gene 2003, 322:93-103).	Aegilops tauschii	XLOC_030601	TCONS_00051367	8.33267	0.00186322	24Zn/UT
2HS	MLOC_36341	Pyrrolidone-carboxylate peptidase; removes 5-oxoproline from various penultimate amino acid residues except L-proline.	Aegilops tauschii	XLOC_030624	TCONS_00051444	9.69808	0.000157836	24Zn/UT
2HS	MLOC_62042	E3 ubiquitin protein ligase RIN2-like; can codes for 80 amino acids out of the 566 amino acids of the protein. So, may be it is involved in negative regulation!	Brachypodium distachyon	XLOC_030642	TCONS_00051513	-7.39921	0.00929072	24Zn/UT
2HS	MLOC_36966	Putative 6-phosphogluconolactonase 2; hydrolysis of 6-phosphogluconolactone to 6-phosphogluconate. Involved in carbohydrate degradation, pentose phosphate pathway; D-ribulose 5-phosphate from D-glucose 6-phosphate (oxidative stage). This isoform has no signal peptide.	Aegilops tauschii	XLOC_030757	TCONS_00051737	8.29883	0.00190788	24Zn/UT
2HS	XLOC_030852	Uncharacterized		XLOC_030852	TCONS_00051869	10.7915	2.39e-05	24Zn/UT
2HS	MLOC_50786	Probable AMP deaminase-like, EMBRYONIC FACTOR 1; AMP deaminase plays a critical role in energy metabolism. Essential for the transition from zygote to embryo (Plant J 2005, 42:743-56). Catalyzes AMP + H2O = IMP + NH3.	Brachypodium distachyon	XLOC_030898	TCONS_00051974	10.1078	8.99e-05	24Zn/UT
2HS	MLOC_58535	CHD3-type chromatin-remodeling factor PICKLE (PKL); chromatin remodeling factor that represses the expression of embryonic trait genes (such as NFYB9/LEC1) upon and after seed germination and thus enables the developmental switch to post-germinative growth (see Plant J 2005, 44:1010-22). PHERES1 (PHE1) and PHERES2 (PHE2) code for type I MADS box proteins are transiently expressed in young embryos…	Aegilops tauschii	XLOC_030935	TCONS_00052102	-7.47028	0.000394025	24Zn/UT
2HS	XLOC_030993	Uncharacterized		XLOC_030993	TCONS_00052329	7.3701	0.00993539	24Zn/UT
chr3	MLOC_78810	E3 ubiquitin-protein ligase UBR2-like isoform X1; E3 ubiquitin-protein ligase which is a component of the N-end rule pathway. Recognizes and binds to proteins bearing specific N-terminal residues that are destabilizing according to the N-end rule, leading to their ubiquitination and subsequent degradation. Plays a critical role in chromatin inactivation and chromosome-wide transcriptional silenci…	Setaria italica	XLOC_034264	TCONS_00056319	-7.66694	0.0059726	24Zn/UT
chr3	MLOC_70638	Gigantea 2; GIGANTEA (GI), CONSTANS (CO), and FLOWERING LOCUS T (FT) promotes flowering specifically under long days. Within this pathway, GI regulates circadian rhythms and flowering and acts earlier in the hierarchy than CO and FT (see The Plant Cell 2005, 17:2255-2270). Iron also is involved in the maintenance of circadian period length in Arabidopsis1,2[ ; Plant Physiology 2013, 161:1409-1420…	Triticum aestivum	XLOC_034436	TCONS_00056941	7.97376	0.0037735	24Zn/UT
[truncated: 944 more rows]
