# Supplementary material for: Deciphering Mineral Homeostasis in Barley Seed Transfer Cells at Transcriptional Level
Source: PLOS journal article supplement (doi:10.1371/journal.pone.0141398), 2015-11-04

**S5 Fig. Chloroplastic tetrapyrrole, heme, and chlorophyll biosynthetic pathways were influenced after the treatments.**

Accession numbers of the genes are available in S4 File. Fe and Zn represent iron and zinc treatments and, 6 and 24 represent samples of 6 h and 24 h after either of the treatments. UT stands for untreated sample. Comparisons of 24Fe/Untreated sample and 24Zn/Untreated sample are shown as 24Fe and 24Zn, respectively. Zinc treatment was compared with iron treatment which is shown as 6Zn/6Fe or 24Zn/24Fe.

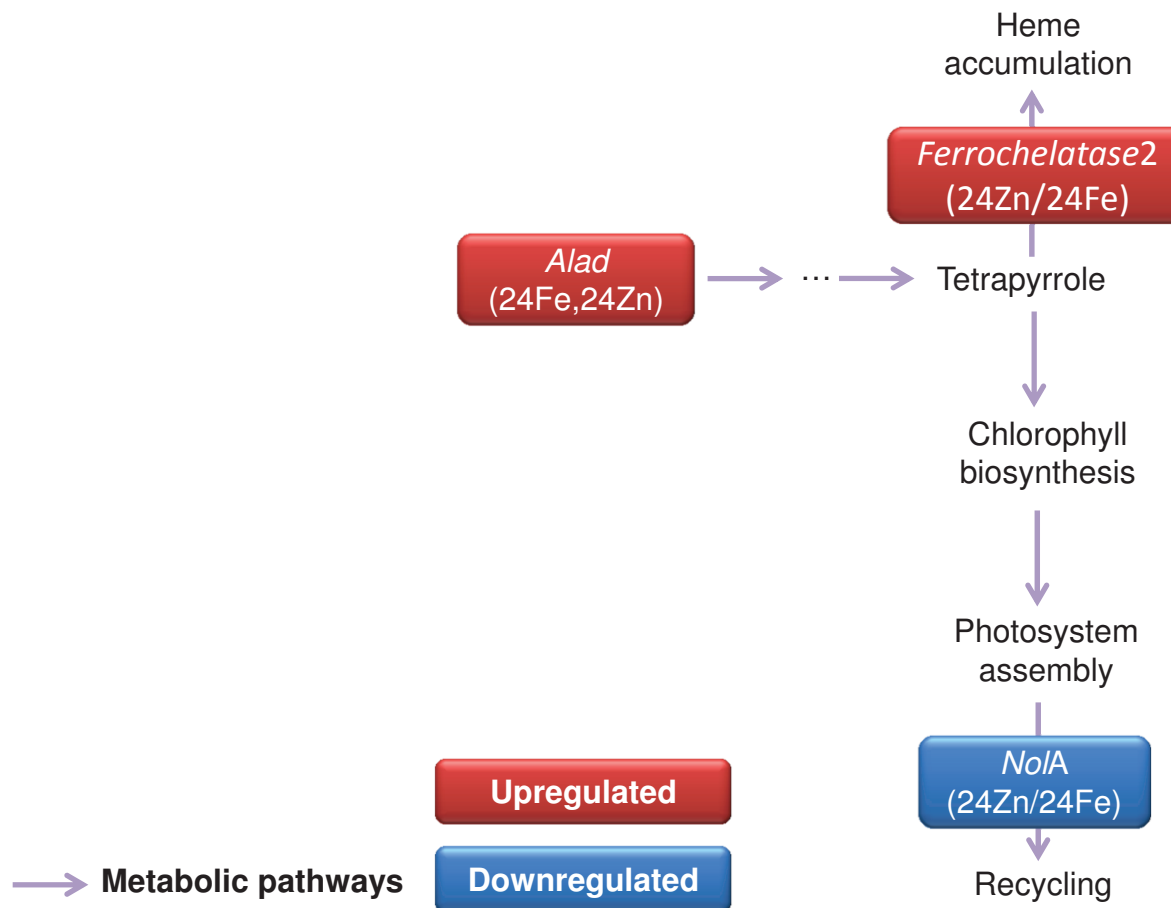

Supplement: S5 (10.1371/journal.pone.0141398.s005) [file journal.pone.0141398.s005]
